# Supplementary material
Source: PubMed Central journal article supplement (PMC5354304)
Supplement: NIHMS834073-supplement-3.xls [file NIHMS834073-supplement-3.xls]

## Sheet: HIVLatency_sampled_complexes_CO
corum id	complex name	subunits	avg. complex score	p-value	q-value	GeneID	Symbol	GeneInfo	Gene pMW	Gene pMW (one-sided, log-transformed)
2294	ABI1-WASF2 complex	2	2.93856	4.86234e-07	0.000840212	10006	ABI1	abl-interactor 1	0.00017832	3.7488
2294	ABI1-WASF2 complex	2	2.93856	4.86234e-07	0.000840212	10163	WASF2	WAS protein family, member 2	0.00744186	2.12832
2255	Cofilin-actin-CAP1 complex	3	-1.85077	5.75765e-05	0.0497461	60	ACTB	actin, beta	0.401882	-0.395901
2255	Cofilin-actin-CAP1 complex	3	-1.85077	5.75765e-05	0.0497461	1072	CFL1	cofilin 1 (non-muscle)	4.36611e-05	-4.35991
2255	Cofilin-actin-CAP1 complex	3	-1.85077	5.75765e-05	0.0497461	10487	CAP1	CAP, adenylate cyclase-associated protein 1 (yeast)	0.159768	-0.796509
2297	ABI1-WASL complex	2	2.11133	0.00023518	0.135164	8976	WASL	Wiskott-Aldrich syndrome-like	0.335852	0.473852
2297	ABI1-WASL complex	2	2.11133	0.00023518	0.135164	10006	ABI1	abl-interactor 1	0.00017832	3.7488
186	Wave-2 complex	5	1.33479	0.00031288	0.135164	10006	ABI1	abl-interactor 1	0.00017832	3.7488
186	Wave-2 complex	5	1.33479	0.00031288	0.135164	10163	WASF2	WAS protein family, member 2	0.00744186	2.12832
186	Wave-2 complex	5	1.33479	0.00031288	0.135164	10787	NCKAP1	NCK-associated protein 1	0.136456	0.865008
186	Wave-2 complex	5	1.33479	0.00031288	0.135164	23191	CYFIP1	cytoplasmic FMR1 interacting protein 1	0.998923	0.000468145
186	Wave-2 complex	5	1.33479	0.00031288	0.135164	55845	C3orf10	chromosome 3 open reading frame 10	0.853803	-0.0686425
5318	DDEF1-CTTN-PXN complex	3	-1.53372	0.000664012	0.205042	2017	CTTN	cortactin	0.00557349	-2.25387
5318	DDEF1-CTTN-PXN complex	3	-1.53372	0.000664012	0.205042	5829	PXN	paxillin	0.16674	-0.77796
5318	DDEF1-CTTN-PXN complex	3	-1.53372	0.000664012	0.205042	50807	ASAP1	ArfGAP with SH3 domain, ankyrin repeat and PH domain 1	0.0269576	-1.56932
3525	Tetrameric COG subcomplex	4	1.36133	0.000819858	0.205042	10466	COG5	component of oligomeric golgi complex 5	0.00202323	2.69396
3525	Tetrameric COG subcomplex	4	1.36133	0.000819858	0.205042	57511	COG6	component of oligomeric golgi complex 6	0.007646	2.11657
3525	Tetrameric COG subcomplex	4	1.36133	0.000819858	0.205042	84342	COG8	component of oligomeric golgi complex 8	0.0497593	1.30313
3525	Tetrameric COG subcomplex	4	1.36133	0.000819858	0.205042	91949	COG7	component of oligomeric golgi complex 7	0.214627	-0.668315
930	Scrib-beta-PIX-GIT1 complex	3	-1.50187	0.00083061	0.205042	8874	ARHGEF7	Rho guanine nucleotide exchange factor (GEF) 7	0.169177	-0.771658
930	Scrib-beta-PIX-GIT1 complex	3	-1.50187	0.00083061	0.205042	23513	SCRIB	scribbled homolog (Drosophila)	0.00793243	-2.10059
930	Scrib-beta-PIX-GIT1 complex	3	-1.50187	0.00083061	0.205042	28964	GIT1	G protein-coupled receptor kinase interacting ArfGAP 1	0.023261	-1.63337
91	FA complex (Fanconi anemia complex), cytoplasmic	4	1.29878	0.00135274	0.292193	2175	FANCA	Fanconi anemia, complementation group A	0.0299133	1.52414
91	FA complex (Fanconi anemia complex), cytoplasmic	4	1.29878	0.00135274	0.292193	2176	FANCC	Fanconi anemia, complementation group C	0.000160155	3.79546
91	FA complex (Fanconi anemia complex), cytoplasmic	4	1.29878	0.00135274	0.292193	2188	FANCF	Fanconi anemia, complementation group F	0.109125	0.962075
91	FA complex (Fanconi anemia complex), cytoplasmic	4	1.29878	0.00135274	0.292193	2189	FANCG	Fanconi anemia, complementation group G	0.0819282	-1.08657
306	Ribosome, cytoplasmic	80	-0.225748	0.00164182	0.311867	2197	FAU	Finkel-Biskis-Reilly murine sarcoma virus (FBR-MuSV) ubiquitously expressed	0.338524	-0.470411
306	Ribosome, cytoplasmic	80	-0.225748	0.00164182	0.311867	3921	RPSA	ribosomal protein SA	0.460618	-0.336659
306	Ribosome, cytoplasmic	80	-0.225748	0.00164182	0.311867	4736	RPL10A	ribosomal protein L10a	0.297089	-0.527113
306	Ribosome, cytoplasmic	80	-0.225748	0.00164182	0.311867	6122	RPL3	ribosomal protein L3	0.599738	0.222039
306	Ribosome, cytoplasmic	80	-0.225748	0.00164182	0.311867	6124	RPL4	ribosomal protein L4	0.135802	-0.867093
306	Ribosome, cytoplasmic	80	-0.225748	0.00164182	0.311867	6125	RPL5	ribosomal protein L5	0.757531	0.1206
306	Ribosome, cytoplasmic	80	-0.225748	0.00164182	0.311867	6128	RPL6	ribosomal protein L6	0.0266673	-1.57402
306	Ribosome, cytoplasmic	80	-0.225748	0.00164182	0.311867	6129	RPL7	ribosomal protein L7	0.214475	-0.668624
306	Ribosome, cytoplasmic	80	-0.225748	0.00164182	0.311867	6130	RPL7A	ribosomal protein L7a	0.806912	-0.0931739
306	Ribosome, cytoplasmic	80	-0.225748	0.00164182	0.311867	6132	RPL8	ribosomal protein L8	0.529147	-0.276423
306	Ribosome, cytoplasmic	80	-0.225748	0.00164182	0.311867	6133	RPL9	ribosomal protein L9	0.191153	0.718619
306	Ribosome, cytoplasmic	80	-0.225748	0.00164182	0.311867	6134	RPL10	ribosomal protein L10	0.663641	-0.178067
306	Ribosome, cytoplasmic	80	-0.225748	0.00164182	0.311867	6135	RPL11	ribosomal protein L11	0.758885	-0.119824
306	Ribosome, cytoplasmic	80	-0.225748	0.00164182	0.311867	6136	RPL12	ribosomal protein L12	0.0180741	-1.74294
306	Ribosome, cytoplasmic	80	-0.225748	0.00164182	0.311867	6137	RPL13	ribosomal protein L13	0.0866677	-1.06214
306	Ribosome, cytoplasmic	80	-0.225748	0.00164182	0.311867	6138	RPL15	ribosomal protein L15	0.261139	0.583129
306	Ribosome, cytoplasmic	80	-0.225748	0.00164182	0.311867	6139	RPL17	ribosomal protein L17	0.698613	-0.155763
306	Ribosome, cytoplasmic	80	-0.225748	0.00164182	0.311867	6141	RPL18	ribosomal protein L18	0.175028	-0.756893
306	Ribosome, cytoplasmic	80	-0.225748	0.00164182	0.311867	6142	RPL18A	ribosomal protein L18a	0.972571	0.0120788
306	Ribosome, cytoplasmic	80	-0.225748	0.00164182	0.311867	6143	RPL19	ribosomal protein L19	0.645659	0.189997
306	Ribosome, cytoplasmic	80	-0.225748	0.00164182	0.311867	6144	RPL21	ribosomal protein L21	0.112783	-0.947755
306	Ribosome, cytoplasmic	80	-0.225748	0.00164182	0.311867	6146	RPL22	ribosomal protein L22	0.924185	0.0342412
306	Ribosome, cytoplasmic	80	-0.225748	0.00164182	0.311867	6147	RPL23A	ribosomal protein L23a	0.225483	0.646886
306	Ribosome, cytoplasmic	80	-0.225748	0.00164182	0.311867	6152	RPL24	ribosomal protein L24	0.87833	-0.0563422
306	Ribosome, cytoplasmic	80	-0.225748	0.00164182	0.311867	6154	RPL26	ribosomal protein L26	0.565059	-0.247906
306	Ribosome, cytoplasmic	80	-0.225748	0.00164182	0.311867	6155	RPL27	ribosomal protein L27	0.015536	1.80866
306	Ribosome, cytoplasmic	80	-0.225748	0.00164182	0.311867	6156	RPL30	ribosomal protein L30	0.150191	-0.823356
306	Ribosome, cytoplasmic	80	-0.225748	0.00164182	0.311867	6157	RPL27A	ribosomal protein L27a	0.260113	-0.584838
306	Ribosome, cytoplasmic	80	-0.225748	0.00164182	0.311867	6158	RPL28	ribosomal protein L28	0.821872	-0.0851958
306	Ribosome, cytoplasmic	80	-0.225748	0.00164182	0.311867	6159	RPL29	ribosomal protein L29	0.670181	0.173808
306	Ribosome, cytoplasmic	80	-0.225748	0.00164182	0.311867	6160	RPL31	ribosomal protein L31	0.571801	0.242755
306	Ribosome, cytoplasmic	80	-0.225748	0.00164182	0.311867	6161	RPL32	ribosomal protein L32	0.0834998	-1.07831
306	Ribosome, cytoplasmic	80	-0.225748	0.00164182	0.311867	6164	RPL34	ribosomal protein L34	0.583442	0.234002
306	Ribosome, cytoplasmic	80	-0.225748	0.00164182	0.311867	6165	RPL35A	ribosomal protein L35a	0.869337	0.0608116
306	Ribosome, cytoplasmic	80	-0.225748	0.00164182	0.311867	6167	RPL37	ribosomal protein L37	0.0990682	-1.00407
306	Ribosome, cytoplasmic	80	-0.225748	0.00164182	0.311867	6168	RPL37A	ribosomal protein L37a	0.729928	-0.13672
306	Ribosome, cytoplasmic	80	-0.225748	0.00164182	0.311867	6169	RPL38	ribosomal protein L38	0.118606	0.925893
306	Ribosome, cytoplasmic	80	-0.225748	0.00164182	0.311867	6170	RPL39	ribosomal protein L39	0.450999	-0.345824
306	Ribosome, cytoplasmic	80	-0.225748	0.00164182	0.311867	6171	RPL41	ribosomal protein L41	0.616144	-0.210318
306	Ribosome, cytoplasmic	80	-0.225748	0.00164182	0.311867	6173	RPL36A	ribosomal protein L36a	0.807104	-0.0930706
306	Ribosome, cytoplasmic	80	-0.225748	0.00164182	0.311867	6175	RPLP0	ribosomal protein, large, P0	0.45605	-0.340987
306	Ribosome, cytoplasmic	80	-0.225748	0.00164182	0.311867	6176	RPLP1	ribosomal protein, large, P1	0.0617348	-1.20947
306	Ribosome, cytoplasmic	80	-0.225748	0.00164182	0.311867	6181	RPLP2	ribosomal protein, large, P2	0.308373	0.510924
306	Ribosome, cytoplasmic	80	-0.225748	0.00164182	0.311867	6187	RPS2	ribosomal protein S2	0.576643	0.239093
306	Ribosome, cytoplasmic	80	-0.225748	0.00164182	0.311867	6188	RPS3	ribosomal protein S3	0.138432	-0.858764
306	Ribosome, cytoplasmic	80	-0.225748	0.00164182	0.311867	6189	RPS3A	ribosomal protein S3A	0.129888	0.886431
306	Ribosome, cytoplasmic	80	-0.225748	0.00164182	0.311867	6191	RPS4X	ribosomal protein S4, X-linked	0.79976	-0.0970405
306	Ribosome, cytoplasmic	80	-0.225748	0.00164182	0.311867	6193	RPS5	ribosomal protein S5	0.0460334	1.33693
306	Ribosome, cytoplasmic	80	-0.225748	0.00164182	0.311867	6194	RPS6	ribosomal protein S6	0.600072	0.221796
306	Ribosome, cytoplasmic	80	-0.225748	0.00164182	0.311867	6201	RPS7	ribosomal protein S7	0.338407	-0.470561
306	Ribosome, cytoplasmic	80	-0.225748	0.00164182	0.311867	6202	RPS8	ribosomal protein S8	0.50548	-0.296296
306	Ribosome, cytoplasmic	80	-0.225748	0.00164182	0.311867	6203	RPS9	ribosomal protein S9	0.875308	-0.0578393
306	Ribosome, cytoplasmic	80	-0.225748	0.00164182	0.311867	6204	RPS10	ribosomal protein S10	0.697313	-0.156572
306	Ribosome, cytoplasmic	80	-0.225748	0.00164182	0.311867	6205	RPS11	ribosomal protein S11	0.818289	-0.0870934
306	Ribosome, cytoplasmic	80	-0.225748	0.00164182	0.311867	6206	RPS12	ribosomal protein S12	0.716412	-0.144837
306	Ribosome, cytoplasmic	80	-0.225748	0.00164182	0.311867	6207	RPS13	ribosomal protein S13	0.0422796	-1.37387
306	Ribosome, cytoplasmic	80	-0.225748	0.00164182	0.311867	6208	RPS14	ribosomal protein S14	0.190663	-0.719733
306	Ribosome, cytoplasmic	80	-0.225748	0.00164182	0.311867	6209	RPS15	ribosomal protein S15	0.43139	-0.36513
306	Ribosome, cytoplasmic	80	-0.225748	0.00164182	0.311867	6210	RPS15A	ribosomal protein S15a	0.0658536	-1.18142
306	Ribosome, cytoplasmic	80	-0.225748	0.00164182	0.311867	6217	RPS16	ribosomal protein S16	0.134363	-0.871721
306	Ribosome, cytoplasmic	80	-0.225748	0.00164182	0.311867	6218	RPS17	ribosomal protein S17	0.854873	0.0680984
306	Ribosome, cytoplasmic	80	-0.225748	0.00164182	0.311867	6222	RPS18	ribosomal protein S18	0.408952	-0.388327
306	Ribosome, cytoplasmic	80	-0.225748	0.00164182	0.311867	6223	RPS19	ribosomal protein S19	0.865637	0.0626643
306	Ribosome, cytoplasmic	80	-0.225748	0.00164182	0.311867	6224	RPS20	ribosomal protein S20	0.0136619	-1.86449
306	Ribosome, cytoplasmic	80	-0.225748	0.00164182	0.311867	6227	RPS21	ribosomal protein S21	0.0739299	-1.13118
306	Ribosome, cytoplasmic	80	-0.225748	0.00164182	0.311867	6228	RPS23	ribosomal protein S23	0.794326	-0.100001
306	Ribosome, cytoplasmic	80	-0.225748	0.00164182	0.311867	6229	RPS24	ribosomal protein S24	0.170116	0.769254
306	Ribosome, cytoplasmic	80	-0.225748	0.00164182	0.311867	6230	RPS25	ribosomal protein S25	0.506588	0.295345
306	Ribosome, cytoplasmic	80	-0.225748	0.00164182	0.311867	6231	RPS26	ribosomal protein S26	0.359616	-0.444161
306	Ribosome, cytoplasmic	80	-0.225748	0.00164182	0.311867	6232	RPS27	ribosomal protein S27	0.711256	-0.147974
306	Ribosome, cytoplasmic	80	-0.225748	0.00164182	0.311867	6233	RPS27A	ribosomal protein S27a	0.233087	0.632482
306	Ribosome, cytoplasmic	80	-0.225748	0.00164182	0.311867	6234	RPS28	ribosomal protein S28	0.682992	0.165585
306	Ribosome, cytoplasmic	80	-0.225748	0.00164182	0.311867	6235	RPS29	ribosomal protein S29	0.693813	0.158758
306	Ribosome, cytoplasmic	80	-0.225748	0.00164182	0.311867	7311	UBA52	ubiquitin A-52 residue ribosomal protein fusion product 1	0.724332	0.140062
306	Ribosome, cytoplasmic	80	-0.225748	0.00164182	0.311867	9045	RPL14	ribosomal protein L14	0.669042	-0.174547
306	Ribosome, cytoplasmic	80	-0.225748	0.00164182	0.311867	9349	RPL23	ribosomal protein L23	0.312513	-0.505132
306	Ribosome, cytoplasmic	80	-0.225748	0.00164182	0.311867	11224	RPL35	ribosomal protein L35	0.186923	-0.728337
306	Ribosome, cytoplasmic	80	-0.225748	0.00164182	0.311867	23521	RPL13A	ribosomal protein L13a	0.20206	-0.69452
306	Ribosome, cytoplasmic	80	-0.225748	0.00164182	0.311867	25873	RPL36	ribosomal protein L36	0.438164	-0.358364
306	Ribosome, cytoplasmic	80	-0.225748	0.00164182	0.311867	140032	RPS4Y2	ribosomal protein S4, Y-linked 2	0.490292	-0.309545
1624	FA core complex (Fanconi anemia core complex)	9	0.859554	0.00189457	0.311867	2175	FANCA	Fanconi anemia, complementation group A	0.0299133	1.52414
1624	FA core complex (Fanconi anemia core complex)	9	0.859554	0.00189457	0.311867	2176	FANCC	Fanconi anemia, complementation group C	0.000160155	3.79546
1624	FA core complex (Fanconi anemia core complex)	9	0.859554	0.00189457	0.311867	2178	FANCE	Fanconi anemia, complementation group E	0.46227	-0.335104
1624	FA core complex (Fanconi anemia core complex)	9	0.859554	0.00189457	0.311867	2187	FANCB	Fanconi anemia, complementation group B	0.644439	-0.190818
1624	FA core complex (Fanconi anemia core complex)	9	0.859554	0.00189457	0.311867	2188	FANCF	Fanconi anemia, complementation group F	0.109125	0.962075
1624	FA core complex (Fanconi anemia core complex)	9	0.859554	0.00189457	0.311867	2189	FANCG	Fanconi anemia, complementation group G	0.0819282	-1.08657
1624	FA core complex (Fanconi anemia core complex)	9	0.859554	0.00189457	0.311867	55120	FANCL	Fanconi anemia, complementation group L	0.626463	0.203105
1624	FA core complex (Fanconi anemia core complex)	9	0.859554	0.00189457	0.311867	57697	FANCM	Fanconi anemia, complementation group M	0.0549731	1.25985
1624	FA core complex (Fanconi anemia core complex)	9	0.859554	0.00189457	0.311867	80233	C17orf70	chromosome 17 open reading frame 70	0.0248972	1.60385
5521	EED-EZH polycomb complex	2	1.74164	0.00204316	0.311867	2146	EZH2	enhancer of zeste homolog 2 (Drosophila)	0.171958	0.764579
5521	EED-EZH polycomb complex	2	1.74164	0.00204316	0.311867	8726	EED	embryonic ectoderm development	0.00191118	2.7187
5101	CyclinD3-CDK4-CDK6-p21 complex	4	1.22453	0.00238578	0.311867	896	CCND3	cyclin D3	0.0610609	1.21424
5101	CyclinD3-CDK4-CDK6-p21 complex	4	1.22453	0.00238578	0.311867	1019	CDK4	cyclin-dependent kinase 4	0.391005	0.407817
5101	CyclinD3-CDK4-CDK6-p21 complex	4	1.22453	0.00238578	0.311867	1021	CDK6	cyclin-dependent kinase 6	0.126875	0.896623
5101	CyclinD3-CDK4-CDK6-p21 complex	4	1.22453	0.00238578	0.311867	1026	CDKN1A	cyclin-dependent kinase inhibitor 1A (p21, Cip1)	0.0041739	2.37946
2534	Cbl-SLP-76-Grb2 complex, Fc receptor gamma-R1 stimulated	3	1.42067	0.00245293	0.311867	867	CBL	Cas-Br-M (murine) ecotropic retroviral transforming sequence	0.0406959	1.39045
2534	Cbl-SLP-76-Grb2 complex, Fc receptor gamma-R1 stimulated	3	1.42067	0.00245293	0.311867	2885	GRB2	growth factor receptor-bound protein 2	0.010854	1.96441
2534	Cbl-SLP-76-Grb2 complex, Fc receptor gamma-R1 stimulated	3	1.42067	0.00245293	0.311867	3937	LCP2	lymphocyte cytosolic protein 2 (SH2 domain containing leukocyte protein of 76kDa)	0.123834	0.907161
66	TRAP complex	8	-0.765659	0.00292018	0.311867	5469	MED1	mediator complex subunit 1	0.0914742	-1.0387
66	TRAP complex	8	-0.765659	0.00292018	0.311867	7067	THRA	thyroid hormone receptor, alpha (erythroblastic leukemia viral (v-erb-a) oncogene homolog, avian)	0.0901389	-1.04509
66	TRAP complex	8	-0.765659	0.00292018	0.311867	9282	MED14	mediator complex subunit 14	0.961751	0.0169375
66	TRAP complex	8	-0.765659	0.00292018	0.311867	9440	MED17	mediator complex subunit 17	0.430739	-0.365786
66	TRAP complex	8	-0.765659	0.00292018	0.311867	9862	MED24	mediator complex subunit 24	0.0126048	-1.89946
66	TRAP complex	8	-0.765659	0.00292018	0.311867	9967	THRAP3	thyroid hormone receptor associated protein 3	0.769626	0.11372
66	TRAP complex	8	-0.765659	0.00292018	0.311867	9968	MED12	mediator complex subunit 12	0.0388398	-1.41072
66	TRAP complex	8	-0.765659	0.00292018	0.311867	10025	MED16	mediator complex subunit 16	0.319031	-0.496168
3529	Ternary COG subcomplex	3	1.38074	0.00315013	0.311867	10466	COG5	component of oligomeric golgi complex 5	0.00202323	2.69396
3529	Ternary COG subcomplex	3	1.38074	0.00315013	0.311867	57511	COG6	component of oligomeric golgi complex 6	0.007646	2.11657
3529	Ternary COG subcomplex	3	1.38074	0.00315013	0.311867	91949	COG7	component of oligomeric golgi complex 7	0.214627	-0.668315
3545	COG5-COG6-COG7 subcomplex	3	1.38074	0.00315013	0.311867	10466	COG5	component of oligomeric golgi complex 5	0.00202323	2.69396
3545	COG5-COG6-COG7 subcomplex	3	1.38074	0.00315013	0.311867	57511	COG6	component of oligomeric golgi complex 6	0.007646	2.11657
3545	COG5-COG6-COG7 subcomplex	3	1.38074	0.00315013	0.311867	91949	COG7	component of oligomeric golgi complex 7	0.214627	-0.668315
2600	BRD4 complex	8	-0.756887	0.00319721	0.311867	904	CCNT1	cyclin T1	0.692218	-0.159757
2600	BRD4 complex	8	-0.756887	0.00319721	0.311867	1025	CDK9	cyclin-dependent kinase 9	0.109377	-0.961074
2600	BRD4 complex	8	-0.756887	0.00319721	0.311867	5469	MED1	mediator complex subunit 1	0.0914742	-1.0387
2600	BRD4 complex	8	-0.756887	0.00319721	0.311867	9282	MED14	mediator complex subunit 14	0.961751	0.0169375
2600	BRD4 complex	8	-0.756887	0.00319721	0.311867	9440	MED17	mediator complex subunit 17	0.430739	-0.365786
2600	BRD4 complex	8	-0.756887	0.00319721	0.311867	9862	MED24	mediator complex subunit 24	0.0126048	-1.89946
2600	BRD4 complex	8	-0.756887	0.00319721	0.311867	9968	MED12	mediator complex subunit 12	0.0388398	-1.41072
2600	BRD4 complex	8	-0.756887	0.00319721	0.311867	23476	BRD4	bromodomain containing 4	0.580056	-0.23653
2962	CRK-BCAR1-DOCK1 complex	3	1.37488	0.00326608	0.311867	1398	CRK	v-crk sarcoma virus CT10 oncogene homolog (avian)	0.288027	-0.540566
2962	CRK-BCAR1-DOCK1 complex	3	1.37488	0.00326608	0.311867	1793	DOCK1	dedicator of cytokinesis 1	0.0753486	1.12292
2962	CRK-BCAR1-DOCK1 complex	3	1.37488	0.00326608	0.311867	9564	BCAR1	breast cancer anti-estrogen resistance 1	0.000286887	3.54229
1177	Polycomb repressive complex 4 (PRC4)	3	1.36642	0.00344047	0.311867	2146	EZH2	enhancer of zeste homolog 2 (Drosophila)	0.171958	0.764579
1177	Polycomb repressive complex 4 (PRC4)	3	1.36642	0.00344047	0.311867	8726	EED	embryonic ectoderm development	0.00191118	2.7187
1177	Polycomb repressive complex 4 (PRC4)	3	1.36642	0.00344047	0.311867	23411	SIRT1	sirtuin 1	0.242108	0.615992
2480	CIN85 complex (CIN85, CRK, BCAR1, CBL, PIK3R1, GRB2, SOS1)	7	0.892654	0.00360957	0.311867	867	CBL	Cas-Br-M (murine) ecotropic retroviral transforming sequence	0.0406959	1.39045
2480	CIN85 complex (CIN85, CRK, BCAR1, CBL, PIK3R1, GRB2, SOS1)	7	0.892654	0.00360957	0.311867	1398	CRK	v-crk sarcoma virus CT10 oncogene homolog (avian)	0.288027	-0.540566
2480	CIN85 complex (CIN85, CRK, BCAR1, CBL, PIK3R1, GRB2, SOS1)	7	0.892654	0.00360957	0.311867	2885	GRB2	growth factor receptor-bound protein 2	0.010854	1.96441
2480	CIN85 complex (CIN85, CRK, BCAR1, CBL, PIK3R1, GRB2, SOS1)	7	0.892654	0.00360957	0.311867	5295	PIK3R1	phosphoinositide-3-kinase, regulatory subunit 1 (alpha)	0.837813	-0.0768529
2480	CIN85 complex (CIN85, CRK, BCAR1, CBL, PIK3R1, GRB2, SOS1)	7	0.892654	0.00360957	0.311867	6654	SOS1	son of sevenless homolog 1 (Drosophila)	0.903495	-0.0440745
2480	CIN85 complex (CIN85, CRK, BCAR1, CBL, PIK3R1, GRB2, SOS1)	7	0.892654	0.00360957	0.311867	9564	BCAR1	breast cancer anti-estrogen resistance 1	0.000286887	3.54229
2480	CIN85 complex (CIN85, CRK, BCAR1, CBL, PIK3R1, GRB2, SOS1)	7	0.892654	0.00360957	0.311867	30011	SH3KBP1	SH3-domain kinase binding protein 1	0.970684	0.0129223
1057	DIPA-MCRS1 complex	2	-1.52599	0.00392072	0.314839	10445	MCRS1	microspherule protein 1	0.0439638	-1.3569
1057	DIPA-MCRS1 complex	2	-1.52599	0.00392072	0.314839	11007	CCDC85B	coiled-coil domain containing 85B	0.0201802	-1.69507
5282	CAS-SRC-FAK complex	3	1.34131	0.00400837	0.314839	5747	PTK2	PTK2 protein tyrosine kinase 2	0.139956	0.854008
5282	CAS-SRC-FAK complex	3	1.34131	0.00400837	0.314839	6714	SRC	v-src sarcoma (Schmidt-Ruppin A-2) viral oncogene homolog (avian)	0.424271	-0.372356
5282	CAS-SRC-FAK complex	3	1.34131	0.00400837	0.314839	9564	BCAR1	breast cancer anti-estrogen resistance 1	0.000286887	3.54229
3197	SMAD4-SNO-SKI complex	3	1.3176	0.00462028	0.347123	4089	SMAD4	SMAD family member 4	0.0818302	1.08709
3197	SMAD4-SNO-SKI complex	3	1.3176	0.00462028	0.347123	6497	SKI	v-ski sarcoma viral oncogene homolog (avian)	0.00891692	2.04979
3197	SMAD4-SNO-SKI complex	3	1.3176	0.00462028	0.347123	6498	SKIL	SKI-like oncogene	0.15278	0.815935
3200	SMAD4-SKI complex	2	1.56844	0.00496458	0.35745	4089	SMAD4	SMAD family member 4	0.0818302	1.08709
3200	SMAD4-SKI complex	2	1.56844	0.00496458	0.35745	6497	SKI	v-ski sarcoma viral oncogene homolog (avian)	0.00891692	2.04979
1810	ITGA4-PXN-GIT1 complex	3	-1.21679	0.00517748	0.357867	3676	ITGA4	integrin, alpha 4 (antigen CD49D, alpha 4 subunit of VLA-4 receptor)	0.0576718	-1.23904
1810	ITGA4-PXN-GIT1 complex	3	-1.21679	0.00517748	0.357867	5829	PXN	paxillin	0.16674	-0.77796
1810	ITGA4-PXN-GIT1 complex	3	-1.21679	0.00517748	0.357867	28964	GIT1	G protein-coupled receptor kinase interacting ArfGAP 1	0.023261	-1.63337
1625	FA core complex (Fanconi anemia core complex)	7	0.847004	0.00552223	0.367016	2175	FANCA	Fanconi anemia, complementation group A	0.0299133	1.52414
1625	FA core complex (Fanconi anemia core complex)	7	0.847004	0.00552223	0.367016	2176	FANCC	Fanconi anemia, complementation group C	0.000160155	3.79546
1625	FA core complex (Fanconi anemia core complex)	7	0.847004	0.00552223	0.367016	2178	FANCE	Fanconi anemia, complementation group E	0.46227	-0.335104
1625	FA core complex (Fanconi anemia core complex)	7	0.847004	0.00552223	0.367016	2187	FANCB	Fanconi anemia, complementation group B	0.644439	-0.190818
1625	FA core complex (Fanconi anemia core complex)	7	0.847004	0.00552223	0.367016	2188	FANCF	Fanconi anemia, complementation group F	0.109125	0.962075
1625	FA core complex (Fanconi anemia core complex)	7	0.847004	0.00552223	0.367016	2189	FANCG	Fanconi anemia, complementation group G	0.0819282	-1.08657
1625	FA core complex (Fanconi anemia core complex)	7	0.847004	0.00552223	0.367016	57697	FANCM	Fanconi anemia, complementation group M	0.0549731	1.25985
548	DRIP complex	14	-0.521382	0.00597246	0.368586	5469	MED1	mediator complex subunit 1	0.0914742	-1.0387
548	DRIP complex	14	-0.521382	0.00597246	0.368586	6257	RXRB	retinoid X receptor, beta	0.156533	-0.805395
548	DRIP complex	14	-0.521382	0.00597246	0.368586	7421	VDR	vitamin D (1,25- dihydroxyvitamin D3) receptor	0.0566325	-1.24693
548	DRIP complex	14	-0.521382	0.00597246	0.368586	9282	MED14	mediator complex subunit 14	0.961751	0.0169375
548	DRIP complex	14	-0.521382	0.00597246	0.368586	9439	MED23	mediator complex subunit 23	0.3559	0.448672
548	DRIP complex	14	-0.521382	0.00597246	0.368586	9440	MED17	mediator complex subunit 17	0.430739	-0.365786
548	DRIP complex	14	-0.521382	0.00597246	0.368586	9441	MED26	mediator complex subunit 26	0.105132	-0.978266
548	DRIP complex	14	-0.521382	0.00597246	0.368586	9443	MED7	mediator complex subunit 7	0.144289	0.840767
548	DRIP complex	14	-0.521382	0.00597246	0.368586	9862	MED24	mediator complex subunit 24	0.0126048	-1.89946
548	DRIP complex	14	-0.521382	0.00597246	0.368586	9968	MED12	mediator complex subunit 12	0.0388398	-1.41072
548	DRIP complex	14	-0.521382	0.00597246	0.368586	9969	MED13	mediator complex subunit 13	0.939773	0.0269768
548	DRIP complex	14	-0.521382	0.00597246	0.368586	10001	MED6	mediator complex subunit 6	0.104669	-0.980181
548	DRIP complex	14	-0.521382	0.00597246	0.368586	10025	MED16	mediator complex subunit 16	0.319031	-0.496168
548	DRIP complex	14	-0.521382	0.00597246	0.368586	29079	MED4	mediator complex subunit 4	0.257685	0.588912
549	DRIP complex	14	-0.521382	0.00597246	0.368586	5469	MED1	mediator complex subunit 1	0.0914742	-1.0387
549	DRIP complex	14	-0.521382	0.00597246	0.368586	6257	RXRB	retinoid X receptor, beta	0.156533	-0.805395
549	DRIP complex	14	-0.521382	0.00597246	0.368586	7421	VDR	vitamin D (1,25- dihydroxyvitamin D3) receptor	0.0566325	-1.24693
549	DRIP complex	14	-0.521382	0.00597246	0.368586	9282	MED14	mediator complex subunit 14	0.961751	0.0169375
549	DRIP complex	14	-0.521382	0.00597246	0.368586	9439	MED23	mediator complex subunit 23	0.3559	0.448672
549	DRIP complex	14	-0.521382	0.00597246	0.368586	9440	MED17	mediator complex subunit 17	0.430739	-0.365786
549	DRIP complex	14	-0.521382	0.00597246	0.368586	9441	MED26	mediator complex subunit 26	0.105132	-0.978266
549	DRIP complex	14	-0.521382	0.00597246	0.368586	9443	MED7	mediator complex subunit 7	0.144289	0.840767
549	DRIP complex	14	-0.521382	0.00597246	0.368586	9862	MED24	mediator complex subunit 24	0.0126048	-1.89946
549	DRIP complex	14	-0.521382	0.00597246	0.368586	9968	MED12	mediator complex subunit 12	0.0388398	-1.41072
549	DRIP complex	14	-0.521382	0.00597246	0.368586	9969	MED13	mediator complex subunit 13	0.939773	0.0269768
549	DRIP complex	14	-0.521382	0.00597246	0.368586	10001	MED6	mediator complex subunit 6	0.104669	-0.980181
549	DRIP complex	14	-0.521382	0.00597246	0.368586	10025	MED16	mediator complex subunit 16	0.319031	-0.496168
549	DRIP complex	14	-0.521382	0.00597246	0.368586	29079	MED4	mediator complex subunit 4	0.257685	0.588912
1195	Exon junction complex (mRNA splicing-dependent)	2	-1.41145	0.0068513	0.381057	10250	SRRM1	serine/arginine repetitive matrix 1	0.0137072	-1.86305
1195	Exon junction complex (mRNA splicing-dependent)	2	-1.41145	0.0068513	0.381057	10594	PRPF8	PRP8 pre-mRNA processing factor 8 homolog (S. cerevisiae)	0.109687	-0.959844
1623	FA core complex 1 (Fanconi anemia core complex 1)	5	0.972	0.00699758	0.381057	2175	FANCA	Fanconi anemia, complementation group A	0.0299133	1.52414
1623	FA core complex 1 (Fanconi anemia core complex 1)	5	0.972	0.00699758	0.381057	2176	FANCC	Fanconi anemia, complementation group C	0.000160155	3.79546
1623	FA core complex 1 (Fanconi anemia core complex 1)	5	0.972	0.00699758	0.381057	2178	FANCE	Fanconi anemia, complementation group E	0.46227	-0.335104
1623	FA core complex 1 (Fanconi anemia core complex 1)	5	0.972	0.00699758	0.381057	2188	FANCF	Fanconi anemia, complementation group F	0.109125	0.962075
1623	FA core complex 1 (Fanconi anemia core complex 1)	5	0.972	0.00699758	0.381057	2189	FANCG	Fanconi anemia, complementation group G	0.0819282	-1.08657
3083	Nucleic and chromatin Fanconi complex	5	0.972	0.00699758	0.381057	2175	FANCA	Fanconi anemia, complementation group A	0.0299133	1.52414
3083	Nucleic and chromatin Fanconi complex	5	0.972	0.00699758	0.381057	2176	FANCC	Fanconi anemia, complementation group C	0.000160155	3.79546
3083	Nucleic and chromatin Fanconi complex	5	0.972	0.00699758	0.381057	2178	FANCE	Fanconi anemia, complementation group E	0.46227	-0.335104
3083	Nucleic and chromatin Fanconi complex	5	0.972	0.00699758	0.381057	2188	FANCF	Fanconi anemia, complementation group F	0.109125	0.962075
3083	Nucleic and chromatin Fanconi complex	5	0.972	0.00699758	0.381057	2189	FANCG	Fanconi anemia, complementation group G	0.0819282	-1.08657
1152	FA complex (Fanconi anemia complex)	8	0.766517	0.00726718	0.381057	2175	FANCA	Fanconi anemia, complementation group A	0.0299133	1.52414
1152	FA complex (Fanconi anemia complex)	8	0.766517	0.00726718	0.381057	2176	FANCC	Fanconi anemia, complementation group C	0.000160155	3.79546
1152	FA complex (Fanconi anemia complex)	8	0.766517	0.00726718	0.381057	2178	FANCE	Fanconi anemia, complementation group E	0.46227	-0.335104
1152	FA complex (Fanconi anemia complex)	8	0.766517	0.00726718	0.381057	2187	FANCB	Fanconi anemia, complementation group B	0.644439	-0.190818
1152	FA complex (Fanconi anemia complex)	8	0.766517	0.00726718	0.381057	2188	FANCF	Fanconi anemia, complementation group F	0.109125	0.962075
1152	FA complex (Fanconi anemia complex)	8	0.766517	0.00726718	0.381057	2189	FANCG	Fanconi anemia, complementation group G	0.0819282	-1.08657
1152	FA complex (Fanconi anemia complex)	8	0.766517	0.00726718	0.381057	55120	FANCL	Fanconi anemia, complementation group L	0.626463	0.203105
1152	FA complex (Fanconi anemia complex)	8	0.766517	0.00726718	0.381057	57697	FANCM	Fanconi anemia, complementation group M	0.0549731	1.25985
3552	COG1-COG8-COG5-COG6-COG7 subcomplex	5	0.966686	0.00727714	0.381057	9382	COG1	component of oligomeric golgi complex 1	0.244398	-0.611903
3552	COG1-COG8-COG5-COG6-COG7 subcomplex	5	0.966686	0.00727714	0.381057	10466	COG5	component of oligomeric golgi complex 5	0.00202323	2.69396
3552	COG1-COG8-COG5-COG6-COG7 subcomplex	5	0.966686	0.00727714	0.381057	57511	COG6	component of oligomeric golgi complex 6	0.007646	2.11657
3552	COG1-COG8-COG5-COG6-COG7 subcomplex	5	0.966686	0.00727714	0.381057	84342	COG8	component of oligomeric golgi complex 8	0.0497593	1.30313
3552	COG1-COG8-COG5-COG6-COG7 subcomplex	5	0.966686	0.00727714	0.381057	91949	COG7	component of oligomeric golgi complex 7	0.214627	-0.668315
27	Arp2/3 protein complex	7	0.811036	0.00761581	0.387062	10092	ARPC5	actin related protein 2/3 complex, subunit 5, 16kDa	0.100095	0.999587
27	Arp2/3 protein complex	7	0.811036	0.00761581	0.387062	10093	ARPC4	actin related protein 2/3 complex, subunit 4, 20kDa	0.796126	-0.0990184
27	Arp2/3 protein complex	7	0.811036	0.00761581	0.387062	10094	ARPC3	actin related protein 2/3 complex, subunit 3, 21kDa	0.867421	-0.0617701
27	Arp2/3 protein complex	7	0.811036	0.00761581	0.387062	10095	ARPC1B	actin related protein 2/3 complex, subunit 1B, 41kDa	0.307229	0.512537
27	Arp2/3 protein complex	7	0.811036	0.00761581	0.387062	10096	ACTR3	ARP3 actin-related protein 3 homolog (yeast)	0.500976	0.300183
27	Arp2/3 protein complex	7	0.811036	0.00761581	0.387062	10097	ACTR2	ARP2 actin-related protein 2 homolog (yeast)	0.145674	0.836618
27	Arp2/3 protein complex	7	0.811036	0.00761581	0.387062	10109	ARPC2	actin related protein 2/3 complex, subunit 2, 34kDa	0.00064697	3.18912
1154	DSS1 complex	12	0.620839	0.00818901	0.40369	675	BRCA2	breast cancer 2, early onset	0.193902	0.712419
1154	DSS1 complex	12	0.620839	0.00818901	0.40369	7979	SHFM1	split hand/foot malformation (ectrodactyly) type 1	0.0990996	1.00393
1154	DSS1 complex	12	0.620839	0.00818901	0.40369	25896	INTS7	integrator complex subunit 7	0.925991	-0.033393
1154	DSS1 complex	12	0.620839	0.00818901	0.40369	26512	INTS6	integrator complex subunit 6	0.179139	0.746809
1154	DSS1 complex	12	0.620839	0.00818901	0.40369	54973	CPSF3L	cleavage and polyadenylation specific factor 3-like	0.792908	-0.100777
1154	DSS1 complex	12	0.620839	0.00818901	0.40369	55174	INTS10	integrator complex subunit 10	0.0165424	1.7814
1154	DSS1 complex	12	0.620839	0.00818901	0.40369	55656	INTS8	integrator complex subunit 8	0.245779	0.609456
1154	DSS1 complex	12	0.620839	0.00818901	0.40369	55756	INTS9	integrator complex subunit 9	0.954958	-0.0200159
1154	DSS1 complex	12	0.620839	0.00818901	0.40369	57508	INTS2	integrator complex subunit 2	0.922614	0.03498
1154	DSS1 complex	12	0.620839	0.00818901	0.40369	80789	INTS5	integrator complex subunit 5	0.137335	0.862218
1154	DSS1 complex	12	0.620839	0.00818901	0.40369	92105	INTS4	integrator complex subunit 4	0.515935	0.287405
1154	DSS1 complex	12	0.620839	0.00818901	0.40369	114823	LENG8	leukocyte receptor cluster (LRC) member 8	0.0271869	1.56564
3120	OCT1-OBF1-DNA-TLE1 complex	3	-1.13034	0.00848142	0.40369	5450	POU2AF1	POU class 2 associating factor 1	0.0192959	-1.71453
3120	OCT1-OBF1-DNA-TLE1 complex	3	-1.13034	0.00848142	0.40369	5451	POU2F1	POU class 2 homeobox 1	0.326705	-0.485844
3120	OCT1-OBF1-DNA-TLE1 complex	3	-1.13034	0.00848142	0.40369	7088	TLE1	transducin-like enhancer of split 1 (E(sp1) homolog, Drosophila)	0.0644683	-1.19065
1784	RNF11-SMURF2-STAMBP complex	3	1.20275	0.00892127	0.40369	10617	STAMBP	STAM binding protein	0.00845349	2.07296
1784	RNF11-SMURF2-STAMBP complex	3	1.20275	0.00892127	0.40369	26994	RNF11	ring finger protein 11	0.0239308	1.62104
1784	RNF11-SMURF2-STAMBP complex	3	1.20275	0.00892127	0.40369	64750	SMURF2	SMAD specific E3 ubiquitin protein ligase 2	0.820784	-0.0857712
2397	ITGA7-ITGB1-ITGB1BP3 complex	3	-1.11848	0.00905588	0.40369	3679	ITGA7	integrin, alpha 7	0.0331751	-1.47919
2397	ITGA7-ITGB1-ITGB1BP3 complex	3	-1.11848	0.00905588	0.40369	3688	ITGB1	integrin, beta 1 (fibronectin receptor, beta polypeptide, antigen CD29 includes MDF2, MSK12)	0.650123	-0.187004
2397	ITGA7-ITGB1-ITGB1BP3 complex	3	-1.11848	0.00905588	0.40369	27231	ITGB1BP3	integrin beta 1 binding protein 3	0.0204528	-1.68925
2774	MDC1-H2AFX-TP53BP1 complex	3	-1.11684	0.00913797	0.40369	3014	H2AFX	H2A histone family, member X	0.353175	-0.45201
2774	MDC1-H2AFX-TP53BP1 complex	3	-1.11684	0.00913797	0.40369	7158	TP53BP1	tumor protein p53 binding protein 1	0.0190133	-1.72094
2774	MDC1-H2AFX-TP53BP1 complex	3	-1.11684	0.00913797	0.40369	9656	MDC1	mediator of DNA-damage checkpoint 1	0.0664411	-1.17756
644	ASPP1-SAM68 complex	2	1.43454	0.00934468	0.40369	10657	KHDRBS1	KH domain containing, RNA binding, signal transduction associated 1	0.0573833	1.24121
644	ASPP1-SAM68 complex	2	1.43454	0.00934468	0.40369	23368	PPP1R13B	protein phosphatase 1, regulatory (inhibitor) subunit 13B	0.0235582	1.62786
3186	GRB2-SHP-2 complex, PDGF stimulated	2	1.41672	0.0101296	0.426927	2885	GRB2	growth factor receptor-bound protein 2	0.010854	1.96441
3186	GRB2-SHP-2 complex, PDGF stimulated	2	1.41672	0.0101296	0.426927	5781	PTPN11	protein tyrosine phosphatase, non-receptor type 11	0.1352	0.869022
308	60S ribosomal subunit, cytoplasmic	47	-0.234524	0.0105225	0.432928	4736	RPL10A	ribosomal protein L10a	0.297089	-0.527113
308	60S ribosomal subunit, cytoplasmic	47	-0.234524	0.0105225	0.432928	6122	RPL3	ribosomal protein L3	0.599738	0.222039
308	60S ribosomal subunit, cytoplasmic	47	-0.234524	0.0105225	0.432928	6124	RPL4	ribosomal protein L4	0.135802	-0.867093
308	60S ribosomal subunit, cytoplasmic	47	-0.234524	0.0105225	0.432928	6125	RPL5	ribosomal protein L5	0.757531	0.1206
308	60S ribosomal subunit, cytoplasmic	47	-0.234524	0.0105225	0.432928	6128	RPL6	ribosomal protein L6	0.0266673	-1.57402
308	60S ribosomal subunit, cytoplasmic	47	-0.234524	0.0105225	0.432928	6129	RPL7	ribosomal protein L7	0.214475	-0.668624
308	60S ribosomal subunit, cytoplasmic	47	-0.234524	0.0105225	0.432928	6130	RPL7A	ribosomal protein L7a	0.806912	-0.0931739
308	60S ribosomal subunit, cytoplasmic	47	-0.234524	0.0105225	0.432928	6132	RPL8	ribosomal protein L8	0.529147	-0.276423
308	60S ribosomal subunit, cytoplasmic	47	-0.234524	0.0105225	0.432928	6133	RPL9	ribosomal protein L9	0.191153	0.718619
308	60S ribosomal subunit, cytoplasmic	47	-0.234524	0.0105225	0.432928	6134	RPL10	ribosomal protein L10	0.663641	-0.178067
308	60S ribosomal subunit, cytoplasmic	47	-0.234524	0.0105225	0.432928	6135	RPL11	ribosomal protein L11	0.758885	-0.119824
308	60S ribosomal subunit, cytoplasmic	47	-0.234524	0.0105225	0.432928	6136	RPL12	ribosomal protein L12	0.0180741	-1.74294
308	60S ribosomal subunit, cytoplasmic	47	-0.234524	0.0105225	0.432928	6137	RPL13	ribosomal protein L13	0.0866677	-1.06214
308	60S ribosomal subunit, cytoplasmic	47	-0.234524	0.0105225	0.432928	6138	RPL15	ribosomal protein L15	0.261139	0.583129
308	60S ribosomal subunit, cytoplasmic	47	-0.234524	0.0105225	0.432928	6139	RPL17	ribosomal protein L17	0.698613	-0.155763
308	60S ribosomal subunit, cytoplasmic	47	-0.234524	0.0105225	0.432928	6141	RPL18	ribosomal protein L18	0.175028	-0.756893
308	60S ribosomal subunit, cytoplasmic	47	-0.234524	0.0105225	0.432928	6142	RPL18A	ribosomal protein L18a	0.972571	0.0120788
308	60S ribosomal subunit, cytoplasmic	47	-0.234524	0.0105225	0.432928	6143	RPL19	ribosomal protein L19	0.645659	0.189997
308	60S ribosomal subunit, cytoplasmic	47	-0.234524	0.0105225	0.432928	6144	RPL21	ribosomal protein L21	0.112783	-0.947755
308	60S ribosomal subunit, cytoplasmic	47	-0.234524	0.0105225	0.432928	6146	RPL22	ribosomal protein L22	0.924185	0.0342412
308	60S ribosomal subunit, cytoplasmic	47	-0.234524	0.0105225	0.432928	6147	RPL23A	ribosomal protein L23a	0.225483	0.646886
308	60S ribosomal subunit, cytoplasmic	47	-0.234524	0.0105225	0.432928	6152	RPL24	ribosomal protein L24	0.87833	-0.0563422
308	60S ribosomal subunit, cytoplasmic	47	-0.234524	0.0105225	0.432928	6154	RPL26	ribosomal protein L26	0.565059	-0.247906
308	60S ribosomal subunit, cytoplasmic	47	-0.234524	0.0105225	0.432928	6155	RPL27	ribosomal protein L27	0.015536	1.80866
308	60S ribosomal subunit, cytoplasmic	47	-0.234524	0.0105225	0.432928	6156	RPL30	ribosomal protein L30	0.150191	-0.823356
308	60S ribosomal subunit, cytoplasmic	47	-0.234524	0.0105225	0.432928	6157	RPL27A	ribosomal protein L27a	0.260113	-0.584838
308	60S ribosomal subunit, cytoplasmic	47	-0.234524	0.0105225	0.432928	6158	RPL28	ribosomal protein L28	0.821872	-0.0851958
308	60S ribosomal subunit, cytoplasmic	47	-0.234524	0.0105225	0.432928	6159	RPL29	ribosomal protein L29	0.670181	0.173808
308	60S ribosomal subunit, cytoplasmic	47	-0.234524	0.0105225	0.432928	6160	RPL31	ribosomal protein L31	0.571801	0.242755
308	60S ribosomal subunit, cytoplasmic	47	-0.234524	0.0105225	0.432928	6161	RPL32	ribosomal protein L32	0.0834998	-1.07831
308	60S ribosomal subunit, cytoplasmic	47	-0.234524	0.0105225	0.432928	6164	RPL34	ribosomal protein L34	0.583442	0.234002
308	60S ribosomal subunit, cytoplasmic	47	-0.234524	0.0105225	0.432928	6165	RPL35A	ribosomal protein L35a	0.869337	0.0608116
308	60S ribosomal subunit, cytoplasmic	47	-0.234524	0.0105225	0.432928	6167	RPL37	ribosomal protein L37	0.0990682	-1.00407
308	60S ribosomal subunit, cytoplasmic	47	-0.234524	0.0105225	0.432928	6168	RPL37A	ribosomal protein L37a	0.729928	-0.13672
308	60S ribosomal subunit, cytoplasmic	47	-0.234524	0.0105225	0.432928	6169	RPL38	ribosomal protein L38	0.118606	0.925893
308	60S ribosomal subunit, cytoplasmic	47	-0.234524	0.0105225	0.432928	6170	RPL39	ribosomal protein L39	0.450999	-0.345824
308	60S ribosomal subunit, cytoplasmic	47	-0.234524	0.0105225	0.432928	6171	RPL41	ribosomal protein L41	0.616144	-0.210318
308	60S ribosomal subunit, cytoplasmic	47	-0.234524	0.0105225	0.432928	6173	RPL36A	ribosomal protein L36a	0.807104	-0.0930706
308	60S ribosomal subunit, cytoplasmic	47	-0.234524	0.0105225	0.432928	6175	RPLP0	ribosomal protein, large, P0	0.45605	-0.340987
308	60S ribosomal subunit, cytoplasmic	47	-0.234524	0.0105225	0.432928	6176	RPLP1	ribosomal protein, large, P1	0.0617348	-1.20947
308	60S ribosomal subunit, cytoplasmic	47	-0.234524	0.0105225	0.432928	6181	RPLP2	ribosomal protein, large, P2	0.308373	0.510924
308	60S ribosomal subunit, cytoplasmic	47	-0.234524	0.0105225	0.432928	7311	UBA52	ubiquitin A-52 residue ribosomal protein fusion product 1	0.724332	0.140062
308	60S ribosomal subunit, cytoplasmic	47	-0.234524	0.0105225	0.432928	9045	RPL14	ribosomal protein L14	0.669042	-0.174547
308	60S ribosomal subunit, cytoplasmic	47	-0.234524	0.0105225	0.432928	9349	RPL23	ribosomal protein L23	0.312513	-0.505132
308	60S ribosomal subunit, cytoplasmic	47	-0.234524	0.0105225	0.432928	11224	RPL35	ribosomal protein L35	0.186923	-0.728337
308	60S ribosomal subunit, cytoplasmic	47	-0.234524	0.0105225	0.432928	23521	RPL13A	ribosomal protein L13a	0.20206	-0.69452
308	60S ribosomal subunit, cytoplasmic	47	-0.234524	0.0105225	0.432928	25873	RPL36	ribosomal protein L36	0.438164	-0.358364
876	SNARE complex (VAMP3, STX6, VTI1A)	3	1.1499	0.0118757	0.464724	9341	VAMP3	vesicle-associated membrane protein 3 (cellubrevin)	0.00502758	2.29864
876	SNARE complex (VAMP3, STX6, VTI1A)	3	1.1499	0.0118757	0.464724	10228	STX6	syntaxin 6	0.0650035	1.18706
876	SNARE complex (VAMP3, STX6, VTI1A)	3	1.1499	0.0118757	0.464724	143187	VTI1A	vesicle transport through interaction with t-SNAREs homolog 1A (yeast)	0.920416	-0.0360159
1186	ESCRT-III complex	10	-0.544999	0.0123787	0.464724	5119	CHMP1A	chromatin modifying protein 1A	0.0042282	-2.37384
1186	ESCRT-III complex	10	-0.544999	0.0123787	0.464724	25978	CHMP2B	chromatin modifying protein 2B	0.448699	-0.348045
1186	ESCRT-III complex	10	-0.544999	0.0123787	0.464724	27243	CHMP2A	chromatin modifying protein 2A	0.732503	-0.13519
1186	ESCRT-III complex	10	-0.544999	0.0123787	0.464724	29082	CHMP4A	chromatin modifying protein 4A	0.62038	-0.207342
1186	ESCRT-III complex	10	-0.544999	0.0123787	0.464724	51510	CHMP5	chromatin modifying protein 5	0.416771	0.380103
1186	ESCRT-III complex	10	-0.544999	0.0123787	0.464724	51652	VPS24	vacuolar protein sorting 24 homolog (S. cerevisiae)	0.146793	0.833296
1186	ESCRT-III complex	10	-0.544999	0.0123787	0.464724	57132	CHMP1B	chromatin modifying protein 1B	0.983147	0.00738172
1186	ESCRT-III complex	10	-0.544999	0.0123787	0.464724	79643	CHMP6	chromatin modifying protein 6	0.00371912	-2.42956
1186	ESCRT-III complex	10	-0.544999	0.0123787	0.464724	92421	CHMP4C	chromatin modifying protein 4C	0.206818	-0.684411
1186	ESCRT-III complex	10	-0.544999	0.0123787	0.464724	128866	CHMP4B	chromatin modifying protein 4B	0.321826	-0.492379
1123	WNK1-SPAk complex	2	1.36928	0.0125054	0.464724	27347	STK39	serine threonine kinase 39	0.00722167	2.14136
1123	WNK1-SPAk complex	2	1.36928	0.0125054	0.464724	65125	WNK1	WNK lysine deficient protein kinase 1	0.252809	0.597208
5502	EED-EZH-YY1 polycomb complex	3	1.1398	0.0125281	0.464724	2146	EZH2	enhancer of zeste homolog 2 (Drosophila)	0.171958	0.764579
5502	EED-EZH-YY1 polycomb complex	3	1.1398	0.0125281	0.464724	7528	YY1	YY1 transcription factor	0.863197	-0.0638903
5502	EED-EZH-YY1 polycomb complex	3	1.1398	0.0125281	0.464724	8726	EED	embryonic ectoderm development	0.00191118	2.7187
1108	DNA synthesome complex (15 subunits)	15	-0.425308	0.0140941	0.464724	3978	LIG1	ligase I, DNA, ATP-dependent	0.171765	-0.765065
1108	DNA synthesome complex (15 subunits)	15	-0.425308	0.0140941	0.464724	5111	PCNA	proliferating cell nuclear antigen	0.204163	-0.690023
1108	DNA synthesome complex (15 subunits)	15	-0.425308	0.0140941	0.464724	5422	POLA1	polymerase (DNA directed), alpha 1, catalytic subunit	0.259973	0.585071
1108	DNA synthesome complex (15 subunits)	15	-0.425308	0.0140941	0.464724	5424	POLD1	polymerase (DNA directed), delta 1, catalytic subunit 125kDa	0.0446883	-1.34981
1108	DNA synthesome complex (15 subunits)	15	-0.425308	0.0140941	0.464724	5425	POLD2	polymerase (DNA directed), delta 2, regulatory subunit 50kDa	0.199627	0.699781
1108	DNA synthesome complex (15 subunits)	15	-0.425308	0.0140941	0.464724	5426	POLE	polymerase (DNA directed), epsilon	0.888585	0.0513011
1108	DNA synthesome complex (15 subunits)	15	-0.425308	0.0140941	0.464724	5427	POLE2	polymerase (DNA directed), epsilon 2 (p59 subunit)	0.0732928	-1.13494
1108	DNA synthesome complex (15 subunits)	15	-0.425308	0.0140941	0.464724	5557	PRIM1	primase, DNA, polypeptide 1 (49kDa)	0.90898	0.0414456
1108	DNA synthesome complex (15 subunits)	15	-0.425308	0.0140941	0.464724	5558	PRIM2	primase, DNA, polypeptide 2 (58kDa)	0.215576	0.666399
1108	DNA synthesome complex (15 subunits)	15	-0.425308	0.0140941	0.464724	5981	RFC1	replication factor C (activator 1) 1, 145kDa	0.0457917	-1.33921
1108	DNA synthesome complex (15 subunits)	15	-0.425308	0.0140941	0.464724	10714	POLD3	polymerase (DNA-directed), delta 3, accessory subunit	0.755365	-0.121843
1108	DNA synthesome complex (15 subunits)	15	-0.425308	0.0140941	0.464724	23649	POLA2	polymerase (DNA directed), alpha 2 (70kD subunit)	0.614774	-0.211284
1108	DNA synthesome complex (15 subunits)	15	-0.425308	0.0140941	0.464724	54107	POLE3	polymerase (DNA directed), epsilon 3 (p17 subunit)	0.465767	0.331831
1108	DNA synthesome complex (15 subunits)	15	-0.425308	0.0140941	0.464724	56655	POLE4	polymerase (DNA-directed), epsilon 4 (p12 subunit)	0.198422	-0.70241
1108	DNA synthesome complex (15 subunits)	15	-0.425308	0.0140941	0.464724	57804	POLD4	polymerase (DNA-directed), delta 4	0.0036236	-2.44086
297	PCNA-DNA polymerase delta complex	5	-0.78055	0.0141285	0.464724	5111	PCNA	proliferating cell nuclear antigen	0.204163	-0.690023
297	PCNA-DNA polymerase delta complex	5	-0.78055	0.0141285	0.464724	5424	POLD1	polymerase (DNA directed), delta 1, catalytic subunit 125kDa	0.0446883	-1.34981
297	PCNA-DNA polymerase delta complex	5	-0.78055	0.0141285	0.464724	5425	POLD2	polymerase (DNA directed), delta 2, regulatory subunit 50kDa	0.199627	0.699781
297	PCNA-DNA polymerase delta complex	5	-0.78055	0.0141285	0.464724	10714	POLD3	polymerase (DNA-directed), delta 3, accessory subunit	0.755365	-0.121843
297	PCNA-DNA polymerase delta complex	5	-0.78055	0.0141285	0.464724	57804	POLD4	polymerase (DNA-directed), delta 4	0.0036236	-2.44086
192	PA28-20S proteasome	16	-0.412575	0.0144349	0.464724	5682	PSMA1	proteasome (prosome, macropain) subunit, alpha type, 1	0.374409	0.426654
192	PA28-20S proteasome	16	-0.412575	0.0144349	0.464724	5683	PSMA2	proteasome (prosome, macropain) subunit, alpha type, 2	0.813919	0.0894189
192	PA28-20S proteasome	16	-0.412575	0.0144349	0.464724	5684	PSMA3	proteasome (prosome, macropain) subunit, alpha type, 3	0.765871	0.115844
192	PA28-20S proteasome	16	-0.412575	0.0144349	0.464724	5685	PSMA4	proteasome (prosome, macropain) subunit, alpha type, 4	0.487328	-0.312179
192	PA28-20S proteasome	16	-0.412575	0.0144349	0.464724	5686	PSMA5	proteasome (prosome, macropain) subunit, alpha type, 5	0.83276	-0.0794804
192	PA28-20S proteasome	16	-0.412575	0.0144349	0.464724	5687	PSMA6	proteasome (prosome, macropain) subunit, alpha type, 6	0.0345441	-1.46163
192	PA28-20S proteasome	16	-0.412575	0.0144349	0.464724	5688	PSMA7	proteasome (prosome, macropain) subunit, alpha type, 7	0.10264	-0.988681
192	PA28-20S proteasome	16	-0.412575	0.0144349	0.464724	5689	PSMB1	proteasome (prosome, macropain) subunit, beta type, 1	0.723107	0.140797
192	PA28-20S proteasome	16	-0.412575	0.0144349	0.464724	5690	PSMB2	proteasome (prosome, macropain) subunit, beta type, 2	0.700051	0.15487
192	PA28-20S proteasome	16	-0.412575	0.0144349	0.464724	5691	PSMB3	proteasome (prosome, macropain) subunit, beta type, 3	0.361914	-0.441394
192	PA28-20S proteasome	16	-0.412575	0.0144349	0.464724	5692	PSMB4	proteasome (prosome, macropain) subunit, beta type, 4	0.00398043	-2.40007
192	PA28-20S proteasome	16	-0.412575	0.0144349	0.464724	5693	PSMB5	proteasome (prosome, macropain) subunit, beta type, 5	0.705177	0.151702
192	PA28-20S proteasome	16	-0.412575	0.0144349	0.464724	5694	PSMB6	proteasome (prosome, macropain) subunit, beta type, 6	0.0519086	-1.28476
192	PA28-20S proteasome	16	-0.412575	0.0144349	0.464724	5695	PSMB7	proteasome (prosome, macropain) subunit, beta type, 7	0.8255	0.0832831
192	PA28-20S proteasome	16	-0.412575	0.0144349	0.464724	5720	PSME1	proteasome (prosome, macropain) activator subunit 1 (PA28 alpha)	0.254936	-0.593569
192	PA28-20S proteasome	16	-0.412575	0.0144349	0.464724	5721	PSME2	proteasome (prosome, macropain) activator subunit 2 (PA28 beta)	0.628052	-0.202005
5622	HSP90-CIP1-FKBPL complex	3	1.10397	0.0150985	0.464724	1026	CDKN1A	cyclin-dependent kinase inhibitor 1A (p21, Cip1)	0.0041739	2.37946
5622	HSP90-CIP1-FKBPL complex	3	1.10397	0.0150985	0.464724	3320	HSP90AA1	heat shock protein 90kDa alpha (cytosolic), class A member 1	0.925066	0.0338271
5622	HSP90-CIP1-FKBPL complex	3	1.10397	0.0150985	0.464724	63943	FKBPL	FK506 binding protein like	0.126293	0.898619
5283	tRNA splicing endonuclease	5	0.855541	0.0158443	0.464724	10978	CLP1	CLP1, cleavage and polyadenylation factor I subunit, homolog (S. cerevisiae)	0.120676	0.91838
5283	tRNA splicing endonuclease	5	0.855541	0.0158443	0.464724	79042	TSEN34	tRNA splicing endonuclease 34 homolog (S. cerevisiae)	0.368601	0.433443
5283	tRNA splicing endonuclease	5	0.855541	0.0158443	0.464724	80746	TSEN2	tRNA splicing endonuclease 2 homolog (S. cerevisiae)	0.584541	0.233185
5283	tRNA splicing endonuclease	5	0.855541	0.0158443	0.464724	116461	TSEN15	tRNA splicing endonuclease 15 homolog (S. cerevisiae)	0.00396555	2.4017
5283	tRNA splicing endonuclease	5	0.855541	0.0158443	0.464724	283989	TSEN54	tRNA splicing endonuclease 54 homolog (S. cerevisiae)	0.511682	0.291
5319	CDH1-CKS1B complex	2	1.31241	0.0159774	0.464724	999	CDH1	cadherin 1, type 1, E-cadherin (epithelial)	0.919868	0.0362743
5319	CDH1-CKS1B complex	2	1.31241	0.0159774	0.464724	1163	CKS1B	CDC28 protein kinase regulatory subunit 1B	0.00257905	2.58854
518	AKAP250-PKA-PDE4D complex	4	0.94074	0.0160026	0.464724	5144	PDE4D	phosphodiesterase 4D, cAMP-specific	0.118245	0.927217
518	AKAP250-PKA-PDE4D complex	4	0.94074	0.0160026	0.464724	5567	PRKACB	protein kinase, cAMP-dependent, catalytic, beta	0.00835047	2.07829
518	AKAP250-PKA-PDE4D complex	4	0.94074	0.0160026	0.464724	5568	PRKACG	protein kinase, cAMP-dependent, catalytic, gamma	0.658879	-0.181194
518	AKAP250-PKA-PDE4D complex	4	0.94074	0.0160026	0.464724	9590	AKAP12	A kinase (PRKA) anchor protein 12	0.115174	0.938646
621	AKAP250-PKA-PDE4D complex	4	0.94074	0.0160026	0.464724	5144	PDE4D	phosphodiesterase 4D, cAMP-specific	0.118245	0.927217
621	AKAP250-PKA-PDE4D complex	4	0.94074	0.0160026	0.464724	5567	PRKACB	protein kinase, cAMP-dependent, catalytic, beta	0.00835047	2.07829
621	AKAP250-PKA-PDE4D complex	4	0.94074	0.0160026	0.464724	5568	PRKACG	protein kinase, cAMP-dependent, catalytic, gamma	0.658879	-0.181194
621	AKAP250-PKA-PDE4D complex	4	0.94074	0.0160026	0.464724	9590	AKAP12	A kinase (PRKA) anchor protein 12	0.115174	0.938646
1539	G protein complex (GNG2, GNB2L1, RAF1)	3	1.09231	0.0160275	0.464724	5894	RAF1	v-raf-1 murine leukemia viral oncogene homolog 1	0.213638	0.670321
1539	G protein complex (GNG2, GNB2L1, RAF1)	3	1.09231	0.0160275	0.464724	10399	GNB2L1	guanine nucleotide binding protein (G protein), beta polypeptide 2-like 1	0.959976	0.0177397
1539	G protein complex (GNG2, GNB2L1, RAF1)	3	1.09231	0.0160275	0.464724	54331	GNG2	guanine nucleotide binding protein (G protein), gamma 2	0.00257715	2.58886
535	TRAP complex	16	-0.401754	0.0164167	0.464724	892	CCNC	cyclin C	0.244027	0.612563
535	TRAP complex	16	-0.401754	0.0164167	0.464724	5469	MED1	mediator complex subunit 1	0.0914742	-1.0387
535	TRAP complex	16	-0.401754	0.0164167	0.464724	7067	THRA	thyroid hormone receptor, alpha (erythroblastic leukemia viral (v-erb-a) oncogene homolog, avian)	0.0901389	-1.04509
535	TRAP complex	16	-0.401754	0.0164167	0.464724	9282	MED14	mediator complex subunit 14	0.961751	0.0169375
535	TRAP complex	16	-0.401754	0.0164167	0.464724	9412	MED21	mediator complex subunit 21	0.329244	0.482482
535	TRAP complex	16	-0.401754	0.0164167	0.464724	9440	MED17	mediator complex subunit 17	0.430739	-0.365786
535	TRAP complex	16	-0.401754	0.0164167	0.464724	9442	MED27	mediator complex subunit 27	0.0643513	-1.19144
535	TRAP complex	16	-0.401754	0.0164167	0.464724	9862	MED24	mediator complex subunit 24	0.0126048	-1.89946
535	TRAP complex	16	-0.401754	0.0164167	0.464724	9967	THRAP3	thyroid hormone receptor associated protein 3	0.769626	0.11372
535	TRAP complex	16	-0.401754	0.0164167	0.464724	9968	MED12	mediator complex subunit 12	0.0388398	-1.41072
535	TRAP complex	16	-0.401754	0.0164167	0.464724	9969	MED13	mediator complex subunit 13	0.939773	0.0269768
535	TRAP complex	16	-0.401754	0.0164167	0.464724	10001	MED6	mediator complex subunit 6	0.104669	-0.980181
535	TRAP complex	16	-0.401754	0.0164167	0.464724	10025	MED16	mediator complex subunit 16	0.319031	-0.496168
535	TRAP complex	16	-0.401754	0.0164167	0.464724	29079	MED4	mediator complex subunit 4	0.257685	0.588912
535	TRAP complex	16	-0.401754	0.0164167	0.464724	51003	MED31	mediator complex subunit 31	0.998027	0.000857605
535	TRAP complex	16	-0.401754	0.0164167	0.464724	84246	MED10	mediator complex subunit 10	0.696566	0.157038
3848	TCL1(trimer)-AKT2 complex	2	-1.21475	0.0165003	0.464724	208	AKT2	v-akt murine thymoma viral oncogene homolog 2	0.980011	-0.00876891
3848	TCL1(trimer)-AKT2 complex	2	-1.21475	0.0165003	0.464724	8115	TCL1A	T-cell leukemia/lymphoma 1A	0.00379543	-2.42074
2535	SLP-76-Cbl-Grb2-Shc complex, Fc receptor gamma-R1 stimulated	4	0.934074	0.0166508	0.464724	867	CBL	Cas-Br-M (murine) ecotropic retroviral transforming sequence	0.0406959	1.39045
2535	SLP-76-Cbl-Grb2-Shc complex, Fc receptor gamma-R1 stimulated	4	0.934074	0.0166508	0.464724	2885	GRB2	growth factor receptor-bound protein 2	0.010854	1.96441
2535	SLP-76-Cbl-Grb2-Shc complex, Fc receptor gamma-R1 stimulated	4	0.934074	0.0166508	0.464724	3937	LCP2	lymphocyte cytosolic protein 2 (SH2 domain containing leukocyte protein of 76kDa)	0.123834	0.907161
2535	SLP-76-Cbl-Grb2-Shc complex, Fc receptor gamma-R1 stimulated	4	0.934074	0.0166508	0.464724	6464	SHC1	SHC (Src homology 2 domain containing) transforming protein 1	0.29804	-0.525725
194	PA28gamma-20S proteasome	15	-0.4093	0.0169817	0.464724	5682	PSMA1	proteasome (prosome, macropain) subunit, alpha type, 1	0.374409	0.426654
194	PA28gamma-20S proteasome	15	-0.4093	0.0169817	0.464724	5683	PSMA2	proteasome (prosome, macropain) subunit, alpha type, 2	0.813919	0.0894189
194	PA28gamma-20S proteasome	15	-0.4093	0.0169817	0.464724	5684	PSMA3	proteasome (prosome, macropain) subunit, alpha type, 3	0.765871	0.115844
194	PA28gamma-20S proteasome	15	-0.4093	0.0169817	0.464724	5685	PSMA4	proteasome (prosome, macropain) subunit, alpha type, 4	0.487328	-0.312179
194	PA28gamma-20S proteasome	15	-0.4093	0.0169817	0.464724	5686	PSMA5	proteasome (prosome, macropain) subunit, alpha type, 5	0.83276	-0.0794804
194	PA28gamma-20S proteasome	15	-0.4093	0.0169817	0.464724	5687	PSMA6	proteasome (prosome, macropain) subunit, alpha type, 6	0.0345441	-1.46163
194	PA28gamma-20S proteasome	15	-0.4093	0.0169817	0.464724	5688	PSMA7	proteasome (prosome, macropain) subunit, alpha type, 7	0.10264	-0.988681
194	PA28gamma-20S proteasome	15	-0.4093	0.0169817	0.464724	5689	PSMB1	proteasome (prosome, macropain) subunit, beta type, 1	0.723107	0.140797
194	PA28gamma-20S proteasome	15	-0.4093	0.0169817	0.464724	5690	PSMB2	proteasome (prosome, macropain) subunit, beta type, 2	0.700051	0.15487
194	PA28gamma-20S proteasome	15	-0.4093	0.0169817	0.464724	5691	PSMB3	proteasome (prosome, macropain) subunit, beta type, 3	0.361914	-0.441394
194	PA28gamma-20S proteasome	15	-0.4093	0.0169817	0.464724	5692	PSMB4	proteasome (prosome, macropain) subunit, beta type, 4	0.00398043	-2.40007
194	PA28gamma-20S proteasome	15	-0.4093	0.0169817	0.464724	5693	PSMB5	proteasome (prosome, macropain) subunit, beta type, 5	0.705177	0.151702
194	PA28gamma-20S proteasome	15	-0.4093	0.0169817	0.464724	5694	PSMB6	proteasome (prosome, macropain) subunit, beta type, 6	0.0519086	-1.28476
194	PA28gamma-20S proteasome	15	-0.4093	0.0169817	0.464724	5695	PSMB7	proteasome (prosome, macropain) subunit, beta type, 7	0.8255	0.0832831
194	PA28gamma-20S proteasome	15	-0.4093	0.0169817	0.464724	10197	PSME3	proteasome (prosome, macropain) activator subunit 3 (PA28 gamma; Ki)	0.463583	-0.333872
3213	ULBP1-KLRK1-HCST complex	3	-0.998678	0.0170414	0.464724	10870	HCST	hematopoietic cell signal transducer	0.0351907	-1.45357
3213	ULBP1-KLRK1-HCST complex	3	-0.998678	0.0170414	0.464724	22914	KLRK1	killer cell lectin-like receptor subfamily K, member 1	0.589846	0.229262
3213	ULBP1-KLRK1-HCST complex	3	-0.998678	0.0170414	0.464724	80329	ULBP1	UL16 binding protein 1	0.0169152	-1.77172
5714	eNOS-CAV1 complex	2	-1.20521	0.0171757	0.464724	857	CAV1	caveolin 1, caveolae protein, 22kDa	0.144766	-0.839333
5714	eNOS-CAV1 complex	2	-1.20521	0.0171757	0.464724	4846	NOS3	nitric oxide synthase 3 (endothelial cell)	0.0268482	-1.57109
1298	MKK4-ARRB2-JNK3 complex	3	-0.995588	0.0173094	0.464724	409	ARRB2	arrestin, beta 2	0.00309837	-2.50887
1298	MKK4-ARRB2-JNK3 complex	3	-0.995588	0.0173094	0.464724	5602	MAPK10	mitogen-activated protein kinase 10	0.563985	-0.248733
1298	MKK4-ARRB2-JNK3 complex	3	-0.995588	0.0173094	0.464724	6416	MAP2K4	mitogen-activated protein kinase kinase 4	0.589979	-0.229164
5266	TNF-alpha/NF-kappa B signaling complex 6	14	-0.42895	0.0175961	0.464724	1147	CHUK	conserved helix-loop-helix ubiquitous kinase	0.315969	0.500355
5266	TNF-alpha/NF-kappa B signaling complex 6	14	-0.42895	0.0175961	0.464724	2091	FBL	fibrillarin	0.426355	-0.370229
5266	TNF-alpha/NF-kappa B signaling complex 6	14	-0.42895	0.0175961	0.464724	3320	HSP90AA1	heat shock protein 90kDa alpha (cytosolic), class A member 1	0.925066	0.0338271
5266	TNF-alpha/NF-kappa B signaling complex 6	14	-0.42895	0.0175961	0.464724	3326	HSP90AB1	heat shock protein 90kDa alpha (cytosolic), class B member 1	0.0347186	-1.45944
5266	TNF-alpha/NF-kappa B signaling complex 6	14	-0.42895	0.0175961	0.464724	3551	IKBKB	inhibitor of kappa light polypeptide gene enhancer in B-cells, kinase beta	0.252769	0.597276
5266	TNF-alpha/NF-kappa B signaling complex 6	14	-0.42895	0.0175961	0.464724	6124	RPL4	ribosomal protein L4	0.135802	-0.867093
5266	TNF-alpha/NF-kappa B signaling complex 6	14	-0.42895	0.0175961	0.464724	6128	RPL6	ribosomal protein L6	0.0266673	-1.57402
5266	TNF-alpha/NF-kappa B signaling complex 6	14	-0.42895	0.0175961	0.464724	6132	RPL8	ribosomal protein L8	0.529147	-0.276423
5266	TNF-alpha/NF-kappa B signaling complex 6	14	-0.42895	0.0175961	0.464724	6156	RPL30	ribosomal protein L30	0.150191	-0.823356
5266	TNF-alpha/NF-kappa B signaling complex 6	14	-0.42895	0.0175961	0.464724	6205	RPS11	ribosomal protein S11	0.818289	-0.0870934
5266	TNF-alpha/NF-kappa B signaling complex 6	14	-0.42895	0.0175961	0.464724	6207	RPS13	ribosomal protein S13	0.0422796	-1.37387
5266	TNF-alpha/NF-kappa B signaling complex 6	14	-0.42895	0.0175961	0.464724	8517	IKBKG	inhibitor of kappa light polypeptide gene enhancer in B-cells, kinase gamma	0.508047	-0.294096
5266	TNF-alpha/NF-kappa B signaling complex 6	14	-0.42895	0.0175961	0.464724	9020	MAP3K14	mitogen-activated protein kinase kinase kinase 14	0.337599	0.471599
5266	TNF-alpha/NF-kappa B signaling complex 6	14	-0.42895	0.0175961	0.464724	11140	CDC37	cell division cycle 37 homolog (S. cerevisiae)	0.32905	-0.482738
746	C/EBPalpha-HNF6 complex	2	-1.19519	0.0179097	0.464724	1050	CEBPA	CCAAT/enhancer binding protein (C/EBP), alpha	0.0425064	-1.37155
746	C/EBPalpha-HNF6 complex	2	-1.19519	0.0179097	0.464724	3175	ONECUT1	one cut homeobox 1	0.0957544	-1.01884
2859	ING5 complex	11	-0.486709	0.018045	0.464724	7862	BRPF1	bromodomain and PHD finger containing, 1	0.00161058	-2.79302
2859	ING5 complex	11	-0.486709	0.018045	0.464724	7994	MYST3	MYST histone acetyltransferase (monocytic leukemia) 3	0.916979	-0.0376407
2859	ING5 complex	11	-0.486709	0.018045	0.464724	9767	PHF16	PHD finger protein 16	0.72164	-0.141679
2859	ING5 complex	11	-0.486709	0.018045	0.464724	11143	MYST2	MYST histone acetyltransferase 2	0.34105	-0.467182
2859	ING5 complex	11	-0.486709	0.018045	0.464724	23338	PHF15	PHD finger protein 15	0.147276	-0.831867
2859	ING5 complex	11	-0.486709	0.018045	0.464724	23522	MYST4	MYST histone acetyltransferase (monocytic leukemia) 4	0.993347	-0.00289896
2859	ING5 complex	11	-0.486709	0.018045	0.464724	23774	BRD1	bromodomain containing 1	0.0241674	1.61677
2859	ING5 complex	11	-0.486709	0.018045	0.464724	27154	BRPF3	bromodomain and PHD finger containing, 3	0.687937	-0.162452
2859	ING5 complex	11	-0.486709	0.018045	0.464724	64769	MEAF6	MYST/Esa1-associated factor 6	0.433303	-0.363209
2859	ING5 complex	11	-0.486709	0.018045	0.464724	79960	PHF17	PHD finger protein 17	0.0234133	-1.63054
2859	ING5 complex	11	-0.486709	0.018045	0.464724	84289	ING5	inhibitor of growth family, member 5	0.288347	-0.540085
1028	HNF4A-SUB1 complex	2	-1.19296	0.018077	0.464724	3172	HNF4A	hepatocyte nuclear factor 4, alpha	0.00486093	-2.31328
1028	HNF4A-SUB1 complex	2	-1.19296	0.018077	0.464724	10923	SUB1	SUB1 homolog (S. cerevisiae)	0.845984	-0.0726377
1557	NMI-POLR1B-RRN3 complex	3	1.05978	0.0188817	0.464724	9111	NMI	N-myc (and STAT) interactor	0.154439	0.811243
1557	NMI-POLR1B-RRN3 complex	3	1.05978	0.0188817	0.464724	54700	RRN3	RRN3 RNA polymerase I transcription factor homolog (S. cerevisiae)	0.0230521	1.63729
1557	NMI-POLR1B-RRN3 complex	3	1.05978	0.0188817	0.464724	84172	POLR1B	polymerase (RNA) I polypeptide B, 128kDa	0.185861	0.730812
517	Kinase-scaffold-phosphatase complex, PKA-AKAP79-CaN	3	1.04347	0.020469	0.464724	5530	PPP3CA	protein phosphatase 3, catalytic subunit, alpha isozyme	0.00564917	2.24802
517	Kinase-scaffold-phosphatase complex, PKA-AKAP79-CaN	3	1.04347	0.020469	0.464724	5576	PRKAR2A	protein kinase, cAMP-dependent, regulatory, type II, alpha	0.750408	0.124702
517	Kinase-scaffold-phosphatase complex, PKA-AKAP79-CaN	3	1.04347	0.020469	0.464724	9495	AKAP5	A kinase (PRKA) anchor protein 5	0.174708	0.757688
191	20S proteasome	14	-0.414687	0.0205143	0.464724	5682	PSMA1	proteasome (prosome, macropain) subunit, alpha type, 1	0.374409	0.426654
191	20S proteasome	14	-0.414687	0.0205143	0.464724	5683	PSMA2	proteasome (prosome, macropain) subunit, alpha type, 2	0.813919	0.0894189
191	20S proteasome	14	-0.414687	0.0205143	0.464724	5684	PSMA3	proteasome (prosome, macropain) subunit, alpha type, 3	0.765871	0.115844
191	20S proteasome	14	-0.414687	0.0205143	0.464724	5685	PSMA4	proteasome (prosome, macropain) subunit, alpha type, 4	0.487328	-0.312179
191	20S proteasome	14	-0.414687	0.0205143	0.464724	5686	PSMA5	proteasome (prosome, macropain) subunit, alpha type, 5	0.83276	-0.0794804
191	20S proteasome	14	-0.414687	0.0205143	0.464724	5687	PSMA6	proteasome (prosome, macropain) subunit, alpha type, 6	0.0345441	-1.46163
191	20S proteasome	14	-0.414687	0.0205143	0.464724	5688	PSMA7	proteasome (prosome, macropain) subunit, alpha type, 7	0.10264	-0.988681
191	20S proteasome	14	-0.414687	0.0205143	0.464724	5689	PSMB1	proteasome (prosome, macropain) subunit, beta type, 1	0.723107	0.140797
191	20S proteasome	14	-0.414687	0.0205143	0.464724	5690	PSMB2	proteasome (prosome, macropain) subunit, beta type, 2	0.700051	0.15487
191	20S proteasome	14	-0.414687	0.0205143	0.464724	5691	PSMB3	proteasome (prosome, macropain) subunit, beta type, 3	0.361914	-0.441394
191	20S proteasome	14	-0.414687	0.0205143	0.464724	5692	PSMB4	proteasome (prosome, macropain) subunit, beta type, 4	0.00398043	-2.40007
191	20S proteasome	14	-0.414687	0.0205143	0.464724	5693	PSMB5	proteasome (prosome, macropain) subunit, beta type, 5	0.705177	0.151702
191	20S proteasome	14	-0.414687	0.0205143	0.464724	5694	PSMB6	proteasome (prosome, macropain) subunit, beta type, 6	0.0519086	-1.28476
191	20S proteasome	14	-0.414687	0.0205143	0.464724	5695	PSMB7	proteasome (prosome, macropain) subunit, beta type, 7	0.8255	0.0832831
2719	Casein kinase II-HMG1 complex	4	0.898337	0.0205219	0.464724	1457	CSNK2A1	casein kinase 2, alpha 1 polypeptide	0.302952	0.518626
2719	Casein kinase II-HMG1 complex	4	0.898337	0.0205219	0.464724	1459	CSNK2A2	casein kinase 2, alpha prime polypeptide	0.0226628	1.64469
2719	Casein kinase II-HMG1 complex	4	0.898337	0.0205219	0.464724	1460	CSNK2B	casein kinase 2, beta polypeptide	0.389724	-0.409243
2719	Casein kinase II-HMG1 complex	4	0.898337	0.0205219	0.464724	3146	HMGB1	high-mobility group box 1	0.0144784	1.83928
875	SNARE complex (VAMP3, VAMP4, STX16)	3	1.04242	0.020575	0.464724	8674	VAMP4	vesicle-associated membrane protein 4	0.927398	0.0327337
875	SNARE complex (VAMP3, VAMP4, STX16)	3	1.04242	0.020575	0.464724	8675	STX16	syntaxin 16	0.160001	0.795878
875	SNARE complex (VAMP3, VAMP4, STX16)	3	1.04242	0.020575	0.464724	9341	VAMP3	vesicle-associated membrane protein 3 (cellubrevin)	0.00502758	2.29864
1897	RAPTOR-mTOR complex	3	-0.955878	0.0210852	0.464724	2475	MTOR	mechanistic target of rapamycin (serine/threonine kinase)	0.916124	-0.0380458
1897	RAPTOR-mTOR complex	3	-0.955878	0.0210852	0.464724	57521	RPTOR	regulatory associated protein of MTOR, complex 1	0.494494	-0.305839
1897	RAPTOR-mTOR complex	3	-0.955878	0.0210852	0.464724	64223	MLST8	MTOR associated protein, LST8 homolog (S. cerevisiae)	0.00299399	-2.52375
2970	mTORC1 complex (mTOR/FRAP1, LST8, RAPTOR)	3	-0.955878	0.0210852	0.464724	2475	MTOR	mechanistic target of rapamycin (serine/threonine kinase)	0.916124	-0.0380458
2970	mTORC1 complex (mTOR/FRAP1, LST8, RAPTOR)	3	-0.955878	0.0210852	0.464724	57521	RPTOR	regulatory associated protein of MTOR, complex 1	0.494494	-0.305839
2970	mTORC1 complex (mTOR/FRAP1, LST8, RAPTOR)	3	-0.955878	0.0210852	0.464724	64223	MLST8	MTOR associated protein, LST8 homolog (S. cerevisiae)	0.00299399	-2.52375
2990	mTOR-signaling complex (FRAP1/mTOR, GBL, RAPTOR)	3	-0.955878	0.0210852	0.464724	2475	MTOR	mechanistic target of rapamycin (serine/threonine kinase)	0.916124	-0.0380458
2990	mTOR-signaling complex (FRAP1/mTOR, GBL, RAPTOR)	3	-0.955878	0.0210852	0.464724	57521	RPTOR	regulatory associated protein of MTOR, complex 1	0.494494	-0.305839
2990	mTOR-signaling complex (FRAP1/mTOR, GBL, RAPTOR)	3	-0.955878	0.0210852	0.464724	64223	MLST8	MTOR associated protein, LST8 homolog (S. cerevisiae)	0.00299399	-2.52375
3980	mTOR-RAPTOR complex	3	-0.955878	0.0210852	0.464724	2475	MTOR	mechanistic target of rapamycin (serine/threonine kinase)	0.916124	-0.0380458
3980	mTOR-RAPTOR complex	3	-0.955878	0.0210852	0.464724	57521	RPTOR	regulatory associated protein of MTOR, complex 1	0.494494	-0.305839
3980	mTOR-RAPTOR complex	3	-0.955878	0.0210852	0.464724	64223	MLST8	MTOR associated protein, LST8 homolog (S. cerevisiae)	0.00299399	-2.52375
786	MR-UBC9-SRC1 complex	3	1.03689	0.0211404	0.464724	4306	NR3C2	nuclear receptor subfamily 3, group C, member 2	0.0961128	1.01722
786	MR-UBC9-SRC1 complex	3	1.03689	0.0211404	0.464724	5530	PPP3CA	protein phosphatase 3, catalytic subunit, alpha isozyme	0.00564917	2.24802
786	MR-UBC9-SRC1 complex	3	1.03689	0.0211404	0.464724	8648	NCOA1	nuclear receptor coactivator 1	0.700541	-0.154566
3739	SKI-SMAD2-SMAD4 pentameric complex	3	1.03468	0.0213701	0.464724	4087	SMAD2	SMAD family member 2	0.927187	-0.0328329
3739	SKI-SMAD2-SMAD4 pentameric complex	3	1.03468	0.0213701	0.464724	4089	SMAD4	SMAD family member 4	0.0818302	1.08709
3739	SKI-SMAD2-SMAD4 pentameric complex	3	1.03468	0.0213701	0.464724	6497	SKI	v-ski sarcoma viral oncogene homolog (avian)	0.00891692	2.04979
547	SMCC complex	14	-0.410374	0.0214738	0.464724	892	CCNC	cyclin C	0.244027	0.612563
547	SMCC complex	14	-0.410374	0.0214738	0.464724	1024	CDK8	cyclin-dependent kinase 8	0.624651	-0.204363
547	SMCC complex	14	-0.410374	0.0214738	0.464724	5469	MED1	mediator complex subunit 1	0.0914742	-1.0387
547	SMCC complex	14	-0.410374	0.0214738	0.464724	9282	MED14	mediator complex subunit 14	0.961751	0.0169375
547	SMCC complex	14	-0.410374	0.0214738	0.464724	9412	MED21	mediator complex subunit 21	0.329244	0.482482
547	SMCC complex	14	-0.410374	0.0214738	0.464724	9440	MED17	mediator complex subunit 17	0.430739	-0.365786
547	SMCC complex	14	-0.410374	0.0214738	0.464724	9442	MED27	mediator complex subunit 27	0.0643513	-1.19144
547	SMCC complex	14	-0.410374	0.0214738	0.464724	9862	MED24	mediator complex subunit 24	0.0126048	-1.89946
547	SMCC complex	14	-0.410374	0.0214738	0.464724	9967	THRAP3	thyroid hormone receptor associated protein 3	0.769626	0.11372
547	SMCC complex	14	-0.410374	0.0214738	0.464724	9968	MED12	mediator complex subunit 12	0.0388398	-1.41072
547	SMCC complex	14	-0.410374	0.0214738	0.464724	9969	MED13	mediator complex subunit 13	0.939773	0.0269768
547	SMCC complex	14	-0.410374	0.0214738	0.464724	10001	MED6	mediator complex subunit 6	0.104669	-0.980181
547	SMCC complex	14	-0.410374	0.0214738	0.464724	10025	MED16	mediator complex subunit 16	0.319031	-0.496168
547	SMCC complex	14	-0.410374	0.0214738	0.464724	29079	MED4	mediator complex subunit 4	0.257685	0.588912
874	SNARE complex (VAMP3, VAMP4, VAMP8, STX6)	4	0.883262	0.0223701	0.464724	8673	VAMP8	vesicle-associated membrane protein 8 (endobrevin)	0.966914	0.0146123
874	SNARE complex (VAMP3, VAMP4, VAMP8, STX6)	4	0.883262	0.0223701	0.464724	8674	VAMP4	vesicle-associated membrane protein 4	0.927398	0.0327337
874	SNARE complex (VAMP3, VAMP4, VAMP8, STX6)	4	0.883262	0.0223701	0.464724	9341	VAMP3	vesicle-associated membrane protein 3 (cellubrevin)	0.00502758	2.29864
874	SNARE complex (VAMP3, VAMP4, VAMP8, STX6)	4	0.883262	0.0223701	0.464724	10228	STX6	syntaxin 6	0.0650035	1.18706
3917	Ternary complex (GATA4, SRF, MYOCD)	3	-0.942937	0.0224573	0.464724	2626	GATA4	GATA binding protein 4	0.0664749	-1.17734
3917	Ternary complex (GATA4, SRF, MYOCD)	3	-0.942937	0.0224573	0.464724	6722	SRF	serum response factor (c-fos serum response element-binding transcription factor)	0.0344461	-1.46286
3917	Ternary complex (GATA4, SRF, MYOCD)	3	-0.942937	0.0224573	0.464724	93649	MYOCD	myocardin	0.647724	-0.18861
1893	mTOR-RICTOR complex	3	-0.941534	0.0226105	0.464724	2475	MTOR	mechanistic target of rapamycin (serine/threonine kinase)	0.916124	-0.0380458
1893	mTOR-RICTOR complex	3	-0.941534	0.0226105	0.464724	64223	MLST8	MTOR associated protein, LST8 homolog (S. cerevisiae)	0.00299399	-2.52375
1893	mTOR-RICTOR complex	3	-0.941534	0.0226105	0.464724	253260	RICTOR	RPTOR independent companion of MTOR, complex 2	0.546001	-0.262807
1895	RICTOR-mTOR complex	3	-0.941534	0.0226105	0.464724	2475	MTOR	mechanistic target of rapamycin (serine/threonine kinase)	0.916124	-0.0380458
1895	RICTOR-mTOR complex	3	-0.941534	0.0226105	0.464724	64223	MLST8	MTOR associated protein, LST8 homolog (S. cerevisiae)	0.00299399	-2.52375
1895	RICTOR-mTOR complex	3	-0.941534	0.0226105	0.464724	253260	RICTOR	RPTOR independent companion of MTOR, complex 2	0.546001	-0.262807
2969	mTORC2 complex (mTOR/FRAP1, LST8, mAVO3/RICTOR)	3	-0.941534	0.0226105	0.464724	2475	MTOR	mechanistic target of rapamycin (serine/threonine kinase)	0.916124	-0.0380458
2969	mTORC2 complex (mTOR/FRAP1, LST8, mAVO3/RICTOR)	3	-0.941534	0.0226105	0.464724	64223	MLST8	MTOR associated protein, LST8 homolog (S. cerevisiae)	0.00299399	-2.52375
2969	mTORC2 complex (mTOR/FRAP1, LST8, mAVO3/RICTOR)	3	-0.941534	0.0226105	0.464724	253260	RICTOR	RPTOR independent companion of MTOR, complex 2	0.546001	-0.262807
1099	DNA synthesome complex (17 subunits)	17	-0.362739	0.0228597	0.464724	5111	PCNA	proliferating cell nuclear antigen	0.204163	-0.690023
1099	DNA synthesome complex (17 subunits)	17	-0.362739	0.0228597	0.464724	5422	POLA1	polymerase (DNA directed), alpha 1, catalytic subunit	0.259973	0.585071
1099	DNA synthesome complex (17 subunits)	17	-0.362739	0.0228597	0.464724	5424	POLD1	polymerase (DNA directed), delta 1, catalytic subunit 125kDa	0.0446883	-1.34981
1099	DNA synthesome complex (17 subunits)	17	-0.362739	0.0228597	0.464724	5425	POLD2	polymerase (DNA directed), delta 2, regulatory subunit 50kDa	0.199627	0.699781
1099	DNA synthesome complex (17 subunits)	17	-0.362739	0.0228597	0.464724	5426	POLE	polymerase (DNA directed), epsilon	0.888585	0.0513011
1099	DNA synthesome complex (17 subunits)	17	-0.362739	0.0228597	0.464724	5427	POLE2	polymerase (DNA directed), epsilon 2 (p59 subunit)	0.0732928	-1.13494
1099	DNA synthesome complex (17 subunits)	17	-0.362739	0.0228597	0.464724	5557	PRIM1	primase, DNA, polypeptide 1 (49kDa)	0.90898	0.0414456
1099	DNA synthesome complex (17 subunits)	17	-0.362739	0.0228597	0.464724	5558	PRIM2	primase, DNA, polypeptide 2 (58kDa)	0.215576	0.666399
1099	DNA synthesome complex (17 subunits)	17	-0.362739	0.0228597	0.464724	5981	RFC1	replication factor C (activator 1) 1, 145kDa	0.0457917	-1.33921
1099	DNA synthesome complex (17 subunits)	17	-0.362739	0.0228597	0.464724	6117	RPA1	replication protein A1, 70kDa	0.508755	-0.293491
1099	DNA synthesome complex (17 subunits)	17	-0.362739	0.0228597	0.464724	7150	TOP1	topoisomerase (DNA) I	0.215392	-0.666771
1099	DNA synthesome complex (17 subunits)	17	-0.362739	0.0228597	0.464724	7155	TOP2B	topoisomerase (DNA) II beta 180kDa	0.390614	0.408252
1099	DNA synthesome complex (17 subunits)	17	-0.362739	0.0228597	0.464724	10714	POLD3	polymerase (DNA-directed), delta 3, accessory subunit	0.755365	-0.121843
1099	DNA synthesome complex (17 subunits)	17	-0.362739	0.0228597	0.464724	23649	POLA2	polymerase (DNA directed), alpha 2 (70kD subunit)	0.614774	-0.211284
1099	DNA synthesome complex (17 subunits)	17	-0.362739	0.0228597	0.464724	54107	POLE3	polymerase (DNA directed), epsilon 3 (p17 subunit)	0.465767	0.331831
1099	DNA synthesome complex (17 subunits)	17	-0.362739	0.0228597	0.464724	56655	POLE4	polymerase (DNA-directed), epsilon 4 (p12 subunit)	0.198422	-0.70241
1099	DNA synthesome complex (17 subunits)	17	-0.362739	0.0228597	0.464724	57804	POLD4	polymerase (DNA-directed), delta 4	0.0036236	-2.44086
1111	DNA synthesome complex (17 subunits)	17	-0.362739	0.0228597	0.464724	5111	PCNA	proliferating cell nuclear antigen	0.204163	-0.690023
1111	DNA synthesome complex (17 subunits)	17	-0.362739	0.0228597	0.464724	5422	POLA1	polymerase (DNA directed), alpha 1, catalytic subunit	0.259973	0.585071
1111	DNA synthesome complex (17 subunits)	17	-0.362739	0.0228597	0.464724	5424	POLD1	polymerase (DNA directed), delta 1, catalytic subunit 125kDa	0.0446883	-1.34981
1111	DNA synthesome complex (17 subunits)	17	-0.362739	0.0228597	0.464724	5425	POLD2	polymerase (DNA directed), delta 2, regulatory subunit 50kDa	0.199627	0.699781
1111	DNA synthesome complex (17 subunits)	17	-0.362739	0.0228597	0.464724	5426	POLE	polymerase (DNA directed), epsilon	0.888585	0.0513011
1111	DNA synthesome complex (17 subunits)	17	-0.362739	0.0228597	0.464724	5427	POLE2	polymerase (DNA directed), epsilon 2 (p59 subunit)	0.0732928	-1.13494
1111	DNA synthesome complex (17 subunits)	17	-0.362739	0.0228597	0.464724	5557	PRIM1	primase, DNA, polypeptide 1 (49kDa)	0.90898	0.0414456
1111	DNA synthesome complex (17 subunits)	17	-0.362739	0.0228597	0.464724	5558	PRIM2	primase, DNA, polypeptide 2 (58kDa)	0.215576	0.666399
1111	DNA synthesome complex (17 subunits)	17	-0.362739	0.0228597	0.464724	5981	RFC1	replication factor C (activator 1) 1, 145kDa	0.0457917	-1.33921
1111	DNA synthesome complex (17 subunits)	17	-0.362739	0.0228597	0.464724	6117	RPA1	replication protein A1, 70kDa	0.508755	-0.293491
1111	DNA synthesome complex (17 subunits)	17	-0.362739	0.0228597	0.464724	7150	TOP1	topoisomerase (DNA) I	0.215392	-0.666771
1111	DNA synthesome complex (17 subunits)	17	-0.362739	0.0228597	0.464724	7155	TOP2B	topoisomerase (DNA) II beta 180kDa	0.390614	0.408252
1111	DNA synthesome complex (17 subunits)	17	-0.362739	0.0228597	0.464724	10714	POLD3	polymerase (DNA-directed), delta 3, accessory subunit	0.755365	-0.121843
1111	DNA synthesome complex (17 subunits)	17	-0.362739	0.0228597	0.464724	23649	POLA2	polymerase (DNA directed), alpha 2 (70kD subunit)	0.614774	-0.211284
1111	DNA synthesome complex (17 subunits)	17	-0.362739	0.0228597	0.464724	54107	POLE3	polymerase (DNA directed), epsilon 3 (p17 subunit)	0.465767	0.331831
1111	DNA synthesome complex (17 subunits)	17	-0.362739	0.0228597	0.464724	56655	POLE4	polymerase (DNA-directed), epsilon 4 (p12 subunit)	0.198422	-0.70241
1111	DNA synthesome complex (17 subunits)	17	-0.362739	0.0228597	0.464724	57804	POLD4	polymerase (DNA-directed), delta 4	0.0036236	-2.44086
926	SCRIB-LGL2 complex	2	-1.13213	0.0231727	0.465609	3993	LLGL2	lethal giant larvae homolog 2 (Drosophila)	0.686029	-0.163658
926	SCRIB-LGL2 complex	2	-1.13213	0.0231727	0.465609	23513	SCRIB	scribbled homolog (Drosophila)	0.00793243	-2.10059
144	Gamma-BAR-AP1 complex	9	0.600966	0.0240087	0.472247	162	AP1B1	adaptor-related protein complex 1, beta 1 subunit	0.145934	-0.835845
144	Gamma-BAR-AP1 complex	9	0.600966	0.0240087	0.472247	164	AP1G1	adaptor-related protein complex 1, gamma 1 subunit	0.176114	0.754207
144	Gamma-BAR-AP1 complex	9	0.600966	0.0240087	0.472247	1174	AP1S1	adaptor-related protein complex 1, sigma 1 subunit	0.000775749	3.11028
144	Gamma-BAR-AP1 complex	9	0.600966	0.0240087	0.472247	8905	AP1S2	adaptor-related protein complex 1, sigma 2 subunit	0.179405	0.746165
144	Gamma-BAR-AP1 complex	9	0.600966	0.0240087	0.472247	8906	AP1G2	adaptor-related protein complex 1, gamma 2 subunit	0.38213	-0.417788
144	Gamma-BAR-AP1 complex	9	0.600966	0.0240087	0.472247	8907	AP1M1	adaptor-related protein complex 1, mu 1 subunit	0.588045	-0.230589
144	Gamma-BAR-AP1 complex	9	0.600966	0.0240087	0.472247	10053	AP1M2	adaptor-related protein complex 1, mu 2 subunit	0.55528	-0.255488
144	Gamma-BAR-AP1 complex	9	0.600966	0.0240087	0.472247	55435	AP1AR	adaptor-related protein complex 1 associated regulatory protein	0.2795	0.553618
144	Gamma-BAR-AP1 complex	9	0.600966	0.0240087	0.472247	130340	AP1S3	adaptor-related protein complex 1, sigma 3 subunit	0.0103721	1.98413
2942	Ecsit complex (ECSIT, NDUFS3, NDUFAF1)	3	1.001	0.0251391	0.472247	4722	NDUFS3	NADH dehydrogenase (ubiquinone) Fe-S protein 3, 30kDa (NADH-coenzyme Q reductase)	0.713659	0.146509
2942	Ecsit complex (ECSIT, NDUFS3, NDUFAF1)	3	1.001	0.0251391	0.472247	51103	NDUFAF1	NADH dehydrogenase (ubiquinone) 1 alpha subcomplex, assembly factor 1	0.305129	0.515517
2942	Ecsit complex (ECSIT, NDUFS3, NDUFAF1)	3	1.001	0.0251391	0.472247	51295	ECSIT	ECSIT homolog (Drosophila)	0.00456049	2.34099
5380	TRBP containing complex (DICER, RPL7A, EIF6, MOV10 and subunits of the 60S ribosomal particle)	25	-0.281512	0.0253122	0.472247	3692	EIF6	eukaryotic translation initiation factor 6	0.303363	-0.518037
5380	TRBP containing complex (DICER, RPL7A, EIF6, MOV10 and subunits of the 60S ribosomal particle)	25	-0.281512	0.0253122	0.472247	4343	MOV10	Mov10, Moloney leukemia virus 10, homolog (mouse)	0.847824	0.0716944
5380	TRBP containing complex (DICER, RPL7A, EIF6, MOV10 and subunits of the 60S ribosomal particle)	25	-0.281512	0.0253122	0.472247	4736	RPL10A	ribosomal protein L10a	0.297089	-0.527113
5380	TRBP containing complex (DICER, RPL7A, EIF6, MOV10 and subunits of the 60S ribosomal particle)	25	-0.281512	0.0253122	0.472247	6129	RPL7	ribosomal protein L7	0.214475	-0.668624
5380	TRBP containing complex (DICER, RPL7A, EIF6, MOV10 and subunits of the 60S ribosomal particle)	25	-0.281512	0.0253122	0.472247	6130	RPL7A	ribosomal protein L7a	0.806912	-0.0931739
5380	TRBP containing complex (DICER, RPL7A, EIF6, MOV10 and subunits of the 60S ribosomal particle)	25	-0.281512	0.0253122	0.472247	6135	RPL11	ribosomal protein L11	0.758885	-0.119824
5380	TRBP containing complex (DICER, RPL7A, EIF6, MOV10 and subunits of the 60S ribosomal particle)	25	-0.281512	0.0253122	0.472247	6136	RPL12	ribosomal protein L12	0.0180741	-1.74294
5380	TRBP containing complex (DICER, RPL7A, EIF6, MOV10 and subunits of the 60S ribosomal particle)	25	-0.281512	0.0253122	0.472247	6137	RPL13	ribosomal protein L13	0.0866677	-1.06214
5380	TRBP containing complex (DICER, RPL7A, EIF6, MOV10 and subunits of the 60S ribosomal particle)	25	-0.281512	0.0253122	0.472247	6138	RPL15	ribosomal protein L15	0.261139	0.583129
5380	TRBP containing complex (DICER, RPL7A, EIF6, MOV10 and subunits of the 60S ribosomal particle)	25	-0.281512	0.0253122	0.472247	6142	RPL18A	ribosomal protein L18a	0.972571	0.0120788
5380	TRBP containing complex (DICER, RPL7A, EIF6, MOV10 and subunits of the 60S ribosomal particle)	25	-0.281512	0.0253122	0.472247	6143	RPL19	ribosomal protein L19	0.645659	0.189997
5380	TRBP containing complex (DICER, RPL7A, EIF6, MOV10 and subunits of the 60S ribosomal particle)	25	-0.281512	0.0253122	0.472247	6144	RPL21	ribosomal protein L21	0.112783	-0.947755
5380	TRBP containing complex (DICER, RPL7A, EIF6, MOV10 and subunits of the 60S ribosomal particle)	25	-0.281512	0.0253122	0.472247	6155	RPL27	ribosomal protein L27	0.015536	1.80866
5380	TRBP containing complex (DICER, RPL7A, EIF6, MOV10 and subunits of the 60S ribosomal particle)	25	-0.281512	0.0253122	0.472247	6156	RPL30	ribosomal protein L30	0.150191	-0.823356
5380	TRBP containing complex (DICER, RPL7A, EIF6, MOV10 and subunits of the 60S ribosomal particle)	25	-0.281512	0.0253122	0.472247	6158	RPL28	ribosomal protein L28	0.821872	-0.0851958
5380	TRBP containing complex (DICER, RPL7A, EIF6, MOV10 and subunits of the 60S ribosomal particle)	25	-0.281512	0.0253122	0.472247	6161	RPL32	ribosomal protein L32	0.0834998	-1.07831
5380	TRBP containing complex (DICER, RPL7A, EIF6, MOV10 and subunits of the 60S ribosomal particle)	25	-0.281512	0.0253122	0.472247	6164	RPL34	ribosomal protein L34	0.583442	0.234002
5380	TRBP containing complex (DICER, RPL7A, EIF6, MOV10 and subunits of the 60S ribosomal particle)	25	-0.281512	0.0253122	0.472247	6165	RPL35A	ribosomal protein L35a	0.869337	0.0608116
5380	TRBP containing complex (DICER, RPL7A, EIF6, MOV10 and subunits of the 60S ribosomal particle)	25	-0.281512	0.0253122	0.472247	6168	RPL37A	ribosomal protein L37a	0.729928	-0.13672
5380	TRBP containing complex (DICER, RPL7A, EIF6, MOV10 and subunits of the 60S ribosomal particle)	25	-0.281512	0.0253122	0.472247	6176	RPLP1	ribosomal protein, large, P1	0.0617348	-1.20947
5380	TRBP containing complex (DICER, RPL7A, EIF6, MOV10 and subunits of the 60S ribosomal particle)	25	-0.281512	0.0253122	0.472247	6181	RPLP2	ribosomal protein, large, P2	0.308373	0.510924
5380	TRBP containing complex (DICER, RPL7A, EIF6, MOV10 and subunits of the 60S ribosomal particle)	25	-0.281512	0.0253122	0.472247	9045	RPL14	ribosomal protein L14	0.669042	-0.174547
5380	TRBP containing complex (DICER, RPL7A, EIF6, MOV10 and subunits of the 60S ribosomal particle)	25	-0.281512	0.0253122	0.472247	23405	DICER1	dicer 1, ribonuclease type III	0.471779	-0.326262
5380	TRBP containing complex (DICER, RPL7A, EIF6, MOV10 and subunits of the 60S ribosomal particle)	25	-0.281512	0.0253122	0.472247	25873	RPL36	ribosomal protein L36	0.438164	-0.358364
5380	TRBP containing complex (DICER, RPL7A, EIF6, MOV10 and subunits of the 60S ribosomal particle)	25	-0.281512	0.0253122	0.472247	51187	RSL24D1	ribosomal L24 domain containing 1	0.230543	-0.637249
3206	SMAD4-SKI-NCOR complex	3	0.996237	0.0257153	0.472247	4089	SMAD4	SMAD family member 4	0.0818302	1.08709
3206	SMAD4-SKI-NCOR complex	3	0.996237	0.0257153	0.472247	6497	SKI	v-ski sarcoma viral oncogene homolog (avian)	0.00891692	2.04979
3206	SMAD4-SKI-NCOR complex	3	0.996237	0.0257153	0.472247	9611	NCOR1	nuclear receptor corepressor 1	0.710952	-0.14816
3979	mTORC2 complex (mTOR/FRAP1, LST8, mAVO3/RICTOR, SIN1)	4	-0.771838	0.0258641	0.472247	2475	MTOR	mechanistic target of rapamycin (serine/threonine kinase)	0.916124	-0.0380458
3979	mTORC2 complex (mTOR/FRAP1, LST8, mAVO3/RICTOR, SIN1)	4	-0.771838	0.0258641	0.472247	64223	MLST8	MTOR associated protein, LST8 homolog (S. cerevisiae)	0.00299399	-2.52375
3979	mTORC2 complex (mTOR/FRAP1, LST8, mAVO3/RICTOR, SIN1)	4	-0.771838	0.0258641	0.472247	79109	MAPKAP1	mitogen-activated protein kinase associated protein 1	0.546074	-0.262749
3979	mTORC2 complex (mTOR/FRAP1, LST8, mAVO3/RICTOR, SIN1)	4	-0.771838	0.0258641	0.472247	253260	RICTOR	RPTOR independent companion of MTOR, complex 2	0.546001	-0.262807
757	Prune-GSK3beta complex	2	1.19367	0.0259464	0.472247	2932	GSK3B	glycogen synthase kinase 3 beta	0.131903	0.879744
757	Prune-GSK3beta complex	2	1.19367	0.0259464	0.472247	58497	PRUNE	prune homolog (Drosophila)	0.0310744	1.5076
845	PCI-PSA-SCG2 complex	3	0.993881	0.0260041	0.472247	354	KLK3	kallikrein-related peptidase 3	0.811966	-0.0904621
845	PCI-PSA-SCG2 complex	3	0.993881	0.0260041	0.472247	5104	SERPINA5	serpin peptidase inhibitor, clade A (alpha-1 antiproteinase, antitrypsin), member 5	0.000925127	3.0338
845	PCI-PSA-SCG2 complex	3	0.993881	0.0260041	0.472247	7857	SCG2	secretogranin II	0.915574	0.0383065
5877	MAP2K1-BRAF-RAF1-YWHAE-KSR1 complex	5	0.778166	0.0260097	0.472247	673	BRAF	v-raf murine sarcoma viral oncogene homolog B1	0.430885	0.365639
5877	MAP2K1-BRAF-RAF1-YWHAE-KSR1 complex	5	0.778166	0.0260097	0.472247	5604	MAP2K1	mitogen-activated protein kinase kinase 1	0.0106762	1.97158
5877	MAP2K1-BRAF-RAF1-YWHAE-KSR1 complex	5	0.778166	0.0260097	0.472247	5894	RAF1	v-raf-1 murine leukemia viral oncogene homolog 1	0.213638	0.670321
5877	MAP2K1-BRAF-RAF1-YWHAE-KSR1 complex	5	0.778166	0.0260097	0.472247	7531	YWHAE	tyrosine 3-monooxygenase/tryptophan 5-monooxygenase activation protein, epsilon polypeptide	0.89646	-0.0474689
5877	MAP2K1-BRAF-RAF1-YWHAE-KSR1 complex	5	0.778166	0.0260097	0.472247	8844	KSR1	kinase suppressor of ras 1	0.117286	0.930755
3122	OCT1-OBF1-DNA complex	2	-1.10019	0.0263004	0.472247	5450	POU2AF1	POU class 2 associating factor 1	0.0192959	-1.71453
3122	OCT1-OBF1-DNA complex	2	-1.10019	0.0263004	0.472247	5451	POU2F1	POU class 2 homeobox 1	0.326705	-0.485844
3132	OCT1-OBF1-DNA complex	2	-1.10019	0.0263004	0.472247	5450	POU2AF1	POU class 2 associating factor 1	0.0192959	-1.71453
3132	OCT1-OBF1-DNA complex	2	-1.10019	0.0263004	0.472247	5451	POU2F1	POU class 2 homeobox 1	0.326705	-0.485844
1558	POLR1B-RRN3 complex	2	1.18405	0.0269437	0.472247	54700	RRN3	RRN3 RNA polymerase I transcription factor homolog (S. cerevisiae)	0.0230521	1.63729
1558	POLR1B-RRN3 complex	2	1.18405	0.0269437	0.472247	84172	POLR1B	polymerase (RNA) I polypeptide B, 128kDa	0.185861	0.730812
217	CRSP complex	8	-0.52091	0.0270581	0.472247	5469	MED1	mediator complex subunit 1	0.0914742	-1.0387
217	CRSP complex	8	-0.52091	0.0270581	0.472247	9282	MED14	mediator complex subunit 14	0.961751	0.0169375
217	CRSP complex	8	-0.52091	0.0270581	0.472247	9439	MED23	mediator complex subunit 23	0.3559	0.448672
217	CRSP complex	8	-0.52091	0.0270581	0.472247	9440	MED17	mediator complex subunit 17	0.430739	-0.365786
217	CRSP complex	8	-0.52091	0.0270581	0.472247	9441	MED26	mediator complex subunit 26	0.105132	-0.978266
217	CRSP complex	8	-0.52091	0.0270581	0.472247	9442	MED27	mediator complex subunit 27	0.0643513	-1.19144
217	CRSP complex	8	-0.52091	0.0270581	0.472247	9443	MED7	mediator complex subunit 7	0.144289	0.840767
217	CRSP complex	8	-0.52091	0.0270581	0.472247	9862	MED24	mediator complex subunit 24	0.0126048	-1.89946
218	CRSP complex	8	-0.52091	0.0270581	0.472247	5469	MED1	mediator complex subunit 1	0.0914742	-1.0387
218	CRSP complex	8	-0.52091	0.0270581	0.472247	9282	MED14	mediator complex subunit 14	0.961751	0.0169375
218	CRSP complex	8	-0.52091	0.0270581	0.472247	9439	MED23	mediator complex subunit 23	0.3559	0.448672
218	CRSP complex	8	-0.52091	0.0270581	0.472247	9440	MED17	mediator complex subunit 17	0.430739	-0.365786
218	CRSP complex	8	-0.52091	0.0270581	0.472247	9441	MED26	mediator complex subunit 26	0.105132	-0.978266
218	CRSP complex	8	-0.52091	0.0270581	0.472247	9442	MED27	mediator complex subunit 27	0.0643513	-1.19144
218	CRSP complex	8	-0.52091	0.0270581	0.472247	9443	MED7	mediator complex subunit 7	0.144289	0.840767
218	CRSP complex	8	-0.52091	0.0270581	0.472247	9862	MED24	mediator complex subunit 24	0.0126048	-1.89946
550	NOS3-CAV1-NOSTRIN complex	3	-0.900906	0.0274437	0.472247	857	CAV1	caveolin 1, caveolae protein, 22kDa	0.144766	-0.839333
550	NOS3-CAV1-NOSTRIN complex	3	-0.900906	0.0274437	0.472247	4846	NOS3	nitric oxide synthase 3 (endothelial cell)	0.0268482	-1.57109
550	NOS3-CAV1-NOSTRIN complex	3	-0.900906	0.0274437	0.472247	115677	NOSTRIN	nitric oxide synthase trafficker	0.510152	-0.2923
3678	RIN1-STAM2-EGFR complex, EGF stimulated	3	-0.897579	0.0278751	0.472247	1956	EGFR	epidermal growth factor receptor	0.033564	-1.47413
3678	RIN1-STAM2-EGFR complex, EGF stimulated	3	-0.897579	0.0278751	0.472247	9610	RIN1	Ras and Rab interactor 1	0.0464595	-1.33293
3678	RIN1-STAM2-EGFR complex, EGF stimulated	3	-0.897579	0.0278751	0.472247	10254	STAM2	signal transducing adaptor molecule (SH3 domain and ITAM motif) 2	0.768576	0.114313
2395	ITGA7-ITGB1-CD151 complex	3	-0.897566	0.0278769	0.472247	977	CD151	CD151 molecule (Raph blood group)	0.0940795	-1.0265
2395	ITGA7-ITGB1-CD151 complex	3	-0.897566	0.0278769	0.472247	3679	ITGA7	integrin, alpha 7	0.0331751	-1.47919
2395	ITGA7-ITGB1-CD151 complex	3	-0.897566	0.0278769	0.472247	3688	ITGB1	integrin, beta 1 (fibronectin receptor, beta polypeptide, antigen CD29 includes MDF2, MSK12)	0.650123	-0.187004
36	AP1 adaptor complex	8	0.606884	0.0285879	0.472247	162	AP1B1	adaptor-related protein complex 1, beta 1 subunit	0.145934	-0.835845
36	AP1 adaptor complex	8	0.606884	0.0285879	0.472247	164	AP1G1	adaptor-related protein complex 1, gamma 1 subunit	0.176114	0.754207
36	AP1 adaptor complex	8	0.606884	0.0285879	0.472247	1174	AP1S1	adaptor-related protein complex 1, sigma 1 subunit	0.000775749	3.11028
36	AP1 adaptor complex	8	0.606884	0.0285879	0.472247	8905	AP1S2	adaptor-related protein complex 1, sigma 2 subunit	0.179405	0.746165
36	AP1 adaptor complex	8	0.606884	0.0285879	0.472247	8906	AP1G2	adaptor-related protein complex 1, gamma 2 subunit	0.38213	-0.417788
36	AP1 adaptor complex	8	0.606884	0.0285879	0.472247	8907	AP1M1	adaptor-related protein complex 1, mu 1 subunit	0.588045	-0.230589
36	AP1 adaptor complex	8	0.606884	0.0285879	0.472247	10053	AP1M2	adaptor-related protein complex 1, mu 2 subunit	0.55528	-0.255488
36	AP1 adaptor complex	8	0.606884	0.0285879	0.472247	130340	AP1S3	adaptor-related protein complex 1, sigma 3 subunit	0.0103721	1.98413
2721	HCF-1 complex	18	-0.335981	0.0288476	0.472247	3054	HCFC1	host cell factor C1 (VP16-accessory protein)	0.909952	0.0409816
2721	HCF-1 complex	18	-0.335981	0.0288476	0.472247	3065	HDAC1	histone deacetylase 1	0.729001	-0.137272
2721	HCF-1 complex	18	-0.335981	0.0288476	0.472247	3066	HDAC2	histone deacetylase 2	0.510678	-0.291853
2721	HCF-1 complex	18	-0.335981	0.0288476	0.472247	3308	HSPA4	heat shock 70kDa protein 4	0.196702	0.706191
2721	HCF-1 complex	18	-0.335981	0.0288476	0.472247	3309	HSPA5	heat shock 70kDa protein 5 (glucose-regulated protein, 78kDa)	0.858393	0.066314
2721	HCF-1 complex	18	-0.335981	0.0288476	0.472247	3312	HSPA8	heat shock 70kDa protein 8	0.0788937	-1.10296
2721	HCF-1 complex	18	-0.335981	0.0288476	0.472247	3326	HSP90AB1	heat shock protein 90kDa alpha (cytosolic), class B member 1	0.0347186	-1.45944
2721	HCF-1 complex	18	-0.335981	0.0288476	0.472247	5928	RBBP4	retinoblastoma binding protein 4	0.213744	-0.670107
2721	HCF-1 complex	18	-0.335981	0.0288476	0.472247	5931	RBBP7	retinoblastoma binding protein 7	0.455238	-0.341761
2721	HCF-1 complex	18	-0.335981	0.0288476	0.472247	6667	SP1	Sp1 transcription factor	0.3492	-0.456925
2721	HCF-1 complex	18	-0.335981	0.0288476	0.472247	8473	OGT	O-linked N-acetylglucosamine (GlcNAc) transferase (UDP-N-acetylglucosamine:polypeptide-N-acetylglucosaminyl transferase)	0.661672	-0.179357
2721	HCF-1 complex	18	-0.335981	0.0288476	0.472247	8819	SAP30	Sin3A-associated protein, 30kDa	0.754271	-0.122472
2721	HCF-1 complex	18	-0.335981	0.0288476	0.472247	9070	ASH2L	ash2 (absent, small, or homeotic)-like (Drosophila)	0.419159	-0.377621
2721	HCF-1 complex	18	-0.335981	0.0288476	0.472247	9739	SETD1A	SET domain containing 1A	0.19601	-0.707723
2721	HCF-1 complex	18	-0.335981	0.0288476	0.472247	11091	WDR5	WD repeat domain 5	0.0233649	-1.63144
2721	HCF-1 complex	18	-0.335981	0.0288476	0.472247	23309	SIN3B	SIN3 homolog B, transcription regulator (yeast)	0.197691	0.704014
2721	HCF-1 complex	18	-0.335981	0.0288476	0.472247	25942	SIN3A	SIN3 homolog A, transcription regulator (yeast)	0.723352	-0.14065
2721	HCF-1 complex	18	-0.335981	0.0288476	0.472247	64426	SUDS3	suppressor of defective silencing 3 homolog (S. cerevisiae)	0.882234	0.0544162
2266	PPP3CA-PPP3CA-RCAN1 complex	3	0.970313	0.0290449	0.472247	1827	RCAN1	regulator of calcineurin 1	0.99106	0.00390009
2266	PPP3CA-PPP3CA-RCAN1 complex	3	0.970313	0.0290449	0.472247	5530	PPP3CA	protein phosphatase 3, catalytic subunit, alpha isozyme	0.00564917	2.24802
2266	PPP3CA-PPP3CA-RCAN1 complex	3	0.970313	0.0290449	0.472247	5532	PPP3CB	protein phosphatase 3, catalytic subunit, beta isozyme	0.219268	0.659024
1734	SF3A1-SF3A2-SF3A3 complex	3	-0.884677	0.0296017	0.472247	8175	SF3A2	splicing factor 3a, subunit 2, 66kDa	0.149334	-0.82584
1734	SF3A1-SF3A2-SF3A3 complex	3	-0.884677	0.0296017	0.472247	10291	SF3A1	splicing factor 3a, subunit 1, 120kDa	0.678002	-0.168769
1734	SF3A1-SF3A2-SF3A3 complex	3	-0.884677	0.0296017	0.472247	10946	SF3A3	splicing factor 3a, subunit 3, 60kDa	0.0219067	-1.65942
2858	HBO1 complex	7	-0.542209	0.0300729	0.472247	9767	PHF16	PHD finger protein 16	0.72164	-0.141679
2858	HBO1 complex	7	-0.542209	0.0300729	0.472247	11143	MYST2	MYST histone acetyltransferase 2	0.34105	-0.467182
2858	HBO1 complex	7	-0.542209	0.0300729	0.472247	23338	PHF15	PHD finger protein 15	0.147276	-0.831867
2858	HBO1 complex	7	-0.542209	0.0300729	0.472247	51147	ING4	inhibitor of growth family, member 4	0.662075	0.179093
2858	HBO1 complex	7	-0.542209	0.0300729	0.472247	64769	MEAF6	MYST/Esa1-associated factor 6	0.433303	-0.363209
2858	HBO1 complex	7	-0.542209	0.0300729	0.472247	79960	PHF17	PHD finger protein 17	0.0234133	-1.63054
2858	HBO1 complex	7	-0.542209	0.0300729	0.472247	84289	ING5	inhibitor of growth family, member 5	0.288347	-0.540085
441	TFTC-type histone acetyl transferase complex	11	-0.430592	0.0303534	0.472247	2099	ESR1	estrogen receptor 1	0.777849	0.109105
441	TFTC-type histone acetyl transferase complex	11	-0.430592	0.0303534	0.472247	2648	KAT2A	K(lysine) acetyltransferase 2A	0.75761	-0.120554
441	TFTC-type histone acetyl transferase complex	11	-0.430592	0.0303534	0.472247	5469	MED1	mediator complex subunit 1	0.0914742	-1.0387
441	TFTC-type histone acetyl transferase complex	11	-0.430592	0.0303534	0.472247	8295	TRRAP	transformation/transcription domain-associated protein	0.98445	-0.00680626
441	TFTC-type histone acetyl transferase complex	11	-0.430592	0.0303534	0.472247	9282	MED14	mediator complex subunit 14	0.961751	0.0169375
441	TFTC-type histone acetyl transferase complex	11	-0.430592	0.0303534	0.472247	9439	MED23	mediator complex subunit 23	0.3559	0.448672
441	TFTC-type histone acetyl transferase complex	11	-0.430592	0.0303534	0.472247	9440	MED17	mediator complex subunit 17	0.430739	-0.365786
441	TFTC-type histone acetyl transferase complex	11	-0.430592	0.0303534	0.472247	9862	MED24	mediator complex subunit 24	0.0126048	-1.89946
441	TFTC-type histone acetyl transferase complex	11	-0.430592	0.0303534	0.472247	9968	MED12	mediator complex subunit 12	0.0388398	-1.41072
441	TFTC-type histone acetyl transferase complex	11	-0.430592	0.0303534	0.472247	9969	MED13	mediator complex subunit 13	0.939773	0.0269768
441	TFTC-type histone acetyl transferase complex	11	-0.430592	0.0303534	0.472247	10025	MED16	mediator complex subunit 16	0.319031	-0.496168
635	AGPS-GNPAT complex	2	1.15289	0.0303966	0.472247	8443	GNPAT	glyceronephosphate O-acyltransferase	0.20587	0.686407
635	AGPS-GNPAT complex	2	1.15289	0.0303966	0.472247	8540	AGPS	alkylglycerone phosphate synthase	0.0240234	1.61937
1200	Oligosaccharyltransferase complex (Stt3B variant)	7	0.635316	0.0309079	0.472247	1603	DAD1	defender against cell death 1	0.152342	0.817181
1200	Oligosaccharyltransferase complex (Stt3B variant)	7	0.635316	0.0309079	0.472247	1650	DDOST	dolichyl-diphosphooligosaccharide--protein glycosyltransferase	0.632162	-0.199171
1200	Oligosaccharyltransferase complex (Stt3B variant)	7	0.635316	0.0309079	0.472247	6184	RPN1	ribophorin I	0.604711	0.218452
1200	Oligosaccharyltransferase complex (Stt3B variant)	7	0.635316	0.0309079	0.472247	6185	RPN2	ribophorin II	0.567385	-0.246122
1200	Oligosaccharyltransferase complex (Stt3B variant)	7	0.635316	0.0309079	0.472247	7991	TUSC3	tumor suppressor candidate 3	0.553214	0.257107
1200	Oligosaccharyltransferase complex (Stt3B variant)	7	0.635316	0.0309079	0.472247	84061	MAGT1	magnesium transporter 1	0.0505319	1.29643
1200	Oligosaccharyltransferase complex (Stt3B variant)	7	0.635316	0.0309079	0.472247	201595	STT3B	STT3, subunit of the oligosaccharyltransferase complex, homolog B (S. cerevisiae)	0.00497359	2.30333
3055	Nop56p-associated pre-rRNA complex	104	-0.108604	0.0309349	0.472247	59	ACTA2	actin, alpha 2, smooth muscle, aorta	0.788894	-0.102981
3055	Nop56p-associated pre-rRNA complex	104	-0.108604	0.0309349	0.472247	72	ACTG2	actin, gamma 2, smooth muscle, enteric	0.633047	0.198564
3055	Nop56p-associated pre-rRNA complex	104	-0.108604	0.0309349	0.472247	292	SLC25A5	solute carrier family 25 (mitochondrial carrier; adenine nucleotide translocator), member 5	0.186156	0.730123
3055	Nop56p-associated pre-rRNA complex	104	-0.108604	0.0309349	0.472247	1660	DHX9	DEAH (Asp-Glu-Ala-His) box polypeptide 9	0.00224174	2.64941
3055	Nop56p-associated pre-rRNA complex	104	-0.108604	0.0309349	0.472247	1915	EEF1A1	eukaryotic translation elongation factor 1 alpha 1	0.00701219	2.15415
3055	Nop56p-associated pre-rRNA complex	104	-0.108604	0.0309349	0.472247	1938	EEF2	eukaryotic translation elongation factor 2	0.539472	0.268031
3055	Nop56p-associated pre-rRNA complex	104	-0.108604	0.0309349	0.472247	2091	FBL	fibrillarin	0.426355	-0.370229
3055	Nop56p-associated pre-rRNA complex	104	-0.108604	0.0309349	0.472247	3007	HIST1H1D	histone cluster 1, H1d	0.181371	-0.741431
3055	Nop56p-associated pre-rRNA complex	104	-0.108604	0.0309349	0.472247	3178	HNRNPA1	heterogeneous nuclear ribonucleoprotein A1	0.97096	0.0127986
3055	Nop56p-associated pre-rRNA complex	104	-0.108604	0.0309349	0.472247	3192	HNRNPU	heterogeneous nuclear ribonucleoprotein U (scaffold attachment factor A)	0.374339	0.426735
3055	Nop56p-associated pre-rRNA complex	104	-0.108604	0.0309349	0.472247	3608	ILF2	interleukin enhancer binding factor 2, 45kDa	0.432841	-0.363671
3055	Nop56p-associated pre-rRNA complex	104	-0.108604	0.0309349	0.472247	3609	ILF3	interleukin enhancer binding factor 3, 90kDa	0.6405	-0.193481
3055	Nop56p-associated pre-rRNA complex	104	-0.108604	0.0309349	0.472247	4670	HNRNPM	heterogeneous nuclear ribonucleoprotein M	0.851749	0.0696882
3055	Nop56p-associated pre-rRNA complex	104	-0.108604	0.0309349	0.472247	4673	NAP1L1	nucleosome assembly protein 1-like 1	0.309127	-0.509864
3055	Nop56p-associated pre-rRNA complex	104	-0.108604	0.0309349	0.472247	4691	NCL	nucleolin	0.21109	0.675532
3055	Nop56p-associated pre-rRNA complex	104	-0.108604	0.0309349	0.472247	4736	RPL10A	ribosomal protein L10a	0.297089	-0.527113
3055	Nop56p-associated pre-rRNA complex	104	-0.108604	0.0309349	0.472247	4809	NHP2L1	NHP2 non-histone chromosome protein 2-like 1 (S. cerevisiae)	0.66048	0.18014
3055	Nop56p-associated pre-rRNA complex	104	-0.108604	0.0309349	0.472247	4869	NPM1	nucleophosmin (nucleolar phosphoprotein B23, numatrin)	0.899865	-0.0458226
3055	Nop56p-associated pre-rRNA complex	104	-0.108604	0.0309349	0.472247	4904	YBX1	Y box binding protein 1	0.930787	0.0311499
3055	Nop56p-associated pre-rRNA complex	104	-0.108604	0.0309349	0.472247	6122	RPL3	ribosomal protein L3	0.599738	0.222039
3055	Nop56p-associated pre-rRNA complex	104	-0.108604	0.0309349	0.472247	6124	RPL4	ribosomal protein L4	0.135802	-0.867093
3055	Nop56p-associated pre-rRNA complex	104	-0.108604	0.0309349	0.472247	6125	RPL5	ribosomal protein L5	0.757531	0.1206
3055	Nop56p-associated pre-rRNA complex	104	-0.108604	0.0309349	0.472247	6128	RPL6	ribosomal protein L6	0.0266673	-1.57402
3055	Nop56p-associated pre-rRNA complex	104	-0.108604	0.0309349	0.472247	6129	RPL7	ribosomal protein L7	0.214475	-0.668624
3055	Nop56p-associated pre-rRNA complex	104	-0.108604	0.0309349	0.472247	6130	RPL7A	ribosomal protein L7a	0.806912	-0.0931739
3055	Nop56p-associated pre-rRNA complex	104	-0.108604	0.0309349	0.472247	6132	RPL8	ribosomal protein L8	0.529147	-0.276423
3055	Nop56p-associated pre-rRNA complex	104	-0.108604	0.0309349	0.472247	6133	RPL9	ribosomal protein L9	0.191153	0.718619
3055	Nop56p-associated pre-rRNA complex	104	-0.108604	0.0309349	0.472247	6134	RPL10	ribosomal protein L10	0.663641	-0.178067
3055	Nop56p-associated pre-rRNA complex	104	-0.108604	0.0309349	0.472247	6135	RPL11	ribosomal protein L11	0.758885	-0.119824
3055	Nop56p-associated pre-rRNA complex	104	-0.108604	0.0309349	0.472247	6136	RPL12	ribosomal protein L12	0.0180741	-1.74294
3055	Nop56p-associated pre-rRNA complex	104	-0.108604	0.0309349	0.472247	6137	RPL13	ribosomal protein L13	0.0866677	-1.06214
3055	Nop56p-associated pre-rRNA complex	104	-0.108604	0.0309349	0.472247	6138	RPL15	ribosomal protein L15	0.261139	0.583129
3055	Nop56p-associated pre-rRNA complex	104	-0.108604	0.0309349	0.472247	6139	RPL17	ribosomal protein L17	0.698613	-0.155763
3055	Nop56p-associated pre-rRNA complex	104	-0.108604	0.0309349	0.472247	6141	RPL18	ribosomal protein L18	0.175028	-0.756893
3055	Nop56p-associated pre-rRNA complex	104	-0.108604	0.0309349	0.472247	6142	RPL18A	ribosomal protein L18a	0.972571	0.0120788
3055	Nop56p-associated pre-rRNA complex	104	-0.108604	0.0309349	0.472247	6143	RPL19	ribosomal protein L19	0.645659	0.189997
3055	Nop56p-associated pre-rRNA complex	104	-0.108604	0.0309349	0.472247	6144	RPL21	ribosomal protein L21	0.112783	-0.947755
3055	Nop56p-associated pre-rRNA complex	104	-0.108604	0.0309349	0.472247	6146	RPL22	ribosomal protein L22	0.924185	0.0342412
3055	Nop56p-associated pre-rRNA complex	104	-0.108604	0.0309349	0.472247	6147	RPL23A	ribosomal protein L23a	0.225483	0.646886
3055	Nop56p-associated pre-rRNA complex	104	-0.108604	0.0309349	0.472247	6152	RPL24	ribosomal protein L24	0.87833	-0.0563422
3055	Nop56p-associated pre-rRNA complex	104	-0.108604	0.0309349	0.472247	6154	RPL26	ribosomal protein L26	0.565059	-0.247906
3055	Nop56p-associated pre-rRNA complex	104	-0.108604	0.0309349	0.472247	6155	RPL27	ribosomal protein L27	0.015536	1.80866
3055	Nop56p-associated pre-rRNA complex	104	-0.108604	0.0309349	0.472247	6156	RPL30	ribosomal protein L30	0.150191	-0.823356
3055	Nop56p-associated pre-rRNA complex	104	-0.108604	0.0309349	0.472247	6157	RPL27A	ribosomal protein L27a	0.260113	-0.584838
3055	Nop56p-associated pre-rRNA complex	104	-0.108604	0.0309349	0.472247	6158	RPL28	ribosomal protein L28	0.821872	-0.0851958
3055	Nop56p-associated pre-rRNA complex	104	-0.108604	0.0309349	0.472247	6159	RPL29	ribosomal protein L29	0.670181	0.173808
3055	Nop56p-associated pre-rRNA complex	104	-0.108604	0.0309349	0.472247	6160	RPL31	ribosomal protein L31	0.571801	0.242755
3055	Nop56p-associated pre-rRNA complex	104	-0.108604	0.0309349	0.472247	6161	RPL32	ribosomal protein L32	0.0834998	-1.07831
3055	Nop56p-associated pre-rRNA complex	104	-0.108604	0.0309349	0.472247	6165	RPL35A	ribosomal protein L35a	0.869337	0.0608116
3055	Nop56p-associated pre-rRNA complex	104	-0.108604	0.0309349	0.472247	6168	RPL37A	ribosomal protein L37a	0.729928	-0.13672
3055	Nop56p-associated pre-rRNA complex	104	-0.108604	0.0309349	0.472247	6170	RPL39	ribosomal protein L39	0.450999	-0.345824
3055	Nop56p-associated pre-rRNA complex	104	-0.108604	0.0309349	0.472247	6173	RPL36A	ribosomal protein L36a	0.807104	-0.0930706
3055	Nop56p-associated pre-rRNA complex	104	-0.108604	0.0309349	0.472247	6175	RPLP0	ribosomal protein, large, P0	0.45605	-0.340987
3055	Nop56p-associated pre-rRNA complex	104	-0.108604	0.0309349	0.472247	6176	RPLP1	ribosomal protein, large, P1	0.0617348	-1.20947
3055	Nop56p-associated pre-rRNA complex	104	-0.108604	0.0309349	0.472247	6181	RPLP2	ribosomal protein, large, P2	0.308373	0.510924
3055	Nop56p-associated pre-rRNA complex	104	-0.108604	0.0309349	0.472247	6187	RPS2	ribosomal protein S2	0.576643	0.239093
3055	Nop56p-associated pre-rRNA complex	104	-0.108604	0.0309349	0.472247	6189	RPS3A	ribosomal protein S3A	0.129888	0.886431
3055	Nop56p-associated pre-rRNA complex	104	-0.108604	0.0309349	0.472247	6194	RPS6	ribosomal protein S6	0.600072	0.221796
3055	Nop56p-associated pre-rRNA complex	104	-0.108604	0.0309349	0.472247	6201	RPS7	ribosomal protein S7	0.338407	-0.470561
3055	Nop56p-associated pre-rRNA complex	104	-0.108604	0.0309349	0.472247	6202	RPS8	ribosomal protein S8	0.50548	-0.296296
3055	Nop56p-associated pre-rRNA complex	104	-0.108604	0.0309349	0.472247	6203	RPS9	ribosomal protein S9	0.875308	-0.0578393
3055	Nop56p-associated pre-rRNA complex	104	-0.108604	0.0309349	0.472247	6205	RPS11	ribosomal protein S11	0.818289	-0.0870934
3055	Nop56p-associated pre-rRNA complex	104	-0.108604	0.0309349	0.472247	6206	RPS12	ribosomal protein S12	0.716412	-0.144837
3055	Nop56p-associated pre-rRNA complex	104	-0.108604	0.0309349	0.472247	6207	RPS13	ribosomal protein S13	0.0422796	-1.37387
3055	Nop56p-associated pre-rRNA complex	104	-0.108604	0.0309349	0.472247	6208	RPS14	ribosomal protein S14	0.190663	-0.719733
3055	Nop56p-associated pre-rRNA complex	104	-0.108604	0.0309349	0.472247	6209	RPS15	ribosomal protein S15	0.43139	-0.36513
3055	Nop56p-associated pre-rRNA complex	104	-0.108604	0.0309349	0.472247	6210	RPS15A	ribosomal protein S15a	0.0658536	-1.18142
3055	Nop56p-associated pre-rRNA complex	104	-0.108604	0.0309349	0.472247	6217	RPS16	ribosomal protein S16	0.134363	-0.871721
3055	Nop56p-associated pre-rRNA complex	104	-0.108604	0.0309349	0.472247	6218	RPS17	ribosomal protein S17	0.854873	0.0680984
3055	Nop56p-associated pre-rRNA complex	104	-0.108604	0.0309349	0.472247	6222	RPS18	ribosomal protein S18	0.408952	-0.388327
3055	Nop56p-associated pre-rRNA complex	104	-0.108604	0.0309349	0.472247	6228	RPS23	ribosomal protein S23	0.794326	-0.100001
3055	Nop56p-associated pre-rRNA complex	104	-0.108604	0.0309349	0.472247	6229	RPS24	ribosomal protein S24	0.170116	0.769254
3055	Nop56p-associated pre-rRNA complex	104	-0.108604	0.0309349	0.472247	6235	RPS29	ribosomal protein S29	0.693813	0.158758
3055	Nop56p-associated pre-rRNA complex	104	-0.108604	0.0309349	0.472247	6727	SRP14	signal recognition particle 14kDa (homologous Alu RNA binding protein)	0.70043	0.154635
3055	Nop56p-associated pre-rRNA complex	104	-0.108604	0.0309349	0.472247	6732	SRPK1	SRSF protein kinase 1	0.424707	0.371911
3055	Nop56p-associated pre-rRNA complex	104	-0.108604	0.0309349	0.472247	6949	TCOF1	Treacher Collins-Franceschetti syndrome 1	0.405916	-0.391563
3055	Nop56p-associated pre-rRNA complex	104	-0.108604	0.0309349	0.472247	7150	TOP1	topoisomerase (DNA) I	0.215392	-0.666771
3055	Nop56p-associated pre-rRNA complex	104	-0.108604	0.0309349	0.472247	7284	TUFM	Tu translation elongation factor, mitochondrial	0.503291	0.298181
3055	Nop56p-associated pre-rRNA complex	104	-0.108604	0.0309349	0.472247	7307	U2AF1	U2 small nuclear RNA auxiliary factor 1	0.716902	0.14454
3055	Nop56p-associated pre-rRNA complex	104	-0.108604	0.0309349	0.472247	7846	TUBA1A	tubulin, alpha 1a	0.266808	0.573802
3055	Nop56p-associated pre-rRNA complex	104	-0.108604	0.0309349	0.472247	8342	HIST1H2BM	histone cluster 1, H2bm	0.216076	-0.665394
3055	Nop56p-associated pre-rRNA complex	104	-0.108604	0.0309349	0.472247	8971	H1FX	H1 histone family, member X	0.892676	0.0493063
3055	Nop56p-associated pre-rRNA complex	104	-0.108604	0.0309349	0.472247	9045	RPL14	ribosomal protein L14	0.669042	-0.174547
3055	Nop56p-associated pre-rRNA complex	104	-0.108604	0.0309349	0.472247	9188	DDX21	DEAD (Asp-Glu-Ala-Asp) box polypeptide 21	0.728177	0.137763
3055	Nop56p-associated pre-rRNA complex	104	-0.108604	0.0309349	0.472247	9221	NOLC1	nucleolar and coiled-body phosphoprotein 1	0.113574	0.944721
3055	Nop56p-associated pre-rRNA complex	104	-0.108604	0.0309349	0.472247	9349	RPL23	ribosomal protein L23	0.312513	-0.505132
3055	Nop56p-associated pre-rRNA complex	104	-0.108604	0.0309349	0.472247	10514	MYBBP1A	MYB binding protein (P160) 1a	0.936976	-0.0282716
3055	Nop56p-associated pre-rRNA complex	104	-0.108604	0.0309349	0.472247	10528	NOP56	NOP56 ribonucleoprotein homolog (yeast)	0.847137	-0.0720465
3055	Nop56p-associated pre-rRNA complex	104	-0.108604	0.0309349	0.472247	10642	IGF2BP1	insulin-like growth factor 2 mRNA binding protein 1	0.864587	-0.0631911
3055	Nop56p-associated pre-rRNA complex	104	-0.108604	0.0309349	0.472247	10969	EBNA1BP2	EBNA1 binding protein 2	0.571145	-0.243254
3055	Nop56p-associated pre-rRNA complex	104	-0.108604	0.0309349	0.472247	11137	PWP1	PWP1 homolog (S. cerevisiae)	0.84536	0.0729585
3055	Nop56p-associated pre-rRNA complex	104	-0.108604	0.0309349	0.472247	11224	RPL35	ribosomal protein L35	0.186923	-0.728337
3055	Nop56p-associated pre-rRNA complex	104	-0.108604	0.0309349	0.472247	11338	U2AF2	U2 small nuclear RNA auxiliary factor 2	0.224175	-0.649412
3055	Nop56p-associated pre-rRNA complex	104	-0.108604	0.0309349	0.472247	23521	RPL13A	ribosomal protein L13a	0.20206	-0.69452
3055	Nop56p-associated pre-rRNA complex	104	-0.108604	0.0309349	0.472247	25873	RPL36	ribosomal protein L36	0.438164	-0.358364
3055	Nop56p-associated pre-rRNA complex	104	-0.108604	0.0309349	0.472247	26156	RSL1D1	ribosomal L1 domain containing 1	0.616327	0.210189
3055	Nop56p-associated pre-rRNA complex	104	-0.108604	0.0309349	0.472247	26354	GNL3	guanine nucleotide binding protein-like 3 (nucleolar)	0.383792	-0.415904
3055	Nop56p-associated pre-rRNA complex	104	-0.108604	0.0309349	0.472247	51602	NOP58	NOP58 ribonucleoprotein homolog (yeast)	0.521682	0.282594
3055	Nop56p-associated pre-rRNA complex	104	-0.108604	0.0309349	0.472247	51631	LUC7L2	LUC7-like 2 (S. cerevisiae)	0.0026445	-2.57766
3055	Nop56p-associated pre-rRNA complex	104	-0.108604	0.0309349	0.472247	55131	RBM28	RNA binding motif protein 28	0.766328	0.115585
3055	Nop56p-associated pre-rRNA complex	104	-0.108604	0.0309349	0.472247	55299	BRIX1	BRX1, biogenesis of ribosomes, homolog (S. cerevisiae)	0.00814854	2.08892
3055	Nop56p-associated pre-rRNA complex	104	-0.108604	0.0309349	0.472247	55646	LYAR	Ly1 antibody reactive homolog (mouse)	0.235014	-0.628905
3055	Nop56p-associated pre-rRNA complex	104	-0.108604	0.0309349	0.472247	55681	SCYL2	SCY1-like 2 (S. cerevisiae)	0.793469	0.10047
3055	Nop56p-associated pre-rRNA complex	104	-0.108604	0.0309349	0.472247	81027	TUBB1	tubulin, beta 1	0.20643	-0.685228
2489	NCR3-CD247 complex	2	-1.05726	0.0310537	0.472247	919	CD247	CD247 molecule	0.0895913	-1.04773
2489	NCR3-CD247 complex	2	-1.05726	0.0310537	0.472247	259197	NCR3	natural cytotoxicity triggering receptor 3	0.0857463	-1.06678
5241	SMC1-SMC3 complex	2	1.14675	0.0311181	0.472247	8243	SMC1A	structural maintenance of chromosomes 1A	0.367479	0.434767
5241	SMC1-SMC3 complex	2	1.14675	0.0311181	0.472247	9126	SMC3	structural maintenance of chromosomes 3	0.0138443	1.85873
232	ARC complex	15	-0.353942	0.0311552	0.472247	5469	MED1	mediator complex subunit 1	0.0914742	-1.0387
232	ARC complex	15	-0.353942	0.0311552	0.472247	9282	MED14	mediator complex subunit 14	0.961751	0.0169375
232	ARC complex	15	-0.353942	0.0311552	0.472247	9439	MED23	mediator complex subunit 23	0.3559	0.448672
232	ARC complex	15	-0.353942	0.0311552	0.472247	9440	MED17	mediator complex subunit 17	0.430739	-0.365786
232	ARC complex	15	-0.353942	0.0311552	0.472247	9441	MED26	mediator complex subunit 26	0.105132	-0.978266
232	ARC complex	15	-0.353942	0.0311552	0.472247	9443	MED7	mediator complex subunit 7	0.144289	0.840767
232	ARC complex	15	-0.353942	0.0311552	0.472247	9862	MED24	mediator complex subunit 24	0.0126048	-1.89946
232	ARC complex	15	-0.353942	0.0311552	0.472247	9968	MED12	mediator complex subunit 12	0.0388398	-1.41072
232	ARC complex	15	-0.353942	0.0311552	0.472247	9969	MED13	mediator complex subunit 13	0.939773	0.0269768
232	ARC complex	15	-0.353942	0.0311552	0.472247	10001	MED6	mediator complex subunit 6	0.104669	-0.980181
232	ARC complex	15	-0.353942	0.0311552	0.472247	27034	ACAD8	acyl-CoA dehydrogenase family, member 8	0.375024	-0.42594
232	ARC complex	15	-0.353942	0.0311552	0.472247	29079	MED4	mediator complex subunit 4	0.257685	0.588912
232	ARC complex	15	-0.353942	0.0311552	0.472247	51586	MED15	mediator complex subunit 15	0.898729	-0.0463713
232	ARC complex	15	-0.353942	0.0311552	0.472247	81857	MED25	mediator complex subunit 25	0.473261	0.3249
232	ARC complex	15	-0.353942	0.0311552	0.472247	112950	MED8	mediator complex subunit 8	0.388268	-0.410868
1554	RANBP1-RAN-KPNB1 complex	3	-0.870374	0.0316186	0.475103	3837	KPNB1	karyopherin (importin) beta 1	0.00626326	-2.2032
1554	RANBP1-RAN-KPNB1 complex	3	-0.870374	0.0316186	0.475103	5901	RAN	RAN, member RAS oncogene family	0.206186	-0.685741
1554	RANBP1-RAN-KPNB1 complex	3	-0.870374	0.0316186	0.475103	5902	RANBP1	RAN binding protein 1	0.527449	0.27782
2086	NFKB1-NFKB2-RELA-RELB complex	4	-0.730229	0.0324444	0.479565	4790	NFKB1	nuclear factor of kappa light polypeptide gene enhancer in B-cells 1	0.632905	-0.198661
2086	NFKB1-NFKB2-RELA-RELB complex	4	-0.730229	0.0324444	0.479565	4791	NFKB2	nuclear factor of kappa light polypeptide gene enhancer in B-cells 2 (p49/p100)	0.0254954	-1.59354
2086	NFKB1-NFKB2-RELA-RELB complex	4	-0.730229	0.0324444	0.479565	5970	RELA	v-rel reticuloendotheliosis viral oncogene homolog A (avian)	0.613346	-0.212295
2086	NFKB1-NFKB2-RELA-RELB complex	4	-0.730229	0.0324444	0.479565	5971	RELB	v-rel reticuloendotheliosis viral oncogene homolog B	0.121221	-0.916421
2939	Ecsit complex (ECSIT, MT-CO2, NDUFA1, MT-ND1, TRAF6, NDUFAF1)	4	0.815666	0.0324706	0.479565	4694	NDUFA1	NADH dehydrogenase (ubiquinone) 1 alpha subcomplex, 1, 7.5kDa	0.838393	0.0765526
2939	Ecsit complex (ECSIT, MT-CO2, NDUFA1, MT-ND1, TRAF6, NDUFAF1)	4	0.815666	0.0324706	0.479565	7189	TRAF6	TNF receptor-associated factor 6	0.468161	0.329605
2939	Ecsit complex (ECSIT, MT-CO2, NDUFA1, MT-ND1, TRAF6, NDUFAF1)	4	0.815666	0.0324706	0.479565	51103	NDUFAF1	NADH dehydrogenase (ubiquinone) 1 alpha subcomplex, assembly factor 1	0.305129	0.515517
2939	Ecsit complex (ECSIT, MT-CO2, NDUFA1, MT-ND1, TRAF6, NDUFAF1)	4	0.815666	0.0324706	0.479565	51295	ECSIT	ECSIT homolog (Drosophila)	0.00456049	2.34099
928	SCRIB-VANGL2 complex	2	-1.03937	0.0332343	0.486686	23513	SCRIB	scribbled homolog (Drosophila)	0.00793243	-2.10059
928	SCRIB-VANGL2 complex	2	-1.03937	0.0332343	0.486686	57216	VANGL2	vang-like 2 (van gogh, Drosophila)	0.950921	0.0218556
13	MUS81-CDS1 complex	2	1.12228	0.0341364	0.495695	1040	CDS1	CDP-diacylglycerol synthase (phosphatidate cytidylyltransferase) 1	0.24641	0.608341
13	MUS81-CDS1 complex	2	1.12228	0.0341364	0.495695	80198	MUS81	MUS81 endonuclease homolog (S. cerevisiae)	0.0231087	1.63622
2470	p130Cas-ER-alpha-cSrc-kinase- PI3-kinase p85-subunit complex	4	0.800546	0.0351823	0.499271	2099	ESR1	estrogen receptor 1	0.777849	0.109105
2470	p130Cas-ER-alpha-cSrc-kinase- PI3-kinase p85-subunit complex	4	0.800546	0.0351823	0.499271	5295	PIK3R1	phosphoinositide-3-kinase, regulatory subunit 1 (alpha)	0.837813	-0.0768529
2470	p130Cas-ER-alpha-cSrc-kinase- PI3-kinase p85-subunit complex	4	0.800546	0.0351823	0.499271	6714	SRC	v-src sarcoma (Schmidt-Ruppin A-2) viral oncogene homolog (avian)	0.424271	-0.372356
2470	p130Cas-ER-alpha-cSrc-kinase- PI3-kinase p85-subunit complex	4	0.800546	0.0351823	0.499271	9564	BCAR1	breast cancer anti-estrogen resistance 1	0.000286887	3.54229
3231	Eps15-stonin2 complex	2	1.113	0.0353429	0.499271	2060	EPS15	epidermal growth factor receptor pathway substrate 15	0.00140182	2.85331
3231	Eps15-stonin2 complex	2	1.113	0.0353429	0.499271	85439	STON2	stonin 2	0.235879	-0.62731
2054	CASP8-FADD-MALT1-BCL10 complex	4	0.796107	0.0360128	0.499271	841	CASP8	caspase 8, apoptosis-related cysteine peptidase	0.521802	0.282495
2054	CASP8-FADD-MALT1-BCL10 complex	4	0.796107	0.0360128	0.499271	8772	FADD	Fas (TNFRSF6)-associated via death domain	0.0821447	1.08542
2054	CASP8-FADD-MALT1-BCL10 complex	4	0.796107	0.0360128	0.499271	8915	BCL10	B-cell CLL/lymphoma 10	0.85868	-0.0661688
2054	CASP8-FADD-MALT1-BCL10 complex	4	0.796107	0.0360128	0.499271	10892	MALT1	mucosa associated lymphoid tissue lymphoma translocation gene 1	0.0131014	1.88268
4158	HSP90-FKBP38-CAM-Ca(2+) complex	3	-0.840909	0.0361319	0.499271	805	CALM2	calmodulin 2 (phosphorylase kinase, delta)	0.0828269	1.08183
4158	HSP90-FKBP38-CAM-Ca(2+) complex	3	-0.840909	0.0361319	0.499271	3326	HSP90AB1	heat shock protein 90kDa alpha (cytosolic), class B member 1	0.0347186	-1.45944
4158	HSP90-FKBP38-CAM-Ca(2+) complex	3	-0.840909	0.0361319	0.499271	23770	FKBP8	FK506 binding protein 8, 38kDa	0.00715948	-2.14512
2743	TRAF6-MALT1 complex	2	1.10614	0.0362562	0.499271	7189	TRAF6	TNF receptor-associated factor 6	0.468161	0.329605
2743	TRAF6-MALT1 complex	2	1.10614	0.0362562	0.499271	10892	MALT1	mucosa associated lymphoid tissue lymphoma translocation gene 1	0.0131014	1.88268
1380	Elongator holo complex	4	0.793546	0.0364993	0.499271	8518	IKBKAP	inhibitor of kappa light polypeptide gene enhancer in B-cells, kinase complex-associated protein	0.21197	0.673726
1380	Elongator holo complex	4	0.793546	0.0364993	0.499271	26610	ELP4	elongation protein 4 homolog (S. cerevisiae)	0.0216678	1.66419
1380	Elongator holo complex	4	0.793546	0.0364993	0.499271	55140	ELP3	elongation protein 3 homolog (S. cerevisiae)	0.210112	0.677549
1380	Elongator holo complex	4	0.793546	0.0364993	0.499271	55250	ELP2	elongation protein 2 homolog (S. cerevisiae)	0.693873	0.15872
5107	p34(SEI-1)-CDK4-CyclinD2 complex	3	0.918146	0.0368341	0.499271	894	CCND2	cyclin D2	0.541159	0.266675
5107	p34(SEI-1)-CDK4-CyclinD2 complex	3	0.918146	0.0368341	0.499271	1019	CDK4	cyclin-dependent kinase 4	0.391005	0.407817
5107	p34(SEI-1)-CDK4-CyclinD2 complex	3	0.918146	0.0368341	0.499271	29950	SERTAD1	SERTA domain containing 1	0.00831865	2.07995
305	40S ribosomal subunit, cytoplasmic	33	-0.213248	0.0379905	0.499271	2197	FAU	Finkel-Biskis-Reilly murine sarcoma virus (FBR-MuSV) ubiquitously expressed	0.338524	-0.470411
305	40S ribosomal subunit, cytoplasmic	33	-0.213248	0.0379905	0.499271	3921	RPSA	ribosomal protein SA	0.460618	-0.336659
305	40S ribosomal subunit, cytoplasmic	33	-0.213248	0.0379905	0.499271	6187	RPS2	ribosomal protein S2	0.576643	0.239093
305	40S ribosomal subunit, cytoplasmic	33	-0.213248	0.0379905	0.499271	6188	RPS3	ribosomal protein S3	0.138432	-0.858764
305	40S ribosomal subunit, cytoplasmic	33	-0.213248	0.0379905	0.499271	6189	RPS3A	ribosomal protein S3A	0.129888	0.886431
305	40S ribosomal subunit, cytoplasmic	33	-0.213248	0.0379905	0.499271	6191	RPS4X	ribosomal protein S4, X-linked	0.79976	-0.0970405
305	40S ribosomal subunit, cytoplasmic	33	-0.213248	0.0379905	0.499271	6193	RPS5	ribosomal protein S5	0.0460334	1.33693
305	40S ribosomal subunit, cytoplasmic	33	-0.213248	0.0379905	0.499271	6194	RPS6	ribosomal protein S6	0.600072	0.221796
305	40S ribosomal subunit, cytoplasmic	33	-0.213248	0.0379905	0.499271	6201	RPS7	ribosomal protein S7	0.338407	-0.470561
305	40S ribosomal subunit, cytoplasmic	33	-0.213248	0.0379905	0.499271	6202	RPS8	ribosomal protein S8	0.50548	-0.296296
305	40S ribosomal subunit, cytoplasmic	33	-0.213248	0.0379905	0.499271	6203	RPS9	ribosomal protein S9	0.875308	-0.0578393
305	40S ribosomal subunit, cytoplasmic	33	-0.213248	0.0379905	0.499271	6204	RPS10	ribosomal protein S10	0.697313	-0.156572
305	40S ribosomal subunit, cytoplasmic	33	-0.213248	0.0379905	0.499271	6205	RPS11	ribosomal protein S11	0.818289	-0.0870934
305	40S ribosomal subunit, cytoplasmic	33	-0.213248	0.0379905	0.499271	6206	RPS12	ribosomal protein S12	0.716412	-0.144837
305	40S ribosomal subunit, cytoplasmic	33	-0.213248	0.0379905	0.499271	6207	RPS13	ribosomal protein S13	0.0422796	-1.37387
305	40S ribosomal subunit, cytoplasmic	33	-0.213248	0.0379905	0.499271	6208	RPS14	ribosomal protein S14	0.190663	-0.719733
305	40S ribosomal subunit, cytoplasmic	33	-0.213248	0.0379905	0.499271	6209	RPS15	ribosomal protein S15	0.43139	-0.36513
305	40S ribosomal subunit, cytoplasmic	33	-0.213248	0.0379905	0.499271	6210	RPS15A	ribosomal protein S15a	0.0658536	-1.18142
305	40S ribosomal subunit, cytoplasmic	33	-0.213248	0.0379905	0.499271	6217	RPS16	ribosomal protein S16	0.134363	-0.871721
305	40S ribosomal subunit, cytoplasmic	33	-0.213248	0.0379905	0.499271	6218	RPS17	ribosomal protein S17	0.854873	0.0680984
305	40S ribosomal subunit, cytoplasmic	33	-0.213248	0.0379905	0.499271	6222	RPS18	ribosomal protein S18	0.408952	-0.388327
305	40S ribosomal subunit, cytoplasmic	33	-0.213248	0.0379905	0.499271	6223	RPS19	ribosomal protein S19	0.865637	0.0626643
305	40S ribosomal subunit, cytoplasmic	33	-0.213248	0.0379905	0.499271	6224	RPS20	ribosomal protein S20	0.0136619	-1.86449
305	40S ribosomal subunit, cytoplasmic	33	-0.213248	0.0379905	0.499271	6227	RPS21	ribosomal protein S21	0.0739299	-1.13118
305	40S ribosomal subunit, cytoplasmic	33	-0.213248	0.0379905	0.499271	6228	RPS23	ribosomal protein S23	0.794326	-0.100001
305	40S ribosomal subunit, cytoplasmic	33	-0.213248	0.0379905	0.499271	6229	RPS24	ribosomal protein S24	0.170116	0.769254
305	40S ribosomal subunit, cytoplasmic	33	-0.213248	0.0379905	0.499271	6230	RPS25	ribosomal protein S25	0.506588	0.295345
305	40S ribosomal subunit, cytoplasmic	33	-0.213248	0.0379905	0.499271	6231	RPS26	ribosomal protein S26	0.359616	-0.444161
305	40S ribosomal subunit, cytoplasmic	33	-0.213248	0.0379905	0.499271	6232	RPS27	ribosomal protein S27	0.711256	-0.147974
305	40S ribosomal subunit, cytoplasmic	33	-0.213248	0.0379905	0.499271	6233	RPS27A	ribosomal protein S27a	0.233087	0.632482
305	40S ribosomal subunit, cytoplasmic	33	-0.213248	0.0379905	0.499271	6234	RPS28	ribosomal protein S28	0.682992	0.165585
305	40S ribosomal subunit, cytoplasmic	33	-0.213248	0.0379905	0.499271	6235	RPS29	ribosomal protein S29	0.693813	0.158758
305	40S ribosomal subunit, cytoplasmic	33	-0.213248	0.0379905	0.499271	140032	RPS4Y2	ribosomal protein S4, Y-linked 2	0.490292	-0.309545
2938	Ecsit complex (ECSIT, NDUFS3, TOM20)	3	0.906906	0.0387187	0.499271	4722	NDUFS3	NADH dehydrogenase (ubiquinone) Fe-S protein 3, 30kDa (NADH-coenzyme Q reductase)	0.713659	0.146509
2938	Ecsit complex (ECSIT, NDUFS3, TOM20)	3	0.906906	0.0387187	0.499271	9804	TOMM20	translocase of outer mitochondrial membrane 20 homolog (yeast)	0.584495	0.233219
2938	Ecsit complex (ECSIT, NDUFS3, TOM20)	3	0.906906	0.0387187	0.499271	51295	ECSIT	ECSIT homolog (Drosophila)	0.00456049	2.34099
1004	RC complex during S-phase of cell cycle	13	-0.365688	0.0390055	0.499271	142	PARP1	poly (ADP-ribose) polymerase 1	0.665407	-0.176913
1004	RC complex during S-phase of cell cycle	13	-0.365688	0.0390055	0.499271	890	CCNA2	cyclin A2	0.290052	-0.537525
1004	RC complex during S-phase of cell cycle	13	-0.365688	0.0390055	0.499271	1017	CDK2	cyclin-dependent kinase 2	0.429349	0.367189
1004	RC complex during S-phase of cell cycle	13	-0.365688	0.0390055	0.499271	3978	LIG1	ligase I, DNA, ATP-dependent	0.171765	-0.765065
1004	RC complex during S-phase of cell cycle	13	-0.365688	0.0390055	0.499271	5422	POLA1	polymerase (DNA directed), alpha 1, catalytic subunit	0.259973	0.585071
1004	RC complex during S-phase of cell cycle	13	-0.365688	0.0390055	0.499271	5424	POLD1	polymerase (DNA directed), delta 1, catalytic subunit 125kDa	0.0446883	-1.34981
1004	RC complex during S-phase of cell cycle	13	-0.365688	0.0390055	0.499271	5426	POLE	polymerase (DNA directed), epsilon	0.888585	0.0513011
1004	RC complex during S-phase of cell cycle	13	-0.365688	0.0390055	0.499271	5981	RFC1	replication factor C (activator 1) 1, 145kDa	0.0457917	-1.33921
1004	RC complex during S-phase of cell cycle	13	-0.365688	0.0390055	0.499271	5982	RFC2	replication factor C (activator 1) 2, 40kDa	0.36538	-0.437255
1004	RC complex during S-phase of cell cycle	13	-0.365688	0.0390055	0.499271	6117	RPA1	replication protein A1, 70kDa	0.508755	-0.293491
1004	RC complex during S-phase of cell cycle	13	-0.365688	0.0390055	0.499271	6118	RPA2	replication protein A2, 32kDa	0.930463	-0.0313011
1004	RC complex during S-phase of cell cycle	13	-0.365688	0.0390055	0.499271	6119	RPA3	replication protein A3, 14kDa	0.691569	-0.160164
1004	RC complex during S-phase of cell cycle	13	-0.365688	0.0390055	0.499271	7150	TOP1	topoisomerase (DNA) I	0.215392	-0.666771
1107	DNA synthesome core complex	10	-0.416033	0.0392526	0.499271	5111	PCNA	proliferating cell nuclear antigen	0.204163	-0.690023
1107	DNA synthesome core complex	10	-0.416033	0.0392526	0.499271	5422	POLA1	polymerase (DNA directed), alpha 1, catalytic subunit	0.259973	0.585071
1107	DNA synthesome core complex	10	-0.416033	0.0392526	0.499271	5424	POLD1	polymerase (DNA directed), delta 1, catalytic subunit 125kDa	0.0446883	-1.34981
1107	DNA synthesome core complex	10	-0.416033	0.0392526	0.499271	5425	POLD2	polymerase (DNA directed), delta 2, regulatory subunit 50kDa	0.199627	0.699781
1107	DNA synthesome core complex	10	-0.416033	0.0392526	0.499271	5557	PRIM1	primase, DNA, polypeptide 1 (49kDa)	0.90898	0.0414456
1107	DNA synthesome core complex	10	-0.416033	0.0392526	0.499271	5558	PRIM2	primase, DNA, polypeptide 2 (58kDa)	0.215576	0.666399
1107	DNA synthesome core complex	10	-0.416033	0.0392526	0.499271	5981	RFC1	replication factor C (activator 1) 1, 145kDa	0.0457917	-1.33921
1107	DNA synthesome core complex	10	-0.416033	0.0392526	0.499271	10714	POLD3	polymerase (DNA-directed), delta 3, accessory subunit	0.755365	-0.121843
1107	DNA synthesome core complex	10	-0.416033	0.0392526	0.499271	23649	POLA2	polymerase (DNA directed), alpha 2 (70kD subunit)	0.614774	-0.211284
1107	DNA synthesome core complex	10	-0.416033	0.0392526	0.499271	57804	POLD4	polymerase (DNA-directed), delta 4	0.0036236	-2.44086
2775	MDC1-p53BP1-SMC1 complex	3	-0.821246	0.0394277	0.499271	7158	TP53BP1	tumor protein p53 binding protein 1	0.0190133	-1.72094
2775	MDC1-p53BP1-SMC1 complex	3	-0.821246	0.0394277	0.499271	8243	SMC1A	structural maintenance of chromosomes 1A	0.367479	0.434767
2775	MDC1-p53BP1-SMC1 complex	3	-0.821246	0.0394277	0.499271	9656	MDC1	mediator of DNA-damage checkpoint 1	0.0664411	-1.17756
1098	DNA synthesome complex (13 subunits)	13	-0.362488	0.0401738	0.499271	5111	PCNA	proliferating cell nuclear antigen	0.204163	-0.690023
1098	DNA synthesome complex (13 subunits)	13	-0.362488	0.0401738	0.499271	5422	POLA1	polymerase (DNA directed), alpha 1, catalytic subunit	0.259973	0.585071
1098	DNA synthesome complex (13 subunits)	13	-0.362488	0.0401738	0.499271	5424	POLD1	polymerase (DNA directed), delta 1, catalytic subunit 125kDa	0.0446883	-1.34981
1098	DNA synthesome complex (13 subunits)	13	-0.362488	0.0401738	0.499271	5425	POLD2	polymerase (DNA directed), delta 2, regulatory subunit 50kDa	0.199627	0.699781
1098	DNA synthesome complex (13 subunits)	13	-0.362488	0.0401738	0.499271	5557	PRIM1	primase, DNA, polypeptide 1 (49kDa)	0.90898	0.0414456
1098	DNA synthesome complex (13 subunits)	13	-0.362488	0.0401738	0.499271	5558	PRIM2	primase, DNA, polypeptide 2 (58kDa)	0.215576	0.666399
1098	DNA synthesome complex (13 subunits)	13	-0.362488	0.0401738	0.499271	5981	RFC1	replication factor C (activator 1) 1, 145kDa	0.0457917	-1.33921
1098	DNA synthesome complex (13 subunits)	13	-0.362488	0.0401738	0.499271	6117	RPA1	replication protein A1, 70kDa	0.508755	-0.293491
1098	DNA synthesome complex (13 subunits)	13	-0.362488	0.0401738	0.499271	7150	TOP1	topoisomerase (DNA) I	0.215392	-0.666771
1098	DNA synthesome complex (13 subunits)	13	-0.362488	0.0401738	0.499271	7155	TOP2B	topoisomerase (DNA) II beta 180kDa	0.390614	0.408252
1098	DNA synthesome complex (13 subunits)	13	-0.362488	0.0401738	0.499271	10714	POLD3	polymerase (DNA-directed), delta 3, accessory subunit	0.755365	-0.121843
1098	DNA synthesome complex (13 subunits)	13	-0.362488	0.0401738	0.499271	23649	POLA2	polymerase (DNA directed), alpha 2 (70kD subunit)	0.614774	-0.211284
1098	DNA synthesome complex (13 subunits)	13	-0.362488	0.0401738	0.499271	57804	POLD4	polymerase (DNA-directed), delta 4	0.0036236	-2.44086
162	Conserved oligomeric Golgi (COG) complex	8	0.56137	0.0402766	0.499271	9382	COG1	component of oligomeric golgi complex 1	0.244398	-0.611903
162	Conserved oligomeric Golgi (COG) complex	8	0.56137	0.0402766	0.499271	10466	COG5	component of oligomeric golgi complex 5	0.00202323	2.69396
162	Conserved oligomeric Golgi (COG) complex	8	0.56137	0.0402766	0.499271	22796	COG2	component of oligomeric golgi complex 2	0.470088	0.327821
162	Conserved oligomeric Golgi (COG) complex	8	0.56137	0.0402766	0.499271	25839	COG4	component of oligomeric golgi complex 4	0.232682	-0.633238
162	Conserved oligomeric Golgi (COG) complex	8	0.56137	0.0402766	0.499271	57511	COG6	component of oligomeric golgi complex 6	0.007646	2.11657
162	Conserved oligomeric Golgi (COG) complex	8	0.56137	0.0402766	0.499271	83548	COG3	component of oligomeric golgi complex 3	0.918228	-0.0370493
162	Conserved oligomeric Golgi (COG) complex	8	0.56137	0.0402766	0.499271	84342	COG8	component of oligomeric golgi complex 8	0.0497593	1.30313
162	Conserved oligomeric Golgi (COG) complex	8	0.56137	0.0402766	0.499271	91949	COG7	component of oligomeric golgi complex 7	0.214627	-0.668315
3522	COG complex	8	0.56137	0.0402766	0.499271	9382	COG1	component of oligomeric golgi complex 1	0.244398	-0.611903
3522	COG complex	8	0.56137	0.0402766	0.499271	10466	COG5	component of oligomeric golgi complex 5	0.00202323	2.69396
3522	COG complex	8	0.56137	0.0402766	0.499271	22796	COG2	component of oligomeric golgi complex 2	0.470088	0.327821
3522	COG complex	8	0.56137	0.0402766	0.499271	25839	COG4	component of oligomeric golgi complex 4	0.232682	-0.633238
3522	COG complex	8	0.56137	0.0402766	0.499271	57511	COG6	component of oligomeric golgi complex 6	0.007646	2.11657
3522	COG complex	8	0.56137	0.0402766	0.499271	83548	COG3	component of oligomeric golgi complex 3	0.918228	-0.0370493
3522	COG complex	8	0.56137	0.0402766	0.499271	84342	COG8	component of oligomeric golgi complex 8	0.0497593	1.30313
3522	COG complex	8	0.56137	0.0402766	0.499271	91949	COG7	component of oligomeric golgi complex 7	0.214627	-0.668315
3556	COG complex	8	0.56137	0.0402766	0.499271	9382	COG1	component of oligomeric golgi complex 1	0.244398	-0.611903
3556	COG complex	8	0.56137	0.0402766	0.499271	10466	COG5	component of oligomeric golgi complex 5	0.00202323	2.69396
3556	COG complex	8	0.56137	0.0402766	0.499271	22796	COG2	component of oligomeric golgi complex 2	0.470088	0.327821
3556	COG complex	8	0.56137	0.0402766	0.499271	25839	COG4	component of oligomeric golgi complex 4	0.232682	-0.633238
3556	COG complex	8	0.56137	0.0402766	0.499271	57511	COG6	component of oligomeric golgi complex 6	0.007646	2.11657
3556	COG complex	8	0.56137	0.0402766	0.499271	83548	COG3	component of oligomeric golgi complex 3	0.918228	-0.0370493
3556	COG complex	8	0.56137	0.0402766	0.499271	84342	COG8	component of oligomeric golgi complex 8	0.0497593	1.30313
3556	COG complex	8	0.56137	0.0402766	0.499271	91949	COG7	component of oligomeric golgi complex 7	0.214627	-0.668315
2308	AP3D1-AP3S1 complex	2	-0.981782	0.0411242	0.499271	1176	AP3S1	adaptor-related protein complex 3, sigma 1 subunit	0.429914	-0.366619
2308	AP3D1-AP3S1 complex	2	-0.981782	0.0411242	0.499271	8943	AP3D1	adaptor-related protein complex 3, delta 1 subunit	0.0252962	-1.59695
774	THO complex	5	-0.607945	0.0413154	0.499271	8563	THOC5	THO complex 5	0.00978373	-2.0095
774	THO complex	5	-0.607945	0.0413154	0.499271	9984	THOC1	THO complex 1	0.0610634	1.21422
774	THO complex	5	-0.607945	0.0413154	0.499271	57187	THOC2	THO complex 2	0.660186	-0.180334
774	THO complex	5	-0.607945	0.0413154	0.499271	79228	THOC6	THO complex 6 homolog (Drosophila)	0.063988	-1.1939
774	THO complex	5	-0.607945	0.0413154	0.499271	80145	THOC7	THO complex 7 homolog (Drosophila)	0.134831	-0.870211
59	AP3 adapter complex	7	-0.49597	0.0415857	0.499271	1176	AP3S1	adaptor-related protein complex 3, sigma 1 subunit	0.429914	-0.366619
59	AP3 adapter complex	7	-0.49597	0.0415857	0.499271	8120	AP3B2	adaptor-related protein complex 3, beta 2 subunit	0.707251	-0.150426
59	AP3 adapter complex	7	-0.49597	0.0415857	0.499271	8546	AP3B1	adaptor-related protein complex 3, beta 1 subunit	0.0203545	-1.69134
59	AP3 adapter complex	7	-0.49597	0.0415857	0.499271	8943	AP3D1	adaptor-related protein complex 3, delta 1 subunit	0.0252962	-1.59695
59	AP3 adapter complex	7	-0.49597	0.0415857	0.499271	10239	AP3S2	adaptor-related protein complex 3, sigma 2 subunit	0.676247	-0.169895
59	AP3 adapter complex	7	-0.49597	0.0415857	0.499271	10947	AP3M2	adaptor-related protein complex 3, mu 2 subunit	0.447731	-0.348983
59	AP3 adapter complex	7	-0.49597	0.0415857	0.499271	26985	AP3M1	adaptor-related protein complex 3, mu 1 subunit	0.14047	0.852415
5232	TNF-alpha/Nf-kappa B signaling complex (RPL6, RPL30, RPS13, CHUK, DDX3X, NFKB2, NFKBIB, REL, IKBKG, NFKB1, MAP3K8, RELB, GLG1, NFKBIA, RELA, TNIP2, GTF2I)	17	-0.307034	0.0422013	0.499271	1147	CHUK	conserved helix-loop-helix ubiquitous kinase	0.315969	0.500355
5232	TNF-alpha/Nf-kappa B signaling complex (RPL6, RPL30, RPS13, CHUK, DDX3X, NFKB2, NFKBIB, REL, IKBKG, NFKB1, MAP3K8, RELB, GLG1, NFKBIA, RELA, TNIP2, GTF2I)	17	-0.307034	0.0422013	0.499271	1326	MAP3K8	mitogen-activated protein kinase kinase kinase 8	0.291063	0.536013
5232	TNF-alpha/Nf-kappa B signaling complex (RPL6, RPL30, RPS13, CHUK, DDX3X, NFKB2, NFKBIB, REL, IKBKG, NFKB1, MAP3K8, RELB, GLG1, NFKBIA, RELA, TNIP2, GTF2I)	17	-0.307034	0.0422013	0.499271	1654	DDX3X	DEAD (Asp-Glu-Ala-Asp) box polypeptide 3, X-linked	0.435127	0.361384
5232	TNF-alpha/Nf-kappa B signaling complex (RPL6, RPL30, RPS13, CHUK, DDX3X, NFKB2, NFKBIB, REL, IKBKG, NFKB1, MAP3K8, RELB, GLG1, NFKBIA, RELA, TNIP2, GTF2I)	17	-0.307034	0.0422013	0.499271	2734	GLG1	golgi glycoprotein 1	0.544637	-0.263893
5232	TNF-alpha/Nf-kappa B signaling complex (RPL6, RPL30, RPS13, CHUK, DDX3X, NFKB2, NFKBIB, REL, IKBKG, NFKB1, MAP3K8, RELB, GLG1, NFKBIA, RELA, TNIP2, GTF2I)	17	-0.307034	0.0422013	0.499271	2969	GTF2I	general transcription factor IIi	0.652905	0.18515
5232	TNF-alpha/Nf-kappa B signaling complex (RPL6, RPL30, RPS13, CHUK, DDX3X, NFKB2, NFKBIB, REL, IKBKG, NFKB1, MAP3K8, RELB, GLG1, NFKBIA, RELA, TNIP2, GTF2I)	17	-0.307034	0.0422013	0.499271	4790	NFKB1	nuclear factor of kappa light polypeptide gene enhancer in B-cells 1	0.632905	-0.198661
5232	TNF-alpha/Nf-kappa B signaling complex (RPL6, RPL30, RPS13, CHUK, DDX3X, NFKB2, NFKBIB, REL, IKBKG, NFKB1, MAP3K8, RELB, GLG1, NFKBIA, RELA, TNIP2, GTF2I)	17	-0.307034	0.0422013	0.499271	4791	NFKB2	nuclear factor of kappa light polypeptide gene enhancer in B-cells 2 (p49/p100)	0.0254954	-1.59354
5232	TNF-alpha/Nf-kappa B signaling complex (RPL6, RPL30, RPS13, CHUK, DDX3X, NFKB2, NFKBIB, REL, IKBKG, NFKB1, MAP3K8, RELB, GLG1, NFKBIA, RELA, TNIP2, GTF2I)	17	-0.307034	0.0422013	0.499271	4792	NFKBIA	nuclear factor of kappa light polypeptide gene enhancer in B-cells inhibitor, alpha	0.719547	0.142941
5232	TNF-alpha/Nf-kappa B signaling complex (RPL6, RPL30, RPS13, CHUK, DDX3X, NFKB2, NFKBIB, REL, IKBKG, NFKB1, MAP3K8, RELB, GLG1, NFKBIA, RELA, TNIP2, GTF2I)	17	-0.307034	0.0422013	0.499271	4793	NFKBIB	nuclear factor of kappa light polypeptide gene enhancer in B-cells inhibitor, beta	0.73989	-0.130833
5232	TNF-alpha/Nf-kappa B signaling complex (RPL6, RPL30, RPS13, CHUK, DDX3X, NFKB2, NFKBIB, REL, IKBKG, NFKB1, MAP3K8, RELB, GLG1, NFKBIA, RELA, TNIP2, GTF2I)	17	-0.307034	0.0422013	0.499271	5966	REL	v-rel reticuloendotheliosis viral oncogene homolog (avian)	0.438354	0.358175
5232	TNF-alpha/Nf-kappa B signaling complex (RPL6, RPL30, RPS13, CHUK, DDX3X, NFKB2, NFKBIB, REL, IKBKG, NFKB1, MAP3K8, RELB, GLG1, NFKBIA, RELA, TNIP2, GTF2I)	17	-0.307034	0.0422013	0.499271	5970	RELA	v-rel reticuloendotheliosis viral oncogene homolog A (avian)	0.613346	-0.212295
5232	TNF-alpha/Nf-kappa B signaling complex (RPL6, RPL30, RPS13, CHUK, DDX3X, NFKB2, NFKBIB, REL, IKBKG, NFKB1, MAP3K8, RELB, GLG1, NFKBIA, RELA, TNIP2, GTF2I)	17	-0.307034	0.0422013	0.499271	5971	RELB	v-rel reticuloendotheliosis viral oncogene homolog B	0.121221	-0.916421
5232	TNF-alpha/Nf-kappa B signaling complex (RPL6, RPL30, RPS13, CHUK, DDX3X, NFKB2, NFKBIB, REL, IKBKG, NFKB1, MAP3K8, RELB, GLG1, NFKBIA, RELA, TNIP2, GTF2I)	17	-0.307034	0.0422013	0.499271	6128	RPL6	ribosomal protein L6	0.0266673	-1.57402
5232	TNF-alpha/Nf-kappa B signaling complex (RPL6, RPL30, RPS13, CHUK, DDX3X, NFKB2, NFKBIB, REL, IKBKG, NFKB1, MAP3K8, RELB, GLG1, NFKBIA, RELA, TNIP2, GTF2I)	17	-0.307034	0.0422013	0.499271	6156	RPL30	ribosomal protein L30	0.150191	-0.823356
5232	TNF-alpha/Nf-kappa B signaling complex (RPL6, RPL30, RPS13, CHUK, DDX3X, NFKB2, NFKBIB, REL, IKBKG, NFKB1, MAP3K8, RELB, GLG1, NFKBIA, RELA, TNIP2, GTF2I)	17	-0.307034	0.0422013	0.499271	6207	RPS13	ribosomal protein S13	0.0422796	-1.37387
5232	TNF-alpha/Nf-kappa B signaling complex (RPL6, RPL30, RPS13, CHUK, DDX3X, NFKB2, NFKBIB, REL, IKBKG, NFKB1, MAP3K8, RELB, GLG1, NFKBIA, RELA, TNIP2, GTF2I)	17	-0.307034	0.0422013	0.499271	8517	IKBKG	inhibitor of kappa light polypeptide gene enhancer in B-cells, kinase gamma	0.508047	-0.294096
5232	TNF-alpha/Nf-kappa B signaling complex (RPL6, RPL30, RPS13, CHUK, DDX3X, NFKB2, NFKBIB, REL, IKBKG, NFKB1, MAP3K8, RELB, GLG1, NFKBIA, RELA, TNIP2, GTF2I)	17	-0.307034	0.0422013	0.499271	79155	TNIP2	TNFAIP3 interacting protein 2	0.836784	0.0773865
2639	HES1 promoter-Notch enhancer complex	13	-0.356397	0.0424761	0.499271	904	CCNT1	cyclin T1	0.692218	-0.159757
2639	HES1 promoter-Notch enhancer complex	13	-0.356397	0.0424761	0.499271	1022	CDK7	cyclin-dependent kinase 7	0.839152	-0.0761596
2639	HES1 promoter-Notch enhancer complex	13	-0.356397	0.0424761	0.499271	1024	CDK8	cyclin-dependent kinase 8	0.624651	-0.204363
2639	HES1 promoter-Notch enhancer complex	13	-0.356397	0.0424761	0.499271	1025	CDK9	cyclin-dependent kinase 9	0.109377	-0.961074
2639	HES1 promoter-Notch enhancer complex	13	-0.356397	0.0424761	0.499271	2033	EP300	E1A binding protein p300	0.587774	0.23079
2639	HES1 promoter-Notch enhancer complex	13	-0.356397	0.0424761	0.499271	3516	RBPJ	recombination signal binding protein for immunoglobulin kappa J region	0.573554	-0.241426
2639	HES1 promoter-Notch enhancer complex	13	-0.356397	0.0424761	0.499271	4851	NOTCH1	notch 1	0.0852762	-1.06917
2639	HES1 promoter-Notch enhancer complex	13	-0.356397	0.0424761	0.499271	5430	POLR2A	polymerase (RNA) II (DNA directed) polypeptide A, 220kDa	0.0666343	-1.1763
2639	HES1 promoter-Notch enhancer complex	13	-0.356397	0.0424761	0.499271	5469	MED1	mediator complex subunit 1	0.0914742	-1.0387
2639	HES1 promoter-Notch enhancer complex	13	-0.356397	0.0424761	0.499271	6830	SUPT6H	suppressor of Ty 6 homolog (S. cerevisiae)	0.365675	0.436904
2639	HES1 promoter-Notch enhancer complex	13	-0.356397	0.0424761	0.499271	9794	MAML1	mastermind-like 1 (Drosophila)	0.30228	-0.519591
2639	HES1 promoter-Notch enhancer complex	13	-0.356397	0.0424761	0.499271	11198	SUPT16H	suppressor of Ty 16 homolog (S. cerevisiae)	0.476255	0.32216
2639	HES1 promoter-Notch enhancer complex	13	-0.356397	0.0424761	0.499271	51763	INPP5K	inositol polyphosphate-5-phosphatase K	0.666095	-0.176464
2913	PLC-gamma-2-LAT complex	2	-0.971997	0.0426048	0.499271	5336	PLCG2	phospholipase C, gamma 2 (phosphatidylinositol-specific)	0.551533	-0.258429
2913	PLC-gamma-2-LAT complex	2	-0.971997	0.0426048	0.499271	27040	LAT	linker for activation of T cells	0.0206269	-1.68557
2536	PLC-gamma-2-SLP-76-Lyn-Grb2 complex	4	0.762665	0.0427986	0.499271	2885	GRB2	growth factor receptor-bound protein 2	0.010854	1.96441
2536	PLC-gamma-2-SLP-76-Lyn-Grb2 complex	4	0.762665	0.0427986	0.499271	3937	LCP2	lymphocyte cytosolic protein 2 (SH2 domain containing leukocyte protein of 76kDa)	0.123834	0.907161
2536	PLC-gamma-2-SLP-76-Lyn-Grb2 complex	4	0.762665	0.0427986	0.499271	4067	LYN	v-yes-1 Yamaguchi sarcoma viral related oncogene homolog	0.36516	0.437516
2536	PLC-gamma-2-SLP-76-Lyn-Grb2 complex	4	0.762665	0.0427986	0.499271	5336	PLCG2	phospholipase C, gamma 2 (phosphatidylinositol-specific)	0.551533	-0.258429
5695	TIP5-DNMT-HDAC1 complex	4	-0.673894	0.0434951	0.499271	1786	DNMT1	DNA (cytosine-5-)-methyltransferase 1	0.433078	-0.363434
5695	TIP5-DNMT-HDAC1 complex	4	-0.673894	0.0434951	0.499271	1789	DNMT3B	DNA (cytosine-5-)-methyltransferase 3 beta	0.0535323	-1.27138
5695	TIP5-DNMT-HDAC1 complex	4	-0.673894	0.0434951	0.499271	3065	HDAC1	histone deacetylase 1	0.729001	-0.137272
5695	TIP5-DNMT-HDAC1 complex	4	-0.673894	0.0434951	0.499271	11176	BAZ2A	bromodomain adjacent to zinc finger domain, 2A	0.119265	-0.923486
3089	CCND3-CDK6 complex	2	1.05543	0.0436275	0.499271	896	CCND3	cyclin D3	0.0610609	1.21424
3089	CCND3-CDK6 complex	2	1.05543	0.0436275	0.499271	1021	CDK6	cyclin-dependent kinase 6	0.126875	0.896623
338	40S ribosomal subunit, cytoplasmic	31	-0.212247	0.0442221	0.499271	2197	FAU	Finkel-Biskis-Reilly murine sarcoma virus (FBR-MuSV) ubiquitously expressed	0.338524	-0.470411
338	40S ribosomal subunit, cytoplasmic	31	-0.212247	0.0442221	0.499271	3921	RPSA	ribosomal protein SA	0.460618	-0.336659
338	40S ribosomal subunit, cytoplasmic	31	-0.212247	0.0442221	0.499271	6187	RPS2	ribosomal protein S2	0.576643	0.239093
338	40S ribosomal subunit, cytoplasmic	31	-0.212247	0.0442221	0.499271	6188	RPS3	ribosomal protein S3	0.138432	-0.858764
338	40S ribosomal subunit, cytoplasmic	31	-0.212247	0.0442221	0.499271	6189	RPS3A	ribosomal protein S3A	0.129888	0.886431
338	40S ribosomal subunit, cytoplasmic	31	-0.212247	0.0442221	0.499271	6191	RPS4X	ribosomal protein S4, X-linked	0.79976	-0.0970405
338	40S ribosomal subunit, cytoplasmic	31	-0.212247	0.0442221	0.499271	6193	RPS5	ribosomal protein S5	0.0460334	1.33693
338	40S ribosomal subunit, cytoplasmic	31	-0.212247	0.0442221	0.499271	6194	RPS6	ribosomal protein S6	0.600072	0.221796
338	40S ribosomal subunit, cytoplasmic	31	-0.212247	0.0442221	0.499271	6201	RPS7	ribosomal protein S7	0.338407	-0.470561
338	40S ribosomal subunit, cytoplasmic	31	-0.212247	0.0442221	0.499271	6202	RPS8	ribosomal protein S8	0.50548	-0.296296
338	40S ribosomal subunit, cytoplasmic	31	-0.212247	0.0442221	0.499271	6203	RPS9	ribosomal protein S9	0.875308	-0.0578393
338	40S ribosomal subunit, cytoplasmic	31	-0.212247	0.0442221	0.499271	6204	RPS10	ribosomal protein S10	0.697313	-0.156572
338	40S ribosomal subunit, cytoplasmic	31	-0.212247	0.0442221	0.499271	6205	RPS11	ribosomal protein S11	0.818289	-0.0870934
338	40S ribosomal subunit, cytoplasmic	31	-0.212247	0.0442221	0.499271	6206	RPS12	ribosomal protein S12	0.716412	-0.144837
338	40S ribosomal subunit, cytoplasmic	31	-0.212247	0.0442221	0.499271	6207	RPS13	ribosomal protein S13	0.0422796	-1.37387
338	40S ribosomal subunit, cytoplasmic	31	-0.212247	0.0442221	0.499271	6208	RPS14	ribosomal protein S14	0.190663	-0.719733
338	40S ribosomal subunit, cytoplasmic	31	-0.212247	0.0442221	0.499271	6209	RPS15	ribosomal protein S15	0.43139	-0.36513
338	40S ribosomal subunit, cytoplasmic	31	-0.212247	0.0442221	0.499271	6210	RPS15A	ribosomal protein S15a	0.0658536	-1.18142
338	40S ribosomal subunit, cytoplasmic	31	-0.212247	0.0442221	0.499271	6217	RPS16	ribosomal protein S16	0.134363	-0.871721
338	40S ribosomal subunit, cytoplasmic	31	-0.212247	0.0442221	0.499271	6218	RPS17	ribosomal protein S17	0.854873	0.0680984
338	40S ribosomal subunit, cytoplasmic	31	-0.212247	0.0442221	0.499271	6222	RPS18	ribosomal protein S18	0.408952	-0.388327
338	40S ribosomal subunit, cytoplasmic	31	-0.212247	0.0442221	0.499271	6223	RPS19	ribosomal protein S19	0.865637	0.0626643
338	40S ribosomal subunit, cytoplasmic	31	-0.212247	0.0442221	0.499271	6224	RPS20	ribosomal protein S20	0.0136619	-1.86449
338	40S ribosomal subunit, cytoplasmic	31	-0.212247	0.0442221	0.499271	6227	RPS21	ribosomal protein S21	0.0739299	-1.13118
338	40S ribosomal subunit, cytoplasmic	31	-0.212247	0.0442221	0.499271	6228	RPS23	ribosomal protein S23	0.794326	-0.100001
338	40S ribosomal subunit, cytoplasmic	31	-0.212247	0.0442221	0.499271	6229	RPS24	ribosomal protein S24	0.170116	0.769254
338	40S ribosomal subunit, cytoplasmic	31	-0.212247	0.0442221	0.499271	6230	RPS25	ribosomal protein S25	0.506588	0.295345
338	40S ribosomal subunit, cytoplasmic	31	-0.212247	0.0442221	0.499271	6231	RPS26	ribosomal protein S26	0.359616	-0.444161
338	40S ribosomal subunit, cytoplasmic	31	-0.212247	0.0442221	0.499271	6233	RPS27A	ribosomal protein S27a	0.233087	0.632482
338	40S ribosomal subunit, cytoplasmic	31	-0.212247	0.0442221	0.499271	6234	RPS28	ribosomal protein S28	0.682992	0.165585
338	40S ribosomal subunit, cytoplasmic	31	-0.212247	0.0442221	0.499271	6235	RPS29	ribosomal protein S29	0.693813	0.158758
5239	CAP(C)-CAP(E) complex	2	1.04769	0.0448528	0.499271	10051	SMC4	structural maintenance of chromosomes 4	0.0170173	1.76911
5239	CAP(C)-CAP(E) complex	2	1.04769	0.0448528	0.499271	10592	SMC2	structural maintenance of chromosomes 2	0.471779	0.326262
681	(C-CFTR)2-NHERF-ezrin complex	3	-0.790156	0.0451343	0.499271	1080	CFTR	cystic fibrosis transmembrane conductance regulator (ATP-binding cassette sub-family C, member 7)	0.0388785	-1.41029
681	(C-CFTR)2-NHERF-ezrin complex	3	-0.790156	0.0451343	0.499271	7430	EZR	ezrin	0.332818	-0.477793
681	(C-CFTR)2-NHERF-ezrin complex	3	-0.790156	0.0451343	0.499271	9368	SLC9A3R1	solute carrier family 9 (sodium/hydrogen exchanger), member 3 regulator 1	0.329318	-0.482384
682	C-CFTR-NHERF(PDZ1 domain)-ezrin complex	3	-0.790156	0.0451343	0.499271	1080	CFTR	cystic fibrosis transmembrane conductance regulator (ATP-binding cassette sub-family C, member 7)	0.0388785	-1.41029
682	C-CFTR-NHERF(PDZ1 domain)-ezrin complex	3	-0.790156	0.0451343	0.499271	7430	EZR	ezrin	0.332818	-0.477793
682	C-CFTR-NHERF(PDZ1 domain)-ezrin complex	3	-0.790156	0.0451343	0.499271	9368	SLC9A3R1	solute carrier family 9 (sodium/hydrogen exchanger), member 3 regulator 1	0.329318	-0.482384
683	C-CFTR-NHERF(PDZ2 domain)-ezrin complex	3	-0.790156	0.0451343	0.499271	1080	CFTR	cystic fibrosis transmembrane conductance regulator (ATP-binding cassette sub-family C, member 7)	0.0388785	-1.41029
683	C-CFTR-NHERF(PDZ2 domain)-ezrin complex	3	-0.790156	0.0451343	0.499271	7430	EZR	ezrin	0.332818	-0.477793
683	C-CFTR-NHERF(PDZ2 domain)-ezrin complex	3	-0.790156	0.0451343	0.499271	9368	SLC9A3R1	solute carrier family 9 (sodium/hydrogen exchanger), member 3 regulator 1	0.329318	-0.482384
1248	Apoptosome	2	1.04208	0.0457576	0.499271	317	APAF1	apoptotic peptidase activating factor 1	0.030872	1.51044
1248	Apoptosome	2	1.04208	0.0457576	0.499271	54205	CYCS	cytochrome c, somatic	0.266859	0.573718
1457	AFF1-MLLT1-CBX8 complex	3	-0.786234	0.045899	0.499271	4298	MLLT1	myeloid/lymphoid or mixed-lineage leukemia (trithorax homolog, Drosophila); translocated to, 1	0.0919444	-1.03647
1457	AFF1-MLLT1-CBX8 complex	3	-0.786234	0.045899	0.499271	4299	AFF1	AF4/FMR2 family, member 1	0.597083	-0.223965
1457	AFF1-MLLT1-CBX8 complex	3	-0.786234	0.045899	0.499271	57332	CBX8	chromobox homolog 8	0.0797513	-1.09826
5386	MLL1-WDR5 complex	27	-0.222738	0.0461681	0.499271	1876	E2F6	E2F transcription factor 6	0.93896	0.0273529
5386	MLL1-WDR5 complex	27	-0.222738	0.0461681	0.499271	3054	HCFC1	host cell factor C1 (VP16-accessory protein)	0.909952	0.0409816
5386	MLL1-WDR5 complex	27	-0.222738	0.0461681	0.499271	3308	HSPA4	heat shock 70kDa protein 4	0.196702	0.706191
5386	MLL1-WDR5 complex	27	-0.222738	0.0461681	0.499271	4297	MLL	myeloid/lymphoid or mixed-lineage leukemia (trithorax homolog, Drosophila)	0.586941	0.231405
5386	MLL1-WDR5 complex	27	-0.222738	0.0461681	0.499271	5929	RBBP5	retinoblastoma binding protein 5	0.861264	-0.0648636
5386	MLL1-WDR5 complex	27	-0.222738	0.0461681	0.499271	6045	RNF2	ring finger protein 2	0.684388	-0.164698
5386	MLL1-WDR5 complex	27	-0.222738	0.0461681	0.499271	6872	TAF1	TAF1 RNA polymerase II, TATA box binding protein (TBP)-associated factor, 250kDa	0.183738	0.7358
5386	MLL1-WDR5 complex	27	-0.222738	0.0461681	0.499271	6874	TAF4	TAF4 RNA polymerase II, TATA box binding protein (TBP)-associated factor, 135kDa	0.645657	0.189998
5386	MLL1-WDR5 complex	27	-0.222738	0.0461681	0.499271	6878	TAF6	TAF6 RNA polymerase II, TATA box binding protein (TBP)-associated factor, 80kDa	0.226988	-0.643998
5386	MLL1-WDR5 complex	27	-0.222738	0.0461681	0.499271	6879	TAF7	TAF7 RNA polymerase II, TATA box binding protein (TBP)-associated factor, 55kDa	0.425705	0.370891
5386	MLL1-WDR5 complex	27	-0.222738	0.0461681	0.499271	6880	TAF9	TAF9 RNA polymerase II, TATA box binding protein (TBP)-associated factor, 32kDa	0.316188	-0.500055
5386	MLL1-WDR5 complex	27	-0.222738	0.0461681	0.499271	8607	RUVBL1	RuvB-like 1 (E. coli)	0.482905	-0.316139
5386	MLL1-WDR5 complex	27	-0.222738	0.0461681	0.499271	8972	MGAM	maltase-glucoamylase (alpha-glucosidase)	0.849443	0.0708656
5386	MLL1-WDR5 complex	27	-0.222738	0.0461681	0.499271	9070	ASH2L	ash2 (absent, small, or homeotic)-like (Drosophila)	0.419159	-0.377621
5386	MLL1-WDR5 complex	27	-0.222738	0.0461681	0.499271	10445	MCRS1	microspherule protein 1	0.0439638	-1.3569
5386	MLL1-WDR5 complex	27	-0.222738	0.0461681	0.499271	11091	WDR5	WD repeat domain 5	0.0233649	-1.63144
5386	MLL1-WDR5 complex	27	-0.222738	0.0461681	0.499271	26121	PRPF31	PRP31 pre-mRNA processing factor 31 homolog (S. cerevisiae)	0.0294939	-1.53027
5386	MLL1-WDR5 complex	27	-0.222738	0.0461681	0.499271	26168	SENP3	SUMO1/sentrin/SMT3 specific peptidase 3	0.0438216	-1.35831
5386	MLL1-WDR5 complex	27	-0.222738	0.0461681	0.499271	27043	PELP1	proline, glutamate and leucine rich protein 1	0.72868	-0.137463
5386	MLL1-WDR5 complex	27	-0.222738	0.0461681	0.499271	51230	PHF20	PHD finger protein 20	0.66904	-0.174548
5386	MLL1-WDR5 complex	27	-0.222738	0.0461681	0.499271	54881	TEX10	testis expressed 10	0.985226	0.00646395
5386	MLL1-WDR5 complex	27	-0.222738	0.0461681	0.499271	57680	CHD8	chromodomain helicase DNA binding protein 8	0.131136	0.882278
5386	MLL1-WDR5 complex	27	-0.222738	0.0461681	0.499271	81887	LAS1L	LAS1-like (S. cerevisiae)	0.790963	-0.101844
5386	MLL1-WDR5 complex	27	-0.222738	0.0461681	0.499271	84148	MYST1	MYST histone acetyltransferase 1	0.882053	-0.0545053
5386	MLL1-WDR5 complex	27	-0.222738	0.0461681	0.499271	124944	C17orf49	chromosome 17 open reading frame 49	0.16964	-0.77047
5386	MLL1-WDR5 complex	27	-0.222738	0.0461681	0.499271	125476	INO80C	INO80 complex subunit C	0.954519	0.0202152
5386	MLL1-WDR5 complex	27	-0.222738	0.0461681	0.499271	284058	KIAA1267	KIAA1267	0.770488	-0.113234
5873	RAF1-MAP2K1-YWHAE complex	3	0.864812	0.0464847	0.499271	5604	MAP2K1	mitogen-activated protein kinase kinase 1	0.0106762	1.97158
5873	RAF1-MAP2K1-YWHAE complex	3	0.864812	0.0464847	0.499271	5894	RAF1	v-raf-1 murine leukemia viral oncogene homolog 1	0.213638	0.670321
5873	RAF1-MAP2K1-YWHAE complex	3	0.864812	0.0464847	0.499271	7531	YWHAE	tyrosine 3-monooxygenase/tryptophan 5-monooxygenase activation protein, epsilon polypeptide	0.89646	-0.0474689
2723	ATM-NBS1 complex	2	1.02531	0.048549	0.499271	472	ATM	ataxia telangiectasia mutated	0.00663988	2.17784
2723	ATM-NBS1 complex	2	1.02531	0.048549	0.499271	4683	NBN	nibrin	0.746083	-0.127213
770	TREX complex	8	-0.440193	0.0492734	0.499271	7919	DDX39B	DEAD (Asp-Glu-Ala-Asp) box polypeptide 39B	0.675815	-0.170172
770	TREX complex	8	-0.440193	0.0492734	0.499271	8563	THOC5	THO complex 5	0.00978373	-2.0095
770	TREX complex	8	-0.440193	0.0492734	0.499271	9984	THOC1	THO complex 1	0.0610634	1.21422
770	TREX complex	8	-0.440193	0.0492734	0.499271	10189	THOC4	THO complex 4	0.662331	0.178925
770	TREX complex	8	-0.440193	0.0492734	0.499271	57187	THOC2	THO complex 2	0.660186	-0.180334
770	TREX complex	8	-0.440193	0.0492734	0.499271	79228	THOC6	THO complex 6 homolog (Drosophila)	0.063988	-1.1939
770	TREX complex	8	-0.440193	0.0492734	0.499271	80145	THOC7	THO complex 7 homolog (Drosophila)	0.134831	-0.870211
770	TREX complex	8	-0.440193	0.0492734	0.499271	84321	THOC3	THO complex 3	0.323169	-0.490571
245	FA core complex (Fanconi anemia core complex)	9	0.508595	0.049543	0.499271	2175	FANCA	Fanconi anemia, complementation group A	0.0299133	1.52414
245	FA core complex (Fanconi anemia core complex)	9	0.508595	0.049543	0.499271	2176	FANCC	Fanconi anemia, complementation group C	0.000160155	3.79546
245	FA core complex (Fanconi anemia core complex)	9	0.508595	0.049543	0.499271	2178	FANCE	Fanconi anemia, complementation group E	0.46227	-0.335104
245	FA core complex (Fanconi anemia core complex)	9	0.508595	0.049543	0.499271	2187	FANCB	Fanconi anemia, complementation group B	0.644439	-0.190818
245	FA core complex (Fanconi anemia core complex)	9	0.508595	0.049543	0.499271	2188	FANCF	Fanconi anemia, complementation group F	0.109125	0.962075
245	FA core complex (Fanconi anemia core complex)	9	0.508595	0.049543	0.499271	2189	FANCG	Fanconi anemia, complementation group G	0.0819282	-1.08657
245	FA core complex (Fanconi anemia core complex)	9	0.508595	0.049543	0.499271	55120	FANCL	Fanconi anemia, complementation group L	0.626463	0.203105
245	FA core complex (Fanconi anemia core complex)	9	0.508595	0.049543	0.499271	80010	RMI1	RMI1, RecQ mediated genome instability 1, homolog (S. cerevisiae)	0.0126247	-1.89878
245	FA core complex (Fanconi anemia core complex)	9	0.508595	0.049543	0.499271	80233	C17orf70	chromosome 17 open reading frame 70	0.0248972	1.60385
5190	TIAM1-EFNB1-EPHA2 complex	3	-0.768105	0.0495707	0.499271	1947	EFNB1	ephrin-B1	0.150137	-0.823514
5190	TIAM1-EFNB1-EPHA2 complex	3	-0.768105	0.0495707	0.499271	1969	EPHA2	EPH receptor A2	0.0891572	-1.04984
5190	TIAM1-EFNB1-EPHA2 complex	3	-0.768105	0.0495707	0.499271	7074	TIAM1	T-cell lymphoma invasion and metastasis 1	0.370715	-0.430959
551	TDT-TDIF2-core-histone complex	3	0.845031	0.0505431	0.499271	1791	DNTT	deoxynucleotidyltransferase, terminal	0.145479	0.837199
551	TDT-TDIF2-core-histone complex	3	0.845031	0.0505431	0.499271	30836	DNTTIP2	deoxynucleotidyltransferase, terminal, interacting protein 2	0.115358	0.937951
551	TDT-TDIF2-core-histone complex	3	0.845031	0.0505431	0.499271	55506	H2AFY2	H2A histone family, member Y2	0.173803	0.759943
3530	Binary COG subcomplex	2	1.01282	0.0507167	0.499271	10466	COG5	component of oligomeric golgi complex 5	0.00202323	2.69396
3530	Binary COG subcomplex	2	1.01282	0.0507167	0.499271	91949	COG7	component of oligomeric golgi complex 7	0.214627	-0.668315
3198	SMAD2-SKI complex	2	1.00848	0.0514882	0.499271	4087	SMAD2	SMAD family member 2	0.927187	-0.0328329
3198	SMAD2-SKI complex	2	1.00848	0.0514882	0.499271	6497	SKI	v-ski sarcoma viral oncogene homolog (avian)	0.00891692	2.04979
3729	SKI-SMAD2 hexameric complex	2	1.00848	0.0514882	0.499271	4087	SMAD2	SMAD family member 2	0.927187	-0.0328329
3729	SKI-SMAD2 hexameric complex	2	1.00848	0.0514882	0.499271	6497	SKI	v-ski sarcoma viral oncogene homolog (avian)	0.00891692	2.04979
5100	CyclinD3-CDK4-CDK6 complex	3	0.839559	0.0517142	0.499271	896	CCND3	cyclin D3	0.0610609	1.21424
5100	CyclinD3-CDK4-CDK6 complex	3	0.839559	0.0517142	0.499271	1019	CDK4	cyclin-dependent kinase 4	0.391005	0.407817
5100	CyclinD3-CDK4-CDK6 complex	3	0.839559	0.0517142	0.499271	1021	CDK6	cyclin-dependent kinase 6	0.126875	0.896623
248	BRAFT complex	11	0.461554	0.0519237	0.499271	641	BLM	Bloom syndrome, RecQ helicase-like	0.231209	0.635996
248	BRAFT complex	11	0.461554	0.0519237	0.499271	2175	FANCA	Fanconi anemia, complementation group A	0.0299133	1.52414
248	BRAFT complex	11	0.461554	0.0519237	0.499271	2176	FANCC	Fanconi anemia, complementation group C	0.000160155	3.79546
248	BRAFT complex	11	0.461554	0.0519237	0.499271	2178	FANCE	Fanconi anemia, complementation group E	0.46227	-0.335104
248	BRAFT complex	11	0.461554	0.0519237	0.499271	2188	FANCF	Fanconi anemia, complementation group F	0.109125	0.962075
248	BRAFT complex	11	0.461554	0.0519237	0.499271	2189	FANCG	Fanconi anemia, complementation group G	0.0819282	-1.08657
248	BRAFT complex	11	0.461554	0.0519237	0.499271	6117	RPA1	replication protein A1, 70kDa	0.508755	-0.293491
248	BRAFT complex	11	0.461554	0.0519237	0.499271	6118	RPA2	replication protein A2, 32kDa	0.930463	-0.0313011
248	BRAFT complex	11	0.461554	0.0519237	0.499271	6119	RPA3	replication protein A3, 14kDa	0.691569	-0.160164
248	BRAFT complex	11	0.461554	0.0519237	0.499271	7156	TOP3A	topoisomerase (DNA) III alpha	0.729368	-0.137053
248	BRAFT complex	11	0.461554	0.0519237	0.499271	55120	FANCL	Fanconi anemia, complementation group L	0.626463	0.203105
819	20S methylosome-SmD complex	4	-0.637765	0.0520584	0.499271	1207	CLNS1A	chloride channel, nucleotide-sensitive, 1A	0.214192	-0.669197
819	20S methylosome-SmD complex	4	-0.637765	0.0520584	0.499271	6632	SNRPD1	small nuclear ribonucleoprotein D1 polypeptide 16kDa	0.844264	0.0735217
819	20S methylosome-SmD complex	4	-0.637765	0.0520584	0.499271	6634	SNRPD3	small nuclear ribonucleoprotein D3 polypeptide 18kDa	0.0900493	-1.04552
819	20S methylosome-SmD complex	4	-0.637765	0.0520584	0.499271	10419	PRMT5	protein arginine methyltransferase 5	0.123065	-0.909865
5317	LATS1-HTRA2-BIRC4 complex	3	0.830438	0.0537141	0.499271	331	XIAP	X-linked inhibitor of apoptosis	0.3745	0.426548
5317	LATS1-HTRA2-BIRC4 complex	3	0.830438	0.0537141	0.499271	9113	LATS1	LATS, large tumor suppressor, homolog 1 (Drosophila)	0.203463	0.691515
5317	LATS1-HTRA2-BIRC4 complex	3	0.830438	0.0537141	0.499271	27429	HTRA2	HtrA serine peptidase 2	0.0423397	1.37325
181	26S proteasome	22	-0.246763	0.0537956	0.499271	5682	PSMA1	proteasome (prosome, macropain) subunit, alpha type, 1	0.374409	0.426654
181	26S proteasome	22	-0.246763	0.0537956	0.499271	5683	PSMA2	proteasome (prosome, macropain) subunit, alpha type, 2	0.813919	0.0894189
181	26S proteasome	22	-0.246763	0.0537956	0.499271	5684	PSMA3	proteasome (prosome, macropain) subunit, alpha type, 3	0.765871	0.115844
181	26S proteasome	22	-0.246763	0.0537956	0.499271	5685	PSMA4	proteasome (prosome, macropain) subunit, alpha type, 4	0.487328	-0.312179
181	26S proteasome	22	-0.246763	0.0537956	0.499271	5686	PSMA5	proteasome (prosome, macropain) subunit, alpha type, 5	0.83276	-0.0794804
181	26S proteasome	22	-0.246763	0.0537956	0.499271	5687	PSMA6	proteasome (prosome, macropain) subunit, alpha type, 6	0.0345441	-1.46163
181	26S proteasome	22	-0.246763	0.0537956	0.499271	5688	PSMA7	proteasome (prosome, macropain) subunit, alpha type, 7	0.10264	-0.988681
181	26S proteasome	22	-0.246763	0.0537956	0.499271	5689	PSMB1	proteasome (prosome, macropain) subunit, beta type, 1	0.723107	0.140797
181	26S proteasome	22	-0.246763	0.0537956	0.499271	5690	PSMB2	proteasome (prosome, macropain) subunit, beta type, 2	0.700051	0.15487
181	26S proteasome	22	-0.246763	0.0537956	0.499271	5691	PSMB3	proteasome (prosome, macropain) subunit, beta type, 3	0.361914	-0.441394
181	26S proteasome	22	-0.246763	0.0537956	0.499271	5692	PSMB4	proteasome (prosome, macropain) subunit, beta type, 4	0.00398043	-2.40007
181	26S proteasome	22	-0.246763	0.0537956	0.499271	5693	PSMB5	proteasome (prosome, macropain) subunit, beta type, 5	0.705177	0.151702
181	26S proteasome	22	-0.246763	0.0537956	0.499271	5694	PSMB6	proteasome (prosome, macropain) subunit, beta type, 6	0.0519086	-1.28476
181	26S proteasome	22	-0.246763	0.0537956	0.499271	5695	PSMB7	proteasome (prosome, macropain) subunit, beta type, 7	0.8255	0.0832831
181	26S proteasome	22	-0.246763	0.0537956	0.499271	5700	PSMC1	proteasome (prosome, macropain) 26S subunit, ATPase, 1	0.924375	0.0341519
181	26S proteasome	22	-0.246763	0.0537956	0.499271	5701	PSMC2	proteasome (prosome, macropain) 26S subunit, ATPase, 2	0.87877	0.0561249
181	26S proteasome	22	-0.246763	0.0537956	0.499271	5702	PSMC3	proteasome (prosome, macropain) 26S subunit, ATPase, 3	0.0456195	-1.34085
181	26S proteasome	22	-0.246763	0.0537956	0.499271	5704	PSMC4	proteasome (prosome, macropain) 26S subunit, ATPase, 4	0.671359	-0.173045
181	26S proteasome	22	-0.246763	0.0537956	0.499271	5705	PSMC5	proteasome (prosome, macropain) 26S subunit, ATPase, 5	0.273846	-0.562494
181	26S proteasome	22	-0.246763	0.0537956	0.499271	5706	PSMC6	proteasome (prosome, macropain) 26S subunit, ATPase, 6	0.0131196	1.88208
181	26S proteasome	22	-0.246763	0.0537956	0.499271	5710	PSMD4	proteasome (prosome, macropain) 26S subunit, non-ATPase, 4	0.382271	0.417629
181	26S proteasome	22	-0.246763	0.0537956	0.499271	5719	PSMD13	proteasome (prosome, macropain) 26S subunit, non-ATPase, 13	0.8645	0.0632352
5762	CRMP-MICAL-PlexinA1 complex, induced by SEMA3A	3	0.829824	0.0538509	0.499271	1400	CRMP1	collapsin response mediator protein 1	0.605542	0.217855
5762	CRMP-MICAL-PlexinA1 complex, induced by SEMA3A	3	0.829824	0.0538509	0.499271	5361	PLXNA1	plexin A1	0.157129	-0.803743
5762	CRMP-MICAL-PlexinA1 complex, induced by SEMA3A	3	0.829824	0.0538509	0.499271	64780	MICAL1	microtubule associated monoxygenase, calponin and LIM domain containing 1	0.0008407	3.07536
1614	G protein complex (MCF2, GNB1, GNG2)	3	0.828096	0.0542374	0.499271	2782	GNB1	guanine nucleotide binding protein (G protein), beta polypeptide 1	0.664541	-0.177478
1614	G protein complex (MCF2, GNB1, GNG2)	3	0.828096	0.0542374	0.499271	4168	MCF2	MCF.2 cell line derived transforming sequence	0.845463	0.0729053
1614	G protein complex (MCF2, GNB1, GNG2)	3	0.828096	0.0542374	0.499271	54331	GNG2	guanine nucleotide binding protein (G protein), gamma 2	0.00257715	2.58886
2968	Axin-SMAD3 complex	2	-0.898396	0.0551706	0.499271	4088	SMAD3	SMAD family member 3	0.127377	-0.894907
2968	Axin-SMAD3 complex	2	-0.898396	0.0551706	0.499271	8312	AXIN1	axin 1	0.125348	-0.901884
5534	PLCB1-PARD3-PARD6A complex	3	0.821892	0.0556431	0.499271	23236	PLCB1	phospholipase C, beta 1 (phosphoinositide-specific)	0.0558676	1.25284
5534	PLCB1-PARD3-PARD6A complex	3	0.821892	0.0556431	0.499271	50855	PARD6A	par-6 partitioning defective 6 homolog alpha (C. elegans)	0.0264761	1.57715
5534	PLCB1-PARD3-PARD6A complex	3	0.821892	0.0556431	0.499271	56288	PARD3	par-3 partitioning defective 3 homolog (C. elegans)	0.432206	-0.364309
1261	SRm160/300 complex	5	-0.551696	0.0563306	0.499271	6434	TRA2B	transformer 2 beta homolog (Drosophila)	0.320357	-0.494365
1261	SRm160/300 complex	5	-0.551696	0.0563306	0.499271	6625	SNRNP70	small nuclear ribonucleoprotein 70kDa (U1)	0.0354273	-1.45066
1261	SRm160/300 complex	5	-0.551696	0.0563306	0.499271	6627	SNRPA1	small nuclear ribonucleoprotein polypeptide A'	0.720653	-0.142274
1261	SRm160/300 complex	5	-0.551696	0.0563306	0.499271	10250	SRRM1	serine/arginine repetitive matrix 1	0.0137072	-1.86305
1261	SRm160/300 complex	5	-0.551696	0.0563306	0.499271	23524	SRRM2	serine/arginine repetitive matrix 2	0.0642881	1.19187
1615	G protein complex (BTK, GNG1, GNG2)	3	0.817288	0.0567047	0.499271	695	BTK	Bruton agammaglobulinemia tyrosine kinase	0.910999	0.0404819
1615	G protein complex (BTK, GNG1, GNG2)	3	0.817288	0.0567047	0.499271	2782	GNB1	guanine nucleotide binding protein (G protein), beta polypeptide 1	0.664541	-0.177478
1615	G protein complex (BTK, GNG1, GNG2)	3	0.817288	0.0567047	0.499271	54331	GNG2	guanine nucleotide binding protein (G protein), gamma 2	0.00257715	2.58886
180	PNUTS-PP1 complex	2	0.977194	0.057323	0.499271	5499	PPP1CA	protein phosphatase 1, catalytic subunit, alpha isozyme	0.0550905	1.25892
180	PNUTS-PP1 complex	2	0.977194	0.057323	0.499271	5514	PPP1R10	protein phosphatase 1, regulatory (inhibitor) subunit 10	0.20162	0.695465
2421	ITGA4-ITGB1-VCAM1 complex	3	-0.732714	0.0574117	0.499271	3676	ITGA4	integrin, alpha 4 (antigen CD49D, alpha 4 subunit of VLA-4 receptor)	0.0576718	-1.23904
2421	ITGA4-ITGB1-VCAM1 complex	3	-0.732714	0.0574117	0.499271	3688	ITGB1	integrin, beta 1 (fibronectin receptor, beta polypeptide, antigen CD29 includes MDF2, MSK12)	0.650123	-0.187004
2421	ITGA4-ITGB1-VCAM1 complex	3	-0.732714	0.0574117	0.499271	7412	VCAM1	vascular cell adhesion molecule 1	0.169005	-0.772101
2055	CASP8-CHUK-IKBKB-MALT1-BCL10 complex	5	0.639328	0.0576847	0.499271	841	CASP8	caspase 8, apoptosis-related cysteine peptidase	0.521802	0.282495
2055	CASP8-CHUK-IKBKB-MALT1-BCL10 complex	5	0.639328	0.0576847	0.499271	1147	CHUK	conserved helix-loop-helix ubiquitous kinase	0.315969	0.500355
2055	CASP8-CHUK-IKBKB-MALT1-BCL10 complex	5	0.639328	0.0576847	0.499271	3551	IKBKB	inhibitor of kappa light polypeptide gene enhancer in B-cells, kinase beta	0.252769	0.597276
2055	CASP8-CHUK-IKBKB-MALT1-BCL10 complex	5	0.639328	0.0576847	0.499271	8915	BCL10	B-cell CLL/lymphoma 10	0.85868	-0.0661688
2055	CASP8-CHUK-IKBKB-MALT1-BCL10 complex	5	0.639328	0.0576847	0.499271	10892	MALT1	mucosa associated lymphoid tissue lymphoma translocation gene 1	0.0131014	1.88268
243	RalBP1-CDC2-CCNB1 complex	3	0.812196	0.0578975	0.499271	891	CCNB1	cyclin B1	0.521435	-0.2828
243	RalBP1-CDC2-CCNB1 complex	3	0.812196	0.0578975	0.499271	983	CDK1	cyclin-dependent kinase 1	0.292855	0.533348
243	RalBP1-CDC2-CCNB1 complex	3	0.812196	0.0578975	0.499271	10928	RALBP1	ralA binding protein 1	0.00651568	2.18604
2307	AP3D1-AP3S2 complex	2	-0.88342	0.0580546	0.499271	8943	AP3D1	adaptor-related protein complex 3, delta 1 subunit	0.0252962	-1.59695
2307	AP3D1-AP3S2 complex	2	-0.88342	0.0580546	0.499271	10239	AP3S2	adaptor-related protein complex 3, sigma 2 subunit	0.676247	-0.169895
2574	CD19-Vav-PI 3-kinase (p85 subunit) complex	3	0.811343	0.0580992	0.499271	930	CD19	CD19 molecule	0.00482567	2.31644
2574	CD19-Vav-PI 3-kinase (p85 subunit) complex	3	0.811343	0.0580992	0.499271	5295	PIK3R1	phosphoinositide-3-kinase, regulatory subunit 1 (alpha)	0.837813	-0.0768529
2574	CD19-Vav-PI 3-kinase (p85 subunit) complex	3	0.811343	0.0580992	0.499271	7409	VAV1	vav 1 guanine nucleotide exchange factor	0.639088	0.19444
3847	TCL1(trimer)-AKT1 complex	2	-0.87897	0.0589342	0.499271	207	AKT1	v-akt murine thymoma viral oncogene homolog 1	0.21737	0.6628
3847	TCL1(trimer)-AKT1 complex	2	-0.87897	0.0589342	0.499271	8115	TCL1A	T-cell leukemia/lymphoma 1A	0.00379543	-2.42074
443	BP-SMAD complex	8	-0.41237	0.0596749	0.499271	571	BACH1	BTB and CNC homology 1, basic leucine zipper transcription factor 1	0.19635	-0.706969
443	BP-SMAD complex	8	-0.41237	0.0596749	0.499271	2071	ERCC3	excision repair cross-complementing rodent repair deficiency, complementation group 3 (xeroderma pigmentosum group B complementing)	0.171344	-0.766132
443	BP-SMAD complex	8	-0.41237	0.0596749	0.499271	4093	SMAD9	SMAD family member 9	0.202825	-0.692879
443	BP-SMAD complex	8	-0.41237	0.0596749	0.499271	4601	MXI1	MAX interactor 1	0.91576	-0.0382185
443	BP-SMAD complex	8	-0.41237	0.0596749	0.499271	5702	PSMC3	proteasome (prosome, macropain) 26S subunit, ATPase, 3	0.0456195	-1.34085
443	BP-SMAD complex	8	-0.41237	0.0596749	0.499271	7045	TGFBI	transforming growth factor, beta-induced, 68kDa	0.744163	0.128332
443	BP-SMAD complex	8	-0.41237	0.0596749	0.499271	7071	KLF10	Kruppel-like factor 10	0.896965	-0.0472246
443	BP-SMAD complex	8	-0.41237	0.0596749	0.499271	10804	GJB6	gap junction protein, beta 6, 30kDa	0.683948	0.164977
3151	Sulphiredoxin-peroxiredoxin complex	2	-0.873774	0.0599741	0.499271	5052	PRDX1	peroxiredoxin 1	0.152705	-0.816148
3151	Sulphiredoxin-peroxiredoxin complex	2	-0.873774	0.0599741	0.499271	140809	SRXN1	sulfiredoxin 1	0.117111	-0.931401
1005	RC complex during G2/M-phase of cell cycle	13	-0.315809	0.0606618	0.499271	142	PARP1	poly (ADP-ribose) polymerase 1	0.665407	-0.176913
1005	RC complex during G2/M-phase of cell cycle	13	-0.315809	0.0606618	0.499271	890	CCNA2	cyclin A2	0.290052	-0.537525
1005	RC complex during G2/M-phase of cell cycle	13	-0.315809	0.0606618	0.499271	891	CCNB1	cyclin B1	0.521435	-0.2828
1005	RC complex during G2/M-phase of cell cycle	13	-0.315809	0.0606618	0.499271	983	CDK1	cyclin-dependent kinase 1	0.292855	0.533348
1005	RC complex during G2/M-phase of cell cycle	13	-0.315809	0.0606618	0.499271	5422	POLA1	polymerase (DNA directed), alpha 1, catalytic subunit	0.259973	0.585071
1005	RC complex during G2/M-phase of cell cycle	13	-0.315809	0.0606618	0.499271	5424	POLD1	polymerase (DNA directed), delta 1, catalytic subunit 125kDa	0.0446883	-1.34981
1005	RC complex during G2/M-phase of cell cycle	13	-0.315809	0.0606618	0.499271	5426	POLE	polymerase (DNA directed), epsilon	0.888585	0.0513011
1005	RC complex during G2/M-phase of cell cycle	13	-0.315809	0.0606618	0.499271	5981	RFC1	replication factor C (activator 1) 1, 145kDa	0.0457917	-1.33921
1005	RC complex during G2/M-phase of cell cycle	13	-0.315809	0.0606618	0.499271	5982	RFC2	replication factor C (activator 1) 2, 40kDa	0.36538	-0.437255
1005	RC complex during G2/M-phase of cell cycle	13	-0.315809	0.0606618	0.499271	6117	RPA1	replication protein A1, 70kDa	0.508755	-0.293491
1005	RC complex during G2/M-phase of cell cycle	13	-0.315809	0.0606618	0.499271	6118	RPA2	replication protein A2, 32kDa	0.930463	-0.0313011
1005	RC complex during G2/M-phase of cell cycle	13	-0.315809	0.0606618	0.499271	6119	RPA3	replication protein A3, 14kDa	0.691569	-0.160164
1005	RC complex during G2/M-phase of cell cycle	13	-0.315809	0.0606618	0.499271	7150	TOP1	topoisomerase (DNA) I	0.215392	-0.666771
2893	BCR-ABL (p210 fusion protein)-GRB2-SOS1 complex	2	0.960168	0.0607109	0.499271	2885	GRB2	growth factor receptor-bound protein 2	0.010854	1.96441
2893	BCR-ABL (p210 fusion protein)-GRB2-SOS1 complex	2	0.960168	0.0607109	0.499271	6654	SOS1	son of sevenless homolog 1 (Drosophila)	0.903495	-0.0440745
2917	Grb2-Sos complex, Fc receptor gamma-R1 stimulated	2	0.960168	0.0607109	0.499271	2885	GRB2	growth factor receptor-bound protein 2	0.010854	1.96441
2917	Grb2-Sos complex, Fc receptor gamma-R1 stimulated	2	0.960168	0.0607109	0.499271	6654	SOS1	son of sevenless homolog 1 (Drosophila)	0.903495	-0.0440745
1471	pRb2/p130-multimolecular complex (RB2, E2F5, HDAC1, SUV39H1, P300)	5	0.628634	0.0610365	0.499271	1875	E2F5	E2F transcription factor 5, p130-binding	0.00173454	2.76082
1471	pRb2/p130-multimolecular complex (RB2, E2F5, HDAC1, SUV39H1, P300)	5	0.628634	0.0610365	0.499271	2033	EP300	E1A binding protein p300	0.587774	0.23079
1471	pRb2/p130-multimolecular complex (RB2, E2F5, HDAC1, SUV39H1, P300)	5	0.628634	0.0610365	0.499271	3065	HDAC1	histone deacetylase 1	0.729001	-0.137272
1471	pRb2/p130-multimolecular complex (RB2, E2F5, HDAC1, SUV39H1, P300)	5	0.628634	0.0610365	0.499271	5934	RBL2	retinoblastoma-like 2 (p130)	0.620281	-0.207411
1471	pRb2/p130-multimolecular complex (RB2, E2F5, HDAC1, SUV39H1, P300)	5	0.628634	0.0610365	0.499271	6839	SUV39H1	suppressor of variegation 3-9 homolog 1 (Drosophila)	0.318971	0.496248
2593	FOXO3-SIRT1 complex, oxidative stress stimulated	2	0.955453	0.0616762	0.499271	2309	FOXO3	forkhead box O3	0.0507092	1.29491
2593	FOXO3-SIRT1 complex, oxidative stress stimulated	2	0.955453	0.0616762	0.499271	23411	SIRT1	sirtuin 1	0.242108	0.615992
933	SCRIB-APC complex	2	-0.864442	0.0618781	0.499271	324	APC	adenomatous polyposis coli	0.424903	0.37171
933	SCRIB-APC complex	2	-0.864442	0.0618781	0.499271	23513	SCRIB	scribbled homolog (Drosophila)	0.00793243	-2.10059
1130	Hip1R-cortactin complex	2	-0.861805	0.0624247	0.499271	2017	CTTN	cortactin	0.00557349	-2.25387
1130	Hip1R-cortactin complex	2	-0.861805	0.0624247	0.499271	9026	HIP1R	huntingtin interacting protein 1 related	0.294942	0.530264
2601	P-TEFb-BRD4-TRAP220 complex	4	-0.599016	0.0626776	0.499271	904	CCNT1	cyclin T1	0.692218	-0.159757
2601	P-TEFb-BRD4-TRAP220 complex	4	-0.599016	0.0626776	0.499271	1025	CDK9	cyclin-dependent kinase 9	0.109377	-0.961074
2601	P-TEFb-BRD4-TRAP220 complex	4	-0.599016	0.0626776	0.499271	5469	MED1	mediator complex subunit 1	0.0914742	-1.0387
2601	P-TEFb-BRD4-TRAP220 complex	4	-0.599016	0.0626776	0.499271	23476	BRD4	bromodomain containing 4	0.580056	-0.23653
5558	PAR6-CDC42 complex	2	-0.86026	0.0627465	0.499271	998	CDC42	cell division cycle 42 (GTP binding protein, 25kDa)	0.619363	0.208055
5558	PAR6-CDC42 complex	2	-0.86026	0.0627465	0.499271	84612	PARD6B	par-6 partitioning defective 6 homolog beta (C. elegans)	0.0117876	-1.92857
2605	Heterotrimeric complex (CCNT1, CDK9, GRN)	3	-0.710674	0.0627677	0.499271	904	CCNT1	cyclin T1	0.692218	-0.159757
2605	Heterotrimeric complex (CCNT1, CDK9, GRN)	3	-0.710674	0.0627677	0.499271	1025	CDK9	cyclin-dependent kinase 9	0.109377	-0.961074
2605	Heterotrimeric complex (CCNT1, CDK9, GRN)	3	-0.710674	0.0627677	0.499271	2896	GRN	granulin	0.0974557	-1.01119
956	PAR-3-PAR-6B-PRKCI complex	3	-0.710602	0.0627859	0.499271	5584	PRKCI	protein kinase C, iota	0.690116	0.161078
956	PAR-3-PAR-6B-PRKCI complex	3	-0.710602	0.0627859	0.499271	56288	PARD3	par-3 partitioning defective 3 homolog (C. elegans)	0.432206	-0.364309
956	PAR-3-PAR-6B-PRKCI complex	3	-0.710602	0.0627859	0.499271	84612	PARD6B	par-6 partitioning defective 6 homolog beta (C. elegans)	0.0117876	-1.92857
5529	TRAF2-cIAP1/BIRC2 complex	2	0.949922	0.0628237	0.499271	329	BIRC2	baculoviral IAP repeat containing 2	0.0101503	1.99352
5529	TRAF2-cIAP1/BIRC2 complex	2	0.949922	0.0628237	0.499271	7186	TRAF2	TNF receptor-associated factor 2	0.805976	-0.0936781
1083	P-TEFb.4 complex	2	-0.85874	0.0630645	0.499271	1025	CDK9	cyclin-dependent kinase 9	0.109377	-0.961074
1083	P-TEFb.4 complex	2	-0.85874	0.0630645	0.499271	8812	CCNK	cyclin K	0.175224	-0.756406
5419	HTR1A-GPR26 complex	2	-0.857757	0.0632707	0.499271	2849	GPR26	G protein-coupled receptor 26	0.0314216	-1.50277
5419	HTR1A-GPR26 complex	2	-0.857757	0.0632707	0.499271	3350	HTR1A	5-hydroxytryptamine (serotonin) receptor 1A	0.612713	-0.212743
705	SNARE complex (RINT1, ZW10, p31)	3	0.786173	0.0643034	0.499271	5714	PSMD8	proteasome (prosome, macropain) 26S subunit, non-ATPase, 8	0.575988	-0.239587
705	SNARE complex (RINT1, ZW10, p31)	3	0.786173	0.0643034	0.499271	9183	ZW10	ZW10, kinetochore associated, homolog (Drosophila)	0.287755	0.540977
705	SNARE complex (RINT1, ZW10, p31)	3	0.786173	0.0643034	0.499271	60561	RINT1	RAD50 interactor 1	0.00876742	2.05713
178	Respiratory chain complex I (holoenzyme), mitochondrial	38	0.248555	0.0650932	0.499271	4694	NDUFA1	NADH dehydrogenase (ubiquinone) 1 alpha subcomplex, 1, 7.5kDa	0.838393	0.0765526
178	Respiratory chain complex I (holoenzyme), mitochondrial	38	0.248555	0.0650932	0.499271	4695	NDUFA2	NADH dehydrogenase (ubiquinone) 1 alpha subcomplex, 2, 8kDa	0.418513	0.378291
178	Respiratory chain complex I (holoenzyme), mitochondrial	38	0.248555	0.0650932	0.499271	4696	NDUFA3	NADH dehydrogenase (ubiquinone) 1 alpha subcomplex, 3, 9kDa	0.0844556	-1.07337
178	Respiratory chain complex I (holoenzyme), mitochondrial	38	0.248555	0.0650932	0.499271	4697	NDUFA4	NADH dehydrogenase (ubiquinone) 1 alpha subcomplex, 4, 9kDa	0.0486849	1.31261
178	Respiratory chain complex I (holoenzyme), mitochondrial	38	0.248555	0.0650932	0.499271	4698	NDUFA5	NADH dehydrogenase (ubiquinone) 1 alpha subcomplex, 5, 13kDa	0.00448733	2.34801
178	Respiratory chain complex I (holoenzyme), mitochondrial	38	0.248555	0.0650932	0.499271	4700	NDUFA6	NADH dehydrogenase (ubiquinone) 1 alpha subcomplex, 6, 14kDa	0.265474	0.575978
178	Respiratory chain complex I (holoenzyme), mitochondrial	38	0.248555	0.0650932	0.499271	4701	NDUFA7	NADH dehydrogenase (ubiquinone) 1 alpha subcomplex, 7, 14.5kDa	0.0738955	-1.13138
178	Respiratory chain complex I (holoenzyme), mitochondrial	38	0.248555	0.0650932	0.499271	4702	NDUFA8	NADH dehydrogenase (ubiquinone) 1 alpha subcomplex, 8, 19kDa	0.472758	0.325361
178	Respiratory chain complex I (holoenzyme), mitochondrial	38	0.248555	0.0650932	0.499271	4704	NDUFA9	NADH dehydrogenase (ubiquinone) 1 alpha subcomplex, 9, 39kDa	0.166711	0.778035
178	Respiratory chain complex I (holoenzyme), mitochondrial	38	0.248555	0.0650932	0.499271	4705	NDUFA10	NADH dehydrogenase (ubiquinone) 1 alpha subcomplex, 10, 42kDa	0.112339	0.949468
178	Respiratory chain complex I (holoenzyme), mitochondrial	38	0.248555	0.0650932	0.499271	4706	NDUFAB1	NADH dehydrogenase (ubiquinone) 1, alpha/beta subcomplex, 1, 8kDa	0.0765061	1.1163
178	Respiratory chain complex I (holoenzyme), mitochondrial	38	0.248555	0.0650932	0.499271	4707	NDUFB1	NADH dehydrogenase (ubiquinone) 1 beta subcomplex, 1, 7kDa	0.113399	0.94539
178	Respiratory chain complex I (holoenzyme), mitochondrial	38	0.248555	0.0650932	0.499271	4708	NDUFB2	NADH dehydrogenase (ubiquinone) 1 beta subcomplex, 2, 8kDa	0.162492	-0.789169
178	Respiratory chain complex I (holoenzyme), mitochondrial	38	0.248555	0.0650932	0.499271	4709	NDUFB3	NADH dehydrogenase (ubiquinone) 1 beta subcomplex, 3, 12kDa	0.0015268	2.81622
178	Respiratory chain complex I (holoenzyme), mitochondrial	38	0.248555	0.0650932	0.499271	4710	NDUFB4	NADH dehydrogenase (ubiquinone) 1 beta subcomplex, 4, 15kDa	0.544059	0.264354
178	Respiratory chain complex I (holoenzyme), mitochondrial	38	0.248555	0.0650932	0.499271	4711	NDUFB5	NADH dehydrogenase (ubiquinone) 1 beta subcomplex, 5, 16kDa	0.208778	0.680316
178	Respiratory chain complex I (holoenzyme), mitochondrial	38	0.248555	0.0650932	0.499271	4712	NDUFB6	NADH dehydrogenase (ubiquinone) 1 beta subcomplex, 6, 17kDa	0.223077	0.651546
178	Respiratory chain complex I (holoenzyme), mitochondrial	38	0.248555	0.0650932	0.499271	4713	NDUFB7	NADH dehydrogenase (ubiquinone) 1 beta subcomplex, 7, 18kDa	0.461658	-0.335679
178	Respiratory chain complex I (holoenzyme), mitochondrial	38	0.248555	0.0650932	0.499271	4714	NDUFB8	NADH dehydrogenase (ubiquinone) 1 beta subcomplex, 8, 19kDa	0.242611	-0.61509
178	Respiratory chain complex I (holoenzyme), mitochondrial	38	0.248555	0.0650932	0.499271	4715	NDUFB9	NADH dehydrogenase (ubiquinone) 1 beta subcomplex, 9, 22kDa	0.75709	-0.120852
178	Respiratory chain complex I (holoenzyme), mitochondrial	38	0.248555	0.0650932	0.499271	4716	NDUFB10	NADH dehydrogenase (ubiquinone) 1 beta subcomplex, 10, 22kDa	0.0907429	-1.04219
178	Respiratory chain complex I (holoenzyme), mitochondrial	38	0.248555	0.0650932	0.499271	4717	NDUFC1	NADH dehydrogenase (ubiquinone) 1, subcomplex unknown, 1, 6kDa	0.206422	-0.685244
178	Respiratory chain complex I (holoenzyme), mitochondrial	38	0.248555	0.0650932	0.499271	4718	NDUFC2	NADH dehydrogenase (ubiquinone) 1, subcomplex unknown, 2, 14.5kDa	0.799124	0.0973858
178	Respiratory chain complex I (holoenzyme), mitochondrial	38	0.248555	0.0650932	0.499271	4719	NDUFS1	NADH dehydrogenase (ubiquinone) Fe-S protein 1, 75kDa (NADH-coenzyme Q reductase)	0.133055	0.875967
178	Respiratory chain complex I (holoenzyme), mitochondrial	38	0.248555	0.0650932	0.499271	4720	NDUFS2	NADH dehydrogenase (ubiquinone) Fe-S protein 2, 49kDa (NADH-coenzyme Q reductase)	0.665449	-0.176885
178	Respiratory chain complex I (holoenzyme), mitochondrial	38	0.248555	0.0650932	0.499271	4722	NDUFS3	NADH dehydrogenase (ubiquinone) Fe-S protein 3, 30kDa (NADH-coenzyme Q reductase)	0.713659	0.146509
178	Respiratory chain complex I (holoenzyme), mitochondrial	38	0.248555	0.0650932	0.499271	4723	NDUFV1	NADH dehydrogenase (ubiquinone) flavoprotein 1, 51kDa	0.367592	0.434635
178	Respiratory chain complex I (holoenzyme), mitochondrial	38	0.248555	0.0650932	0.499271	4724	NDUFS4	NADH dehydrogenase (ubiquinone) Fe-S protein 4, 18kDa (NADH-coenzyme Q reductase)	0.318318	0.497139
178	Respiratory chain complex I (holoenzyme), mitochondrial	38	0.248555	0.0650932	0.499271	4725	NDUFS5	NADH dehydrogenase (ubiquinone) Fe-S protein 5, 15kDa (NADH-coenzyme Q reductase)	0.962961	0.0163913
178	Respiratory chain complex I (holoenzyme), mitochondrial	38	0.248555	0.0650932	0.499271	4726	NDUFS6	NADH dehydrogenase (ubiquinone) Fe-S protein 6, 13kDa (NADH-coenzyme Q reductase)	0.84477	0.0732613
178	Respiratory chain complex I (holoenzyme), mitochondrial	38	0.248555	0.0650932	0.499271	4728	NDUFS8	NADH dehydrogenase (ubiquinone) Fe-S protein 8, 23kDa (NADH-coenzyme Q reductase)	0.0225862	-1.64616
178	Respiratory chain complex I (holoenzyme), mitochondrial	38	0.248555	0.0650932	0.499271	4729	NDUFV2	NADH dehydrogenase (ubiquinone) flavoprotein 2, 24kDa	0.0984415	1.00682
178	Respiratory chain complex I (holoenzyme), mitochondrial	38	0.248555	0.0650932	0.499271	4731	NDUFV3	NADH dehydrogenase (ubiquinone) flavoprotein 3, 10kDa	0.890865	0.0501882
178	Respiratory chain complex I (holoenzyme), mitochondrial	38	0.248555	0.0650932	0.499271	51079	NDUFA13	NADH dehydrogenase (ubiquinone) 1 alpha subcomplex, 13	0.343895	-0.463574
178	Respiratory chain complex I (holoenzyme), mitochondrial	38	0.248555	0.0650932	0.499271	54539	NDUFB11	NADH dehydrogenase (ubiquinone) 1 beta subcomplex, 11, 17.3kDa	0.469237	-0.328608
178	Respiratory chain complex I (holoenzyme), mitochondrial	38	0.248555	0.0650932	0.499271	55967	NDUFA12	NADH dehydrogenase (ubiquinone) 1 alpha subcomplex, 12	0.0317403	1.49839
178	Respiratory chain complex I (holoenzyme), mitochondrial	38	0.248555	0.0650932	0.499271	126328	NDUFA11	NADH dehydrogenase (ubiquinone) 1 alpha subcomplex, 11, 14.7kDa	0.613379	0.212271
178	Respiratory chain complex I (holoenzyme), mitochondrial	38	0.248555	0.0650932	0.499271	374291	NDUFS7	NADH dehydrogenase (ubiquinone) Fe-S protein 7, 20kDa (NADH-coenzyme Q reductase)	0.531987	-0.274099
5277	HIF1A-OS9-EGLN3 complex	3	0.783009	0.0651184	0.499271	3091	HIF1A	hypoxia inducible factor 1, alpha subunit (basic helix-loop-helix transcription factor)	0.520382	-0.283678
5277	HIF1A-OS9-EGLN3 complex	3	0.783009	0.0651184	0.499271	10956	OS9	osteosarcoma amplified 9, endoplasmic reticulum lectin	0.280208	0.552519
5277	HIF1A-OS9-EGLN3 complex	3	0.783009	0.0651184	0.499271	112399	EGLN3	egl nine homolog 3 (C. elegans)	0.00831407	2.08019
288	ARC complex	15	-0.278037	0.0652066	0.499271	892	CCNC	cyclin C	0.244027	0.612563
288	ARC complex	15	-0.278037	0.0652066	0.499271	1024	CDK8	cyclin-dependent kinase 8	0.624651	-0.204363
288	ARC complex	15	-0.278037	0.0652066	0.499271	5469	MED1	mediator complex subunit 1	0.0914742	-1.0387
288	ARC complex	15	-0.278037	0.0652066	0.499271	9282	MED14	mediator complex subunit 14	0.961751	0.0169375
288	ARC complex	15	-0.278037	0.0652066	0.499271	9412	MED21	mediator complex subunit 21	0.329244	0.482482
288	ARC complex	15	-0.278037	0.0652066	0.499271	9439	MED23	mediator complex subunit 23	0.3559	0.448672
288	ARC complex	15	-0.278037	0.0652066	0.499271	9440	MED17	mediator complex subunit 17	0.430739	-0.365786
288	ARC complex	15	-0.278037	0.0652066	0.499271	9441	MED26	mediator complex subunit 26	0.105132	-0.978266
288	ARC complex	15	-0.278037	0.0652066	0.499271	9443	MED7	mediator complex subunit 7	0.144289	0.840767
288	ARC complex	15	-0.278037	0.0652066	0.499271	9862	MED24	mediator complex subunit 24	0.0126048	-1.89946
288	ARC complex	15	-0.278037	0.0652066	0.499271	9968	MED12	mediator complex subunit 12	0.0388398	-1.41072
288	ARC complex	15	-0.278037	0.0652066	0.499271	9969	MED13	mediator complex subunit 13	0.939773	0.0269768
288	ARC complex	15	-0.278037	0.0652066	0.499271	10001	MED6	mediator complex subunit 6	0.104669	-0.980181
288	ARC complex	15	-0.278037	0.0652066	0.499271	51586	MED15	mediator complex subunit 15	0.898729	-0.0463713
288	ARC complex	15	-0.278037	0.0652066	0.499271	81857	MED25	mediator complex subunit 25	0.473261	0.3249
2511	CRKL-WIPF1-WAS complex	3	-0.699594	0.0656036	0.499271	1399	CRKL	v-crk sarcoma virus CT10 oncogene homolog (avian)-like	0.0841466	-1.07496
2511	CRKL-WIPF1-WAS complex	3	-0.699594	0.0656036	0.499271	7454	WAS	Wiskott-Aldrich syndrome (eczema-thrombocytopenia)	0.121028	-0.917116
2511	CRKL-WIPF1-WAS complex	3	-0.699594	0.0656036	0.499271	7456	WIPF1	WAS/WASL interacting protein family, member 1	0.782161	-0.106704
2129	DNAJB2-HSPA8-PSMA3 complex	3	-0.698011	0.0660168	0.499271	3300	DNAJB2	DnaJ (Hsp40) homolog, subfamily B, member 2	0.0781774	-1.10692
2129	DNAJB2-HSPA8-PSMA3 complex	3	-0.698011	0.0660168	0.499271	3312	HSPA8	heat shock 70kDa protein 8	0.0788937	-1.10296
2129	DNAJB2-HSPA8-PSMA3 complex	3	-0.698011	0.0660168	0.499271	5684	PSMA3	proteasome (prosome, macropain) subunit, alpha type, 3	0.765871	0.115844
2529	LAT-PLC-gamma-1-p85-GRB2-CBL-VAV-SLP-76 signaling complex, C305 activated	7	0.521078	0.0662821	0.499271	867	CBL	Cas-Br-M (murine) ecotropic retroviral transforming sequence	0.0406959	1.39045
2529	LAT-PLC-gamma-1-p85-GRB2-CBL-VAV-SLP-76 signaling complex, C305 activated	7	0.521078	0.0662821	0.499271	2885	GRB2	growth factor receptor-bound protein 2	0.010854	1.96441
2529	LAT-PLC-gamma-1-p85-GRB2-CBL-VAV-SLP-76 signaling complex, C305 activated	7	0.521078	0.0662821	0.499271	3937	LCP2	lymphocyte cytosolic protein 2 (SH2 domain containing leukocyte protein of 76kDa)	0.123834	0.907161
2529	LAT-PLC-gamma-1-p85-GRB2-CBL-VAV-SLP-76 signaling complex, C305 activated	7	0.521078	0.0662821	0.499271	5295	PIK3R1	phosphoinositide-3-kinase, regulatory subunit 1 (alpha)	0.837813	-0.0768529
2529	LAT-PLC-gamma-1-p85-GRB2-CBL-VAV-SLP-76 signaling complex, C305 activated	7	0.521078	0.0662821	0.499271	5335	PLCG1	phospholipase C, gamma 1	0.1113	0.953506
2529	LAT-PLC-gamma-1-p85-GRB2-CBL-VAV-SLP-76 signaling complex, C305 activated	7	0.521078	0.0662821	0.499271	7409	VAV1	vav 1 guanine nucleotide exchange factor	0.639088	0.19444
2529	LAT-PLC-gamma-1-p85-GRB2-CBL-VAV-SLP-76 signaling complex, C305 activated	7	0.521078	0.0662821	0.499271	27040	LAT	linker for activation of T cells	0.0206269	-1.68557
301	SMCC complex	17	-0.260765	0.0668675	0.499271	892	CCNC	cyclin C	0.244027	0.612563
301	SMCC complex	17	-0.260765	0.0668675	0.499271	1024	CDK8	cyclin-dependent kinase 8	0.624651	-0.204363
301	SMCC complex	17	-0.260765	0.0668675	0.499271	5469	MED1	mediator complex subunit 1	0.0914742	-1.0387
301	SMCC complex	17	-0.260765	0.0668675	0.499271	9282	MED14	mediator complex subunit 14	0.961751	0.0169375
301	SMCC complex	17	-0.260765	0.0668675	0.499271	9412	MED21	mediator complex subunit 21	0.329244	0.482482
301	SMCC complex	17	-0.260765	0.0668675	0.499271	9440	MED17	mediator complex subunit 17	0.430739	-0.365786
301	SMCC complex	17	-0.260765	0.0668675	0.499271	9442	MED27	mediator complex subunit 27	0.0643513	-1.19144
301	SMCC complex	17	-0.260765	0.0668675	0.499271	9443	MED7	mediator complex subunit 7	0.144289	0.840767
301	SMCC complex	17	-0.260765	0.0668675	0.499271	9477	MED20	mediator complex subunit 20	0.125177	0.902474
301	SMCC complex	17	-0.260765	0.0668675	0.499271	9862	MED24	mediator complex subunit 24	0.0126048	-1.89946
301	SMCC complex	17	-0.260765	0.0668675	0.499271	9967	THRAP3	thyroid hormone receptor associated protein 3	0.769626	0.11372
301	SMCC complex	17	-0.260765	0.0668675	0.499271	9968	MED12	mediator complex subunit 12	0.0388398	-1.41072
301	SMCC complex	17	-0.260765	0.0668675	0.499271	9969	MED13	mediator complex subunit 13	0.939773	0.0269768
301	SMCC complex	17	-0.260765	0.0668675	0.499271	10001	MED6	mediator complex subunit 6	0.104669	-0.980181
301	SMCC complex	17	-0.260765	0.0668675	0.499271	10025	MED16	mediator complex subunit 16	0.319031	-0.496168
301	SMCC complex	17	-0.260765	0.0668675	0.499271	51003	MED31	mediator complex subunit 31	0.998027	0.000857605
301	SMCC complex	17	-0.260765	0.0668675	0.499271	84246	MED10	mediator complex subunit 10	0.696566	0.157038
2254	CTGF/Hcs24-actin complex	2	-0.83655	0.0678508	0.499271	71	ACTG1	actin, gamma 1	0.88442	0.0533412
2254	CTGF/Hcs24-actin complex	2	-0.83655	0.0678508	0.499271	1490	CTGF	connective tissue growth factor	0.0187741	-1.72644
292	MutL-alpha complex	2	0.921606	0.0689616	0.499271	4292	MLH1	mutL homolog 1, colon cancer, nonpolyposis type 2 (E. coli)	0.940004	0.0268705
292	MutL-alpha complex	2	0.921606	0.0689616	0.499271	5395	PMS2	PMS2 postmeiotic segregation increased 2 (S. cerevisiae)	0.0152637	1.81634
379	MutL-alpha complex	2	0.921606	0.0689616	0.499271	4292	MLH1	mutL homolog 1, colon cancer, nonpolyposis type 2 (E. coli)	0.940004	0.0268705
379	MutL-alpha complex	2	0.921606	0.0689616	0.499271	5395	PMS2	PMS2 postmeiotic segregation increased 2 (S. cerevisiae)	0.0152637	1.81634
2084	NFKB1-NFKB2-REL-RELA-RELB complex	5	-0.512548	0.0691104	0.499271	4790	NFKB1	nuclear factor of kappa light polypeptide gene enhancer in B-cells 1	0.632905	-0.198661
2084	NFKB1-NFKB2-REL-RELA-RELB complex	5	-0.512548	0.0691104	0.499271	4791	NFKB2	nuclear factor of kappa light polypeptide gene enhancer in B-cells 2 (p49/p100)	0.0254954	-1.59354
2084	NFKB1-NFKB2-REL-RELA-RELB complex	5	-0.512548	0.0691104	0.499271	5966	REL	v-rel reticuloendotheliosis viral oncogene homolog (avian)	0.438354	0.358175
2084	NFKB1-NFKB2-REL-RELA-RELB complex	5	-0.512548	0.0691104	0.499271	5970	RELA	v-rel reticuloendotheliosis viral oncogene homolog A (avian)	0.613346	-0.212295
2084	NFKB1-NFKB2-REL-RELA-RELB complex	5	-0.512548	0.0691104	0.499271	5971	RELB	v-rel reticuloendotheliosis viral oncogene homolog B	0.121221	-0.916421
909	ARC92-Mediator complex	13	-0.2971	0.0708743	0.499271	1024	CDK8	cyclin-dependent kinase 8	0.624651	-0.204363
909	ARC92-Mediator complex	13	-0.2971	0.0708743	0.499271	5469	MED1	mediator complex subunit 1	0.0914742	-1.0387
909	ARC92-Mediator complex	13	-0.2971	0.0708743	0.499271	9282	MED14	mediator complex subunit 14	0.961751	0.0169375
909	ARC92-Mediator complex	13	-0.2971	0.0708743	0.499271	9439	MED23	mediator complex subunit 23	0.3559	0.448672
909	ARC92-Mediator complex	13	-0.2971	0.0708743	0.499271	9440	MED17	mediator complex subunit 17	0.430739	-0.365786
909	ARC92-Mediator complex	13	-0.2971	0.0708743	0.499271	9441	MED26	mediator complex subunit 26	0.105132	-0.978266
909	ARC92-Mediator complex	13	-0.2971	0.0708743	0.499271	9443	MED7	mediator complex subunit 7	0.144289	0.840767
909	ARC92-Mediator complex	13	-0.2971	0.0708743	0.499271	9968	MED12	mediator complex subunit 12	0.0388398	-1.41072
909	ARC92-Mediator complex	13	-0.2971	0.0708743	0.499271	9969	MED13	mediator complex subunit 13	0.939773	0.0269768
909	ARC92-Mediator complex	13	-0.2971	0.0708743	0.499271	10001	MED6	mediator complex subunit 6	0.104669	-0.980181
909	ARC92-Mediator complex	13	-0.2971	0.0708743	0.499271	10025	MED16	mediator complex subunit 16	0.319031	-0.496168
909	ARC92-Mediator complex	13	-0.2971	0.0708743	0.499271	51586	MED15	mediator complex subunit 15	0.898729	-0.0463713
909	ARC92-Mediator complex	13	-0.2971	0.0708743	0.499271	81857	MED25	mediator complex subunit 25	0.473261	0.3249
1352	ING4 complex (ING4, MYST2, C1orf149, PHF17)	4	-0.570459	0.071531	0.499271	11143	MYST2	MYST histone acetyltransferase 2	0.34105	-0.467182
1352	ING4 complex (ING4, MYST2, C1orf149, PHF17)	4	-0.570459	0.071531	0.499271	51147	ING4	inhibitor of growth family, member 4	0.662075	0.179093
1352	ING4 complex (ING4, MYST2, C1orf149, PHF17)	4	-0.570459	0.071531	0.499271	64769	MEAF6	MYST/Esa1-associated factor 6	0.433303	-0.363209
1352	ING4 complex (ING4, MYST2, C1orf149, PHF17)	4	-0.570459	0.071531	0.499271	79960	PHF17	PHD finger protein 17	0.0234133	-1.63054
886	MTA1 complex	6	-0.454503	0.071827	0.499271	3065	HDAC1	histone deacetylase 1	0.729001	-0.137272
886	MTA1 complex	6	-0.454503	0.071827	0.499271	3066	HDAC2	histone deacetylase 2	0.510678	-0.291853
886	MTA1 complex	6	-0.454503	0.071827	0.499271	5928	RBBP4	retinoblastoma binding protein 4	0.213744	-0.670107
886	MTA1 complex	6	-0.454503	0.071827	0.499271	5931	RBBP7	retinoblastoma binding protein 7	0.455238	-0.341761
886	MTA1 complex	6	-0.454503	0.071827	0.499271	9112	MTA1	metastasis associated 1	0.260277	-0.584563
886	MTA1 complex	6	-0.454503	0.071827	0.499271	53615	MBD3	methyl-CpG binding domain protein 3	0.198855	-0.701462
2053	BCL10-MALT1 complex	2	0.908257	0.0720108	0.499271	8915	BCL10	B-cell CLL/lymphoma 10	0.85868	-0.0661688
2053	BCL10-MALT1 complex	2	0.908257	0.0720108	0.499271	10892	MALT1	mucosa associated lymphoid tissue lymphoma translocation gene 1	0.0131014	1.88268
2572	RAB5-EEA1 complex	2	0.906276	0.0724718	0.499271	5868	RAB5A	RAB5A, member RAS oncogene family	0.413837	0.38317
2572	RAB5-EEA1 complex	2	0.906276	0.0724718	0.499271	8411	EEA1	early endosome antigen 1	0.0372064	1.42938
252	RAD51C-XRCC3 complex	2	0.904739	0.0728313	0.499271	5889	RAD51C	RAD51 homolog C (S. cerevisiae)	0.0552773	1.25745
252	RAD51C-XRCC3 complex	2	0.904739	0.0728313	0.499271	7517	XRCC3	X-ray repair complementing defective repair in Chinese hamster cells 3	0.280527	0.552025
253	RAD51C-XRCC3 complex	2	0.904739	0.0728313	0.499271	5889	RAD51C	RAD51 homolog C (S. cerevisiae)	0.0552773	1.25745
253	RAD51C-XRCC3 complex	2	0.904739	0.0728313	0.499271	7517	XRCC3	X-ray repair complementing defective repair in Chinese hamster cells 3	0.280527	0.552025
259	RAD51C-XRCC3 complex	2	0.904739	0.0728313	0.499271	5889	RAD51C	RAD51 homolog C (S. cerevisiae)	0.0552773	1.25745
259	RAD51C-XRCC3 complex	2	0.904739	0.0728313	0.499271	7517	XRCC3	X-ray repair complementing defective repair in Chinese hamster cells 3	0.280527	0.552025
1196	RAD51C-XRCC3 complex	2	0.904739	0.0728313	0.499271	5889	RAD51C	RAD51 homolog C (S. cerevisiae)	0.0552773	1.25745
1196	RAD51C-XRCC3 complex	2	0.904739	0.0728313	0.499271	7517	XRCC3	X-ray repair complementing defective repair in Chinese hamster cells 3	0.280527	0.552025
1874	SNARE complex (SNAP25, VAMP3, VAMP2, NAPB, STX13)	5	0.593317	0.0731947	0.499271	6616	SNAP25	synaptosomal-associated protein, 25kDa	0.306224	0.513961
1874	SNARE complex (SNAP25, VAMP3, VAMP2, NAPB, STX13)	5	0.593317	0.0731947	0.499271	6844	VAMP2	vesicle-associated membrane protein 2 (synaptobrevin 2)	0.825273	0.0834023
1874	SNARE complex (SNAP25, VAMP3, VAMP2, NAPB, STX13)	5	0.593317	0.0731947	0.499271	9341	VAMP3	vesicle-associated membrane protein 3 (cellubrevin)	0.00502758	2.29864
1874	SNARE complex (SNAP25, VAMP3, VAMP2, NAPB, STX13)	5	0.593317	0.0731947	0.499271	23673	STX12	syntaxin 12	0.926132	0.033327
1874	SNARE complex (SNAP25, VAMP3, VAMP2, NAPB, STX13)	5	0.593317	0.0731947	0.499271	63908	NAPB	N-ethylmaleimide-sensitive factor attachment protein, beta	0.917793	0.0372554
2419	ITGA4-ITGB1-CD81 complex	3	-0.671643	0.0731985	0.499271	975	CD81	CD81 molecule	0.257698	-0.588889
2419	ITGA4-ITGB1-CD81 complex	3	-0.671643	0.0731985	0.499271	3676	ITGA4	integrin, alpha 4 (antigen CD49D, alpha 4 subunit of VLA-4 receptor)	0.0576718	-1.23904
2419	ITGA4-ITGB1-CD81 complex	3	-0.671643	0.0731985	0.499271	3688	ITGB1	integrin, beta 1 (fibronectin receptor, beta polypeptide, antigen CD29 includes MDF2, MSK12)	0.650123	-0.187004
879	PRKAC-AKAP5-ADRB1 complex	4	0.649396	0.0737243	0.499271	153	ADRB1	adrenergic, beta-1-, receptor	0.876603	-0.0571972
879	PRKAC-AKAP5-ADRB1 complex	4	0.649396	0.0737243	0.499271	5567	PRKACB	protein kinase, cAMP-dependent, catalytic, beta	0.00835047	2.07829
879	PRKAC-AKAP5-ADRB1 complex	4	0.649396	0.0737243	0.499271	5568	PRKACG	protein kinase, cAMP-dependent, catalytic, gamma	0.658879	-0.181194
879	PRKAC-AKAP5-ADRB1 complex	4	0.649396	0.0737243	0.499271	9495	AKAP5	A kinase (PRKA) anchor protein 5	0.174708	0.757688
2923	SHARP-CtBP1-CtIP complex	3	0.751175	0.0737706	0.499271	1487	CTBP1	C-terminal binding protein 1	0.00447078	2.34962
2923	SHARP-CtBP1-CtIP complex	3	0.751175	0.0737706	0.499271	5932	RBBP8	retinoblastoma binding protein 8	0.600887	-0.221208
2923	SHARP-CtBP1-CtIP complex	3	0.751175	0.0737706	0.499271	23013	SPEN	spen homolog, transcriptional regulator (Drosophila)	0.749692	0.125117
2352	ITGAV-ITGB6-SPP1 complex	3	0.750871	0.0738573	0.499271	3685	ITGAV	integrin, alpha V (vitronectin receptor, alpha polypeptide, antigen CD51)	0.0812439	1.09021
2352	ITGAV-ITGB6-SPP1 complex	3	0.750871	0.0738573	0.499271	3694	ITGB6	integrin, beta 6	0.322856	0.490991
2352	ITGAV-ITGB6-SPP1 complex	3	0.750871	0.0738573	0.499271	6696	SPP1	secreted phosphoprotein 1	0.213101	0.671414
2944	Notch1-p56lck-PI3K complex	3	-0.667709	0.0743195	0.499271	3932	LCK	lymphocyte-specific protein tyrosine kinase	0.138963	-0.857102
2944	Notch1-p56lck-PI3K complex	3	-0.667709	0.0743195	0.499271	4851	NOTCH1	notch 1	0.0852762	-1.06917
2944	Notch1-p56lck-PI3K complex	3	-0.667709	0.0743195	0.499271	5295	PIK3R1	phosphoinositide-3-kinase, regulatory subunit 1 (alpha)	0.837813	-0.0768529
5736	Pre-initiation complex (PIC)	3	-0.667573	0.0743586	0.499271	60	ACTB	actin, beta	0.401882	-0.395901
5736	Pre-initiation complex (PIC)	3	-0.667573	0.0743586	0.499271	5430	POLR2A	polymerase (RNA) II (DNA directed) polypeptide A, 220kDa	0.0666343	-1.1763
5736	Pre-initiation complex (PIC)	3	-0.667573	0.0743586	0.499271	6908	TBP	TATA box binding protein	0.371095	-0.430514
650	HDAC2-asscociated core complex	7	-0.405299	0.0743662	0.499271	1107	CHD3	chromodomain helicase DNA binding protein 3	0.895339	-0.0480127
650	HDAC2-asscociated core complex	7	-0.405299	0.0743662	0.499271	3066	HDAC2	histone deacetylase 2	0.510678	-0.291853
650	HDAC2-asscociated core complex	7	-0.405299	0.0743662	0.499271	5928	RBBP4	retinoblastoma binding protein 4	0.213744	-0.670107
650	HDAC2-asscociated core complex	7	-0.405299	0.0743662	0.499271	5931	RBBP7	retinoblastoma binding protein 7	0.455238	-0.341761
650	HDAC2-asscociated core complex	7	-0.405299	0.0743662	0.499271	9219	MTA2	metastasis associated 1 family, member 2	0.596887	-0.224108
650	HDAC2-asscociated core complex	7	-0.405299	0.0743662	0.499271	53615	MBD3	methyl-CpG binding domain protein 3	0.198855	-0.701462
650	HDAC2-asscociated core complex	7	-0.405299	0.0743662	0.499271	57459	GATAD2B	GATA zinc finger domain containing 2B	0.275555	-0.559791
3740	SKI-SMAD3-SMAD4 pentameric complex	3	0.747321	0.0748752	0.499271	4088	SMAD3	SMAD family member 3	0.127377	-0.894907
3740	SKI-SMAD3-SMAD4 pentameric complex	3	0.747321	0.0748752	0.499271	4089	SMAD4	SMAD family member 4	0.0818302	1.08709
3740	SKI-SMAD3-SMAD4 pentameric complex	3	0.747321	0.0748752	0.499271	6497	SKI	v-ski sarcoma viral oncogene homolog (avian)	0.00891692	2.04979
3959	SMAD3-SMAD4-cSKI, TGF(beta)-dependent	3	0.747321	0.0748752	0.499271	4088	SMAD3	SMAD family member 3	0.127377	-0.894907
3959	SMAD3-SMAD4-cSKI, TGF(beta)-dependent	3	0.747321	0.0748752	0.499271	4089	SMAD4	SMAD family member 4	0.0818302	1.08709
3959	SMAD3-SMAD4-cSKI, TGF(beta)-dependent	3	0.747321	0.0748752	0.499271	6497	SKI	v-ski sarcoma viral oncogene homolog (avian)	0.00891692	2.04979
5531	Tumor necrosis factor receptor 1 signaling complex	4	0.645712	0.0749614	0.499271	329	BIRC2	baculoviral IAP repeat containing 2	0.0101503	1.99352
5531	Tumor necrosis factor receptor 1 signaling complex	4	0.645712	0.0749614	0.499271	7132	TNFRSF1A	tumor necrosis factor receptor superfamily, member 1A	0.903089	-0.0442695
5531	Tumor necrosis factor receptor 1 signaling complex	4	0.645712	0.0749614	0.499271	7186	TRAF2	TNF receptor-associated factor 2	0.805976	-0.0936781
5531	Tumor necrosis factor receptor 1 signaling complex	4	0.645712	0.0749614	0.499271	8717	TRADD	TNFRSF1A-associated via death domain	0.187382	0.727273
2749	SETDB1-containing HMTase complex	2	-0.804881	0.0751611	0.499271	9869	SETDB1	SET domain, bifurcated 1	0.0940451	-1.02666
2749	SETDB1-containing HMTase complex	2	-0.804881	0.0751611	0.499271	55729	ATF7IP	activating transcription factor 7 interacting protein	0.261157	-0.583098
2744	TRAF2-MALT1 complex	2	0.894502	0.0752598	0.499271	7186	TRAF2	TNF receptor-associated factor 2	0.805976	-0.0936781
2744	TRAF2-MALT1 complex	2	0.894502	0.0752598	0.499271	10892	MALT1	mucosa associated lymphoid tissue lymphoma translocation gene 1	0.0131014	1.88268
313	Cell cycle kinase complex CDK5	5	0.587073	0.0755252	0.499271	595	CCND1	cyclin D1	0.805735	-0.093808
313	Cell cycle kinase complex CDK5	5	0.587073	0.0755252	0.499271	896	CCND3	cyclin D3	0.0610609	1.21424
313	Cell cycle kinase complex CDK5	5	0.587073	0.0755252	0.499271	1020	CDK5	cyclin-dependent kinase 5	0.749031	0.1255
313	Cell cycle kinase complex CDK5	5	0.587073	0.0755252	0.499271	1026	CDKN1A	cyclin-dependent kinase inhibitor 1A (p21, Cip1)	0.0041739	2.37946
313	Cell cycle kinase complex CDK5	5	0.587073	0.0755252	0.499271	5111	PCNA	proliferating cell nuclear antigen	0.204163	-0.690023
2880	SCF subcomplex (WEE1, SKP2, BTRC)	3	0.744819	0.075599	0.499271	6502	SKP2	S-phase kinase-associated protein 2 (p45)	0.677188	-0.169291
2880	SCF subcomplex (WEE1, SKP2, BTRC)	3	0.744819	0.075599	0.499271	7465	WEE1	WEE1 homolog (S. pombe)	0.0107673	1.96789
2880	SCF subcomplex (WEE1, SKP2, BTRC)	3	0.744819	0.075599	0.499271	8945	BTRC	beta-transducin repeat containing	0.366558	0.435857
228	SMCC complex	8	-0.376233	0.0756642	0.499271	892	CCNC	cyclin C	0.244027	0.612563
228	SMCC complex	8	-0.376233	0.0756642	0.499271	1024	CDK8	cyclin-dependent kinase 8	0.624651	-0.204363
228	SMCC complex	8	-0.376233	0.0756642	0.499271	5469	MED1	mediator complex subunit 1	0.0914742	-1.0387
228	SMCC complex	8	-0.376233	0.0756642	0.499271	9282	MED14	mediator complex subunit 14	0.961751	0.0169375
228	SMCC complex	8	-0.376233	0.0756642	0.499271	9412	MED21	mediator complex subunit 21	0.329244	0.482482
228	SMCC complex	8	-0.376233	0.0756642	0.499271	9862	MED24	mediator complex subunit 24	0.0126048	-1.89946
228	SMCC complex	8	-0.376233	0.0756642	0.499271	10001	MED6	mediator complex subunit 6	0.104669	-0.980181
228	SMCC complex	8	-0.376233	0.0756642	0.499271	51003	MED31	mediator complex subunit 31	0.998027	0.000857605
2921	SHARP-CtBP complex	3	0.741819	0.0764738	0.499271	1487	CTBP1	C-terminal binding protein 1	0.00447078	2.34962
2921	SHARP-CtBP complex	3	0.741819	0.0764738	0.499271	1488	CTBP2	C-terminal binding protein 2	0.56328	-0.249276
2921	SHARP-CtBP complex	3	0.741819	0.0764738	0.499271	23013	SPEN	spen homolog, transcriptional regulator (Drosophila)	0.749692	0.125117
1063	GRASP-GRP1 complex	2	-0.796955	0.0770814	0.499271	9265	CYTH3	cytohesin 3	0.69722	0.15663
1063	GRASP-GRP1 complex	2	-0.796955	0.0770814	0.499271	160622	GRASP	GRP1 (general receptor for phosphoinositides 1)-associated scaffold protein	0.0177606	-1.75054
1619	G protein complex (HDAC5, GNB1, GNG2)	3	0.737729	0.0776789	0.499271	2782	GNB1	guanine nucleotide binding protein (G protein), beta polypeptide 1	0.664541	-0.177478
1619	G protein complex (HDAC5, GNB1, GNG2)	3	0.737729	0.0776789	0.499271	10014	HDAC5	histone deacetylase 5	0.633585	-0.198195
1619	G protein complex (HDAC5, GNB1, GNG2)	3	0.737729	0.0776789	0.499271	54331	GNG2	guanine nucleotide binding protein (G protein), gamma 2	0.00257715	2.58886
836	20S methyltransferase core complex	2	-0.789531	0.0789138	0.499271	1207	CLNS1A	chloride channel, nucleotide-sensitive, 1A	0.214192	-0.669197
836	20S methyltransferase core complex	2	-0.789531	0.0789138	0.499271	10419	PRMT5	protein arginine methyltransferase 5	0.123065	-0.909865
1779	TGF-beta-receptor-PAR6 complex	3	0.730417	0.0798691	0.499271	7046	TGFBR1	transforming growth factor, beta receptor 1	0.425057	0.371553
1779	TGF-beta-receptor-PAR6 complex	3	0.730417	0.0798691	0.499271	7048	TGFBR2	transforming growth factor, beta receptor II (70/80kDa)	0.572067	0.242553
1779	TGF-beta-receptor-PAR6 complex	3	0.730417	0.0798691	0.499271	50855	PARD6A	par-6 partitioning defective 6 homolog alpha (C. elegans)	0.0264761	1.57715
2819	BRCA1-CtIP-CtBP complex	3	0.729161	0.08025	0.499271	672	BRCA1	breast cancer 1, early onset	0.87282	0.0590752
2819	BRCA1-CtIP-CtBP complex	3	0.729161	0.08025	0.499271	1487	CTBP1	C-terminal binding protein 1	0.00447078	2.34962
2819	BRCA1-CtIP-CtBP complex	3	0.729161	0.08025	0.499271	5932	RBBP8	retinoblastoma binding protein 8	0.600887	-0.221208
815	MRIP-MBS-RHOA complex	3	-0.64732	0.0803399	0.499271	387	RHOA	ras homolog gene family, member A	0.301411	-0.520841
815	MRIP-MBS-RHOA complex	3	-0.64732	0.0803399	0.499271	4659	PPP1R12A	protein phosphatase 1, regulatory (inhibitor) subunit 12A	0.783952	0.105711
815	MRIP-MBS-RHOA complex	3	-0.64732	0.0803399	0.499271	23164	MPRIP	myosin phosphatase Rho interacting protein	0.0297284	-1.52683
2510	ZAP70-CRKL-WIPF1-WAS complex	4	-0.544559	0.0803633	0.499271	1399	CRKL	v-crk sarcoma virus CT10 oncogene homolog (avian)-like	0.0841466	-1.07496
2510	ZAP70-CRKL-WIPF1-WAS complex	4	-0.544559	0.0803633	0.499271	7454	WAS	Wiskott-Aldrich syndrome (eczema-thrombocytopenia)	0.121028	-0.917116
2510	ZAP70-CRKL-WIPF1-WAS complex	4	-0.544559	0.0803633	0.499271	7456	WIPF1	WAS/WASL interacting protein family, member 1	0.782161	-0.106704
2510	ZAP70-CRKL-WIPF1-WAS complex	4	-0.544559	0.0803633	0.499271	7535	ZAP70	zeta-chain (TCR) associated protein kinase 70kDa	0.832814	-0.0794519
2174	COP9 signalosome complex	8	0.457812	0.0813577	0.499271	2873	GPS1	G protein pathway suppressor 1	0.797261	0.0983993
2174	COP9 signalosome complex	8	0.457812	0.0813577	0.499271	8533	COPS3	COP9 constitutive photomorphogenic homolog subunit 3 (Arabidopsis)	0.513115	0.289785
2174	COP9 signalosome complex	8	0.457812	0.0813577	0.499271	9318	COPS2	COP9 constitutive photomorphogenic homolog subunit 2 (Arabidopsis)	0.18718	0.727741
2174	COP9 signalosome complex	8	0.457812	0.0813577	0.499271	10920	COPS8	COP9 constitutive photomorphogenic homolog subunit 8 (Arabidopsis)	0.112269	0.949741
2174	COP9 signalosome complex	8	0.457812	0.0813577	0.499271	10980	COPS6	COP9 constitutive photomorphogenic homolog subunit 6 (Arabidopsis)	0.743346	0.128809
2174	COP9 signalosome complex	8	0.457812	0.0813577	0.499271	10987	COPS5	COP9 constitutive photomorphogenic homolog subunit 5 (Arabidopsis)	0.480253	-0.31853
2174	COP9 signalosome complex	8	0.457812	0.0813577	0.499271	51138	COPS4	COP9 constitutive photomorphogenic homolog subunit 4 (Arabidopsis)	0.0161652	1.79142
2174	COP9 signalosome complex	8	0.457812	0.0813577	0.499271	64708	COPS7B	COP9 constitutive photomorphogenic homolog subunit 7B (Arabidopsis)	0.988858	-0.00486613
955	LLGL2-PAR-6B-PRKCI complex	3	-0.643718	0.0814407	0.499271	3993	LLGL2	lethal giant larvae homolog 2 (Drosophila)	0.686029	-0.163658
955	LLGL2-PAR-6B-PRKCI complex	3	-0.643718	0.0814407	0.499271	5584	PRKCI	protein kinase C, iota	0.690116	0.161078
955	LLGL2-PAR-6B-PRKCI complex	3	-0.643718	0.0814407	0.499271	84612	PARD6B	par-6 partitioning defective 6 homolog beta (C. elegans)	0.0117876	-1.92857
1257	ALL-1 supercomplex	28	-0.175156	0.0825925	0.499271	1107	CHD3	chromodomain helicase DNA binding protein 3	0.895339	-0.0480127
1257	ALL-1 supercomplex	28	-0.175156	0.0825925	0.499271	3065	HDAC1	histone deacetylase 1	0.729001	-0.137272
1257	ALL-1 supercomplex	28	-0.175156	0.0825925	0.499271	3066	HDAC2	histone deacetylase 2	0.510678	-0.291853
1257	ALL-1 supercomplex	28	-0.175156	0.0825925	0.499271	4297	MLL	myeloid/lymphoid or mixed-lineage leukemia (trithorax homolog, Drosophila)	0.586941	0.231405
1257	ALL-1 supercomplex	28	-0.175156	0.0825925	0.499271	5901	RAN	RAN, member RAS oncogene family	0.206186	-0.685741
1257	ALL-1 supercomplex	28	-0.175156	0.0825925	0.499271	5928	RBBP4	retinoblastoma binding protein 4	0.213744	-0.670107
1257	ALL-1 supercomplex	28	-0.175156	0.0825925	0.499271	5929	RBBP5	retinoblastoma binding protein 5	0.861264	-0.0648636
1257	ALL-1 supercomplex	28	-0.175156	0.0825925	0.499271	5931	RBBP7	retinoblastoma binding protein 7	0.455238	-0.341761
1257	ALL-1 supercomplex	28	-0.175156	0.0825925	0.499271	6595	SMARCA2	SWI/SNF related, matrix associated, actin dependent regulator of chromatin, subfamily a, member 2	0.865452	0.0627572
1257	ALL-1 supercomplex	28	-0.175156	0.0825925	0.499271	6598	SMARCB1	SWI/SNF related, matrix associated, actin dependent regulator of chromatin, subfamily b, member 1	0.698804	0.155644
1257	ALL-1 supercomplex	28	-0.175156	0.0825925	0.499271	6599	SMARCC1	SWI/SNF related, matrix associated, actin dependent regulator of chromatin, subfamily c, member 1	0.250072	0.601934
1257	ALL-1 supercomplex	28	-0.175156	0.0825925	0.499271	6601	SMARCC2	SWI/SNF related, matrix associated, actin dependent regulator of chromatin, subfamily c, member 2	0.227317	0.643368
1257	ALL-1 supercomplex	28	-0.175156	0.0825925	0.499271	6872	TAF1	TAF1 RNA polymerase II, TATA box binding protein (TBP)-associated factor, 250kDa	0.183738	0.7358
1257	ALL-1 supercomplex	28	-0.175156	0.0825925	0.499271	6878	TAF6	TAF6 RNA polymerase II, TATA box binding protein (TBP)-associated factor, 80kDa	0.226988	-0.643998
1257	ALL-1 supercomplex	28	-0.175156	0.0825925	0.499271	6880	TAF9	TAF9 RNA polymerase II, TATA box binding protein (TBP)-associated factor, 32kDa	0.316188	-0.500055
1257	ALL-1 supercomplex	28	-0.175156	0.0825925	0.499271	6883	TAF12	TAF12 RNA polymerase II, TATA box binding protein (TBP)-associated factor, 20kDa	0.578043	0.23804
1257	ALL-1 supercomplex	28	-0.175156	0.0825925	0.499271	6908	TBP	TATA box binding protein	0.371095	-0.430514
1257	ALL-1 supercomplex	28	-0.175156	0.0825925	0.499271	8189	SYMPK	symplekin	0.0148024	-1.82967
1257	ALL-1 supercomplex	28	-0.175156	0.0825925	0.499271	8467	SMARCA5	SWI/SNF related, matrix associated, actin dependent regulator of chromatin, subfamily a, member 5	0.162943	0.787965
1257	ALL-1 supercomplex	28	-0.175156	0.0825925	0.499271	8819	SAP30	Sin3A-associated protein, 30kDa	0.754271	-0.122472
1257	ALL-1 supercomplex	28	-0.175156	0.0825925	0.499271	9219	MTA2	metastasis associated 1 family, member 2	0.596887	-0.224108
1257	ALL-1 supercomplex	28	-0.175156	0.0825925	0.499271	9343	EFTUD2	elongation factor Tu GTP binding domain containing 2	0.175154	-0.75658
1257	ALL-1 supercomplex	28	-0.175156	0.0825925	0.499271	10284	SAP18	Sin3A-associated protein, 18kDa	0.976521	0.0103185
1257	ALL-1 supercomplex	28	-0.175156	0.0825925	0.499271	11091	WDR5	WD repeat domain 5	0.0233649	-1.63144
1257	ALL-1 supercomplex	28	-0.175156	0.0825925	0.499271	23028	KDM1A	lysine (K)-specific demethylase 1A	0.484739	0.314492
1257	ALL-1 supercomplex	28	-0.175156	0.0825925	0.499271	25942	SIN3A	SIN3 homolog A, transcription regulator (yeast)	0.723352	-0.14065
1257	ALL-1 supercomplex	28	-0.175156	0.0825925	0.499271	53615	MBD3	methyl-CpG binding domain protein 3	0.198855	-0.701462
1257	ALL-1 supercomplex	28	-0.175156	0.0825925	0.499271	53981	CPSF2	cleavage and polyadenylation specific factor 2, 100kDa	0.292098	0.534472
3045	hs4 enhancer complex (faster migrating complex)	5	-0.476188	0.0828807	0.499271	4790	NFKB1	nuclear factor of kappa light polypeptide gene enhancer in B-cells 1	0.632905	-0.198661
3045	hs4 enhancer complex (faster migrating complex)	5	-0.476188	0.0828807	0.499271	5451	POU2F1	POU class 2 homeobox 1	0.326705	-0.485844
3045	hs4 enhancer complex (faster migrating complex)	5	-0.476188	0.0828807	0.499271	5452	POU2F2	POU class 2 homeobox 2	0.0379972	-1.42025
3045	hs4 enhancer complex (faster migrating complex)	5	-0.476188	0.0828807	0.499271	5970	RELA	v-rel reticuloendotheliosis viral oncogene homolog A (avian)	0.613346	-0.212295
3045	hs4 enhancer complex (faster migrating complex)	5	-0.476188	0.0828807	0.499271	7528	YY1	YY1 transcription factor	0.863197	-0.0638903
3750	CREBBP-SMAD3 hexameric complex	2	-0.772749	0.0831772	0.499271	1387	CREBBP	CREB binding protein	0.223568	-0.650591
3750	CREBBP-SMAD3 hexameric complex	2	-0.772749	0.0831772	0.499271	4088	SMAD3	SMAD family member 3	0.127377	-0.894907
2417	ITGA4-ITGB1-EMILIN1 complex	3	-0.636886	0.08356	0.499271	3676	ITGA4	integrin, alpha 4 (antigen CD49D, alpha 4 subunit of VLA-4 receptor)	0.0576718	-1.23904
2417	ITGA4-ITGB1-EMILIN1 complex	3	-0.636886	0.08356	0.499271	3688	ITGB1	integrin, beta 1 (fibronectin receptor, beta polypeptide, antigen CD29 includes MDF2, MSK12)	0.650123	-0.187004
2417	ITGA4-ITGB1-EMILIN1 complex	3	-0.636886	0.08356	0.499271	11117	EMILIN1	elastin microfibril interfacer 1	0.32763	-0.484616
5449	Splicing-associated factors complex	5	-0.472839	0.0842461	0.499271	7913	DEK	DEK oncogene	0.870249	0.0603564
5449	Splicing-associated factors complex	5	-0.472839	0.0842461	0.499271	9939	RBM8A	RNA binding motif protein 8A	0.23091	-0.636557
5449	Splicing-associated factors complex	5	-0.472839	0.0842461	0.499271	10189	THOC4	THO complex 4	0.662331	0.178925
5449	Splicing-associated factors complex	5	-0.472839	0.0842461	0.499271	10250	SRRM1	serine/arginine repetitive matrix 1	0.0137072	-1.86305
5449	Splicing-associated factors complex	5	-0.472839	0.0842461	0.499271	10921	RNPS1	RNA binding protein S1, serine-rich domain	0.787285	-0.103868
5716	eNOS-HSP90 complex, VEGF induced	2	-0.768629	0.0842499	0.499271	3320	HSP90AA1	heat shock protein 90kDa alpha (cytosolic), class A member 1	0.925066	0.0338271
5716	eNOS-HSP90 complex, VEGF induced	2	-0.768629	0.0842499	0.499271	4846	NOS3	nitric oxide synthase 3 (endothelial cell)	0.0268482	-1.57109
299	IRF3-CBP complex	3	0.715453	0.0844966	0.499271	3661	IRF3	interferon regulatory factor 3	0.482107	-0.316856
299	IRF3-CBP complex	3	0.715453	0.0844966	0.499271	10370	CITED2	Cbp/p300-interacting transactivator, with Glu/Asp-rich carboxy-terminal domain, 2	0.707478	-0.150287
299	IRF3-CBP complex	3	0.715453	0.0844966	0.499271	163732	CITED4	Cbp/p300-interacting transactivator, with Glu/Asp-rich carboxy-terminal domain, 4	0.00243499	2.6135
2599	POLR2A-CCNT1-CDK9-NCL-LEM6-CPSF2 complex	6	-0.4246	0.0846102	0.499271	904	CCNT1	cyclin T1	0.692218	-0.159757
2599	POLR2A-CCNT1-CDK9-NCL-LEM6-CPSF2 complex	6	-0.4246	0.0846102	0.499271	1025	CDK9	cyclin-dependent kinase 9	0.109377	-0.961074
2599	POLR2A-CCNT1-CDK9-NCL-LEM6-CPSF2 complex	6	-0.4246	0.0846102	0.499271	4691	NCL	nucleolin	0.21109	0.675532
2599	POLR2A-CCNT1-CDK9-NCL-LEM6-CPSF2 complex	6	-0.4246	0.0846102	0.499271	5430	POLR2A	polymerase (RNA) II (DNA directed) polypeptide A, 220kDa	0.0666343	-1.1763
2599	POLR2A-CCNT1-CDK9-NCL-LEM6-CPSF2 complex	6	-0.4246	0.0846102	0.499271	10891	PPARGC1A	peroxisome proliferator-activated receptor gamma, coactivator 1 alpha	0.0346361	-1.46047
2599	POLR2A-CCNT1-CDK9-NCL-LEM6-CPSF2 complex	6	-0.4246	0.0846102	0.499271	53981	CPSF2	cleavage and polyadenylation specific factor 2, 100kDa	0.292098	0.534472
1178	BCOR complex	8	-0.358137	0.084809	0.499271	3312	HSPA8	heat shock 70kDa protein 8	0.0788937	-1.10296
1178	BCOR complex	8	-0.358137	0.084809	0.499271	6015	RING1	ring finger protein 1	0.392639	0.406007
1178	BCOR complex	8	-0.358137	0.084809	0.499271	6045	RNF2	ring finger protein 2	0.684388	-0.164698
1178	BCOR complex	8	-0.358137	0.084809	0.499271	6500	SKP1	S-phase kinase-associated protein 1	0.34064	-0.467704
1178	BCOR complex	8	-0.358137	0.084809	0.499271	23429	RYBP	RING1 and YY1 binding protein	0.895154	-0.0481023
1178	BCOR complex	8	-0.358137	0.084809	0.499271	54880	BCOR	BCL6 corepressor	0.701235	0.154136
1178	BCOR complex	8	-0.358137	0.084809	0.499271	84678	KDM2B	lysine (K)-specific demethylase 2B	0.154439	-0.811243
1178	BCOR complex	8	-0.358137	0.084809	0.499271	84759	PCGF1	polycomb group ring finger 1	0.14773	-0.830532
2755	17S U2 snRNP	33	-0.154729	0.0848983	0.499271	1665	DHX15	DEAH (Asp-Glu-Ala-His) box polypeptide 15	0.783476	0.105974
2755	17S U2 snRNP	33	-0.154729	0.0848983	0.499271	3329	HSPD1	heat shock 60kDa protein 1 (chaperonin)	0.778861	-0.10854
2755	17S U2 snRNP	33	-0.154729	0.0848983	0.499271	6426	SRSF1	serine/arginine-rich splicing factor 1	0.855992	-0.0675302
2755	17S U2 snRNP	33	-0.154729	0.0848983	0.499271	6627	SNRPA1	small nuclear ribonucleoprotein polypeptide A'	0.720653	-0.142274
2755	17S U2 snRNP	33	-0.154729	0.0848983	0.499271	6628	SNRPB	small nuclear ribonucleoprotein polypeptides B and B1	0.064262	1.19205
2755	17S U2 snRNP	33	-0.154729	0.0848983	0.499271	6629	SNRPB2	small nuclear ribonucleoprotein polypeptide B	0.375732	0.425122
2755	17S U2 snRNP	33	-0.154729	0.0848983	0.499271	6632	SNRPD1	small nuclear ribonucleoprotein D1 polypeptide 16kDa	0.844264	0.0735217
2755	17S U2 snRNP	33	-0.154729	0.0848983	0.499271	6633	SNRPD2	small nuclear ribonucleoprotein D2 polypeptide 16.5kDa	0.661412	0.179528
2755	17S U2 snRNP	33	-0.154729	0.0848983	0.499271	6634	SNRPD3	small nuclear ribonucleoprotein D3 polypeptide 18kDa	0.0900493	-1.04552
2755	17S U2 snRNP	33	-0.154729	0.0848983	0.499271	6635	SNRPE	small nuclear ribonucleoprotein polypeptide E	0.0783068	1.1062
2755	17S U2 snRNP	33	-0.154729	0.0848983	0.499271	6636	SNRPF	small nuclear ribonucleoprotein polypeptide F	0.694071	-0.158596
2755	17S U2 snRNP	33	-0.154729	0.0848983	0.499271	6637	SNRPG	small nuclear ribonucleoprotein polypeptide G	0.557591	0.253684
2755	17S U2 snRNP	33	-0.154729	0.0848983	0.499271	7307	U2AF1	U2 small nuclear RNA auxiliary factor 1	0.716902	0.14454
2755	17S U2 snRNP	33	-0.154729	0.0848983	0.499271	8175	SF3A2	splicing factor 3a, subunit 2, 66kDa	0.149334	-0.82584
2755	17S U2 snRNP	33	-0.154729	0.0848983	0.499271	9879	DDX46	DEAD (Asp-Glu-Ala-Asp) box polypeptide 46	0.23825	-0.622967
2755	17S U2 snRNP	33	-0.154729	0.0848983	0.499271	10131	TRAP1	TNF receptor-associated protein 1	0.869197	0.060882
2755	17S U2 snRNP	33	-0.154729	0.0848983	0.499271	10262	SF3B4	splicing factor 3b, subunit 4, 49kDa	0.631917	-0.19934
2755	17S U2 snRNP	33	-0.154729	0.0848983	0.499271	10285	SMNDC1	survival motor neuron domain containing 1	0.396654	0.401588
2755	17S U2 snRNP	33	-0.154729	0.0848983	0.499271	10291	SF3A1	splicing factor 3a, subunit 1, 120kDa	0.678002	-0.168769
2755	17S U2 snRNP	33	-0.154729	0.0848983	0.499271	10362	HMG20B	high-mobility group 20B	0.323514	-0.490107
2755	17S U2 snRNP	33	-0.154729	0.0848983	0.499271	10523	CHERP	calcium homeostasis endoplasmic reticulum protein	0.60097	-0.221147
2755	17S U2 snRNP	33	-0.154729	0.0848983	0.499271	10946	SF3A3	splicing factor 3a, subunit 3, 60kDa	0.0219067	-1.65942
2755	17S U2 snRNP	33	-0.154729	0.0848983	0.499271	10992	SF3B2	splicing factor 3b, subunit 2, 145kDa	0.218616	-0.660317
2755	17S U2 snRNP	33	-0.154729	0.0848983	0.499271	11338	U2AF2	U2 small nuclear RNA auxiliary factor 2	0.224175	-0.649412
2755	17S U2 snRNP	33	-0.154729	0.0848983	0.499271	22826	DNAJC8	DnaJ (Hsp40) homolog, subfamily C, member 8	0.14233	0.846705
2755	17S U2 snRNP	33	-0.154729	0.0848983	0.499271	22827	PUF60	poly-U binding splicing factor 60KDa	0.00416868	-2.38
2755	17S U2 snRNP	33	-0.154729	0.0848983	0.499271	23350	U2SURP	U2 snRNP-associated SURP domain containing	0.398639	0.39942
2755	17S U2 snRNP	33	-0.154729	0.0848983	0.499271	23450	SF3B3	splicing factor 3b, subunit 3, 130kDa	0.658181	-0.181655
2755	17S U2 snRNP	33	-0.154729	0.0848983	0.499271	23451	SF3B1	splicing factor 3b, subunit 1, 155kDa	0.668036	-0.1752
2755	17S U2 snRNP	33	-0.154729	0.0848983	0.499271	51639	SF3B14	splicing factor 3B, 14 kDa subunit	0.224175	0.649412
2755	17S U2 snRNP	33	-0.154729	0.0848983	0.499271	83443	SF3B5	splicing factor 3b, subunit 5, 10kDa	0.643166	-0.191677
2755	17S U2 snRNP	33	-0.154729	0.0848983	0.499271	84844	PHF5A	PHD finger protein 5A	0.14873	-0.8276
2755	17S U2 snRNP	33	-0.154729	0.0848983	0.499271	84991	RBM17	RNA binding motif protein 17	0.678002	-0.168769
1089	VAM1-VELI1 complex	2	0.853368	0.0856433	0.499271	8825	LIN7A	lin-7 homolog A (C. elegans)	0.185652	0.7313
1089	VAM1-VELI1 complex	2	0.853368	0.0856433	0.499271	51678	MPP6	membrane protein, palmitoylated 6 (MAGUK p55 subfamily member 6)	0.105819	0.975435
785	Exon junction complex	8	-0.355937	0.0859745	0.499271	4116	MAGOH	mago-nashi homolog, proliferation-associated (Drosophila)	0.647934	-0.188469
785	Exon junction complex	8	-0.355937	0.0859745	0.499271	7919	DDX39B	DEAD (Asp-Glu-Ala-Asp) box polypeptide 39B	0.675815	-0.170172
785	Exon junction complex	8	-0.355937	0.0859745	0.499271	9775	EIF4A3	eukaryotic translation initiation factor 4A3	0.883155	-0.0539631
785	Exon junction complex	8	-0.355937	0.0859745	0.499271	9939	RBM8A	RNA binding motif protein 8A	0.23091	-0.636557
785	Exon junction complex	8	-0.355937	0.0859745	0.499271	10189	THOC4	THO complex 4	0.662331	0.178925
785	Exon junction complex	8	-0.355937	0.0859745	0.499271	10250	SRRM1	serine/arginine repetitive matrix 1	0.0137072	-1.86305
785	Exon junction complex	8	-0.355937	0.0859745	0.499271	10921	RNPS1	RNA binding protein S1, serine-rich domain	0.787285	-0.103868
785	Exon junction complex	8	-0.355937	0.0859745	0.499271	65109	UPF3B	UPF3 regulator of nonsense transcripts homolog B (yeast)	0.976464	-0.0103438
2565	CD20-LCK-LYN-FYN-p75/80 complex, (Raji human B cell line)	4	0.614135	0.0862214	0.499271	931	MS4A1	membrane-spanning 4-domains, subfamily A, member 1	0.00227704	2.64263
2565	CD20-LCK-LYN-FYN-p75/80 complex, (Raji human B cell line)	4	0.614135	0.0862214	0.499271	2534	FYN	FYN oncogene related to SRC, FGR, YES	0.58412	0.233498
2565	CD20-LCK-LYN-FYN-p75/80 complex, (Raji human B cell line)	4	0.614135	0.0862214	0.499271	3932	LCK	lymphocyte-specific protein tyrosine kinase	0.138963	-0.857102
2565	CD20-LCK-LYN-FYN-p75/80 complex, (Raji human B cell line)	4	0.614135	0.0862214	0.499271	4067	LYN	v-yes-1 Yamaguchi sarcoma viral related oncogene homolog	0.36516	0.437516
1700	ABL2-HRAS-RIN1 complex	3	-0.627757	0.0864559	0.499271	27	ABL2	v-abl Abelson murine leukemia viral oncogene homolog 2	0.668738	0.174744
1700	ABL2-HRAS-RIN1 complex	3	-0.627757	0.0864559	0.499271	3265	HRAS	v-Ha-ras Harvey rat sarcoma viral oncogene homolog	0.188326	-0.725089
1700	ABL2-HRAS-RIN1 complex	3	-0.627757	0.0864559	0.499271	9610	RIN1	Ras and Rab interactor 1	0.0464595	-1.33293
193	PA700-20S-PA28 complex	36	-0.143891	0.0866062	0.499271	5682	PSMA1	proteasome (prosome, macropain) subunit, alpha type, 1	0.374409	0.426654
193	PA700-20S-PA28 complex	36	-0.143891	0.0866062	0.499271	5683	PSMA2	proteasome (prosome, macropain) subunit, alpha type, 2	0.813919	0.0894189
193	PA700-20S-PA28 complex	36	-0.143891	0.0866062	0.499271	5684	PSMA3	proteasome (prosome, macropain) subunit, alpha type, 3	0.765871	0.115844
193	PA700-20S-PA28 complex	36	-0.143891	0.0866062	0.499271	5685	PSMA4	proteasome (prosome, macropain) subunit, alpha type, 4	0.487328	-0.312179
193	PA700-20S-PA28 complex	36	-0.143891	0.0866062	0.499271	5686	PSMA5	proteasome (prosome, macropain) subunit, alpha type, 5	0.83276	-0.0794804
193	PA700-20S-PA28 complex	36	-0.143891	0.0866062	0.499271	5687	PSMA6	proteasome (prosome, macropain) subunit, alpha type, 6	0.0345441	-1.46163
193	PA700-20S-PA28 complex	36	-0.143891	0.0866062	0.499271	5688	PSMA7	proteasome (prosome, macropain) subunit, alpha type, 7	0.10264	-0.988681
193	PA700-20S-PA28 complex	36	-0.143891	0.0866062	0.499271	5689	PSMB1	proteasome (prosome, macropain) subunit, beta type, 1	0.723107	0.140797
193	PA700-20S-PA28 complex	36	-0.143891	0.0866062	0.499271	5690	PSMB2	proteasome (prosome, macropain) subunit, beta type, 2	0.700051	0.15487
193	PA700-20S-PA28 complex	36	-0.143891	0.0866062	0.499271	5691	PSMB3	proteasome (prosome, macropain) subunit, beta type, 3	0.361914	-0.441394
193	PA700-20S-PA28 complex	36	-0.143891	0.0866062	0.499271	5692	PSMB4	proteasome (prosome, macropain) subunit, beta type, 4	0.00398043	-2.40007
193	PA700-20S-PA28 complex	36	-0.143891	0.0866062	0.499271	5693	PSMB5	proteasome (prosome, macropain) subunit, beta type, 5	0.705177	0.151702
193	PA700-20S-PA28 complex	36	-0.143891	0.0866062	0.499271	5694	PSMB6	proteasome (prosome, macropain) subunit, beta type, 6	0.0519086	-1.28476
193	PA700-20S-PA28 complex	36	-0.143891	0.0866062	0.499271	5695	PSMB7	proteasome (prosome, macropain) subunit, beta type, 7	0.8255	0.0832831
193	PA700-20S-PA28 complex	36	-0.143891	0.0866062	0.499271	5700	PSMC1	proteasome (prosome, macropain) 26S subunit, ATPase, 1	0.924375	0.0341519
193	PA700-20S-PA28 complex	36	-0.143891	0.0866062	0.499271	5701	PSMC2	proteasome (prosome, macropain) 26S subunit, ATPase, 2	0.87877	0.0561249
193	PA700-20S-PA28 complex	36	-0.143891	0.0866062	0.499271	5702	PSMC3	proteasome (prosome, macropain) 26S subunit, ATPase, 3	0.0456195	-1.34085
193	PA700-20S-PA28 complex	36	-0.143891	0.0866062	0.499271	5704	PSMC4	proteasome (prosome, macropain) 26S subunit, ATPase, 4	0.671359	-0.173045
193	PA700-20S-PA28 complex	36	-0.143891	0.0866062	0.499271	5705	PSMC5	proteasome (prosome, macropain) 26S subunit, ATPase, 5	0.273846	-0.562494
193	PA700-20S-PA28 complex	36	-0.143891	0.0866062	0.499271	5706	PSMC6	proteasome (prosome, macropain) 26S subunit, ATPase, 6	0.0131196	1.88208
193	PA700-20S-PA28 complex	36	-0.143891	0.0866062	0.499271	5707	PSMD1	proteasome (prosome, macropain) 26S subunit, non-ATPase, 1	0.297149	0.527025
193	PA700-20S-PA28 complex	36	-0.143891	0.0866062	0.499271	5708	PSMD2	proteasome (prosome, macropain) 26S subunit, non-ATPase, 2	0.849174	-0.0710034
193	PA700-20S-PA28 complex	36	-0.143891	0.0866062	0.499271	5709	PSMD3	proteasome (prosome, macropain) 26S subunit, non-ATPase, 3	0.286301	0.543178
193	PA700-20S-PA28 complex	36	-0.143891	0.0866062	0.499271	5710	PSMD4	proteasome (prosome, macropain) 26S subunit, non-ATPase, 4	0.382271	0.417629
193	PA700-20S-PA28 complex	36	-0.143891	0.0866062	0.499271	5711	PSMD5	proteasome (prosome, macropain) 26S subunit, non-ATPase, 5	0.840043	0.0756982
193	PA700-20S-PA28 complex	36	-0.143891	0.0866062	0.499271	5713	PSMD7	proteasome (prosome, macropain) 26S subunit, non-ATPase, 7	0.176463	0.753346
193	PA700-20S-PA28 complex	36	-0.143891	0.0866062	0.499271	5714	PSMD8	proteasome (prosome, macropain) 26S subunit, non-ATPase, 8	0.575988	-0.239587
193	PA700-20S-PA28 complex	36	-0.143891	0.0866062	0.499271	5715	PSMD9	proteasome (prosome, macropain) 26S subunit, non-ATPase, 9	0.456862	-0.340215
193	PA700-20S-PA28 complex	36	-0.143891	0.0866062	0.499271	5716	PSMD10	proteasome (prosome, macropain) 26S subunit, non-ATPase, 10	0.338635	0.470268
193	PA700-20S-PA28 complex	36	-0.143891	0.0866062	0.499271	5717	PSMD11	proteasome (prosome, macropain) 26S subunit, non-ATPase, 11	0.804256	-0.0946055
193	PA700-20S-PA28 complex	36	-0.143891	0.0866062	0.499271	5718	PSMD12	proteasome (prosome, macropain) 26S subunit, non-ATPase, 12	0.0513431	-1.28952
193	PA700-20S-PA28 complex	36	-0.143891	0.0866062	0.499271	5719	PSMD13	proteasome (prosome, macropain) 26S subunit, non-ATPase, 13	0.8645	0.0632352
193	PA700-20S-PA28 complex	36	-0.143891	0.0866062	0.499271	5720	PSME1	proteasome (prosome, macropain) activator subunit 1 (PA28 alpha)	0.254936	-0.593569
193	PA700-20S-PA28 complex	36	-0.143891	0.0866062	0.499271	5721	PSME2	proteasome (prosome, macropain) activator subunit 2 (PA28 beta)	0.628052	-0.202005
193	PA700-20S-PA28 complex	36	-0.143891	0.0866062	0.499271	9861	PSMD6	proteasome (prosome, macropain) 26S subunit, non-ATPase, 6	0.616563	0.210023
193	PA700-20S-PA28 complex	36	-0.143891	0.0866062	0.499271	10213	PSMD14	proteasome (prosome, macropain) 26S subunit, non-ATPase, 14	0.316458	0.499684
2318	ITGA6-ITGB4-Laminin10/12 complex	5	-0.465983	0.0870941	0.499271	3655	ITGA6	integrin, alpha 6	0.564066	0.24867
2318	ITGA6-ITGB4-Laminin10/12 complex	5	-0.465983	0.0870941	0.499271	3691	ITGB4	integrin, beta 4	0.922614	-0.03498
2318	ITGA6-ITGB4-Laminin10/12 complex	5	-0.465983	0.0870941	0.499271	3911	LAMA5	laminin, alpha 5	0.128037	-0.892663
2318	ITGA6-ITGB4-Laminin10/12 complex	5	-0.465983	0.0870941	0.499271	3912	LAMB1	laminin, beta 1	0.0963472	-1.01616
2318	ITGA6-ITGB4-Laminin10/12 complex	5	-0.465983	0.0870941	0.499271	3915	LAMC1	laminin, gamma 1 (formerly LAMB2)	0.231857	-0.634779
1169	SNARE complex (STX4, VAMP8, VAMP3, SNAP23)	4	0.611752	0.0871201	0.499271	6810	STX4	syntaxin 4	0.953345	-0.02075
1169	SNARE complex (STX4, VAMP8, VAMP3, SNAP23)	4	0.611752	0.0871201	0.499271	8673	VAMP8	vesicle-associated membrane protein 8 (endobrevin)	0.966914	0.0146123
1169	SNARE complex (STX4, VAMP8, VAMP3, SNAP23)	4	0.611752	0.0871201	0.499271	8773	SNAP23	synaptosomal-associated protein, 23kDa	0.700642	0.154504
1169	SNARE complex (STX4, VAMP8, VAMP3, SNAP23)	4	0.611752	0.0871201	0.499271	9341	VAMP3	vesicle-associated membrane protein 3 (cellubrevin)	0.00502758	2.29864
351	Spliceosome	142	-0.0483457	0.0875075	0.499271	988	CDC5L	CDC5 cell division cycle 5-like (S. pombe)	0.613969	0.211853
351	Spliceosome	142	-0.0483457	0.0875075	0.499271	1153	CIRBP	cold inducible RNA binding protein	0.35849	-0.445524
351	Spliceosome	142	-0.0483457	0.0875075	0.499271	1654	DDX3X	DEAD (Asp-Glu-Ala-Asp) box polypeptide 3, X-linked	0.435127	0.361384
351	Spliceosome	142	-0.0483457	0.0875075	0.499271	1655	DDX5	DEAD (Asp-Glu-Ala-Asp) box polypeptide 5	0.833949	0.0788607
351	Spliceosome	142	-0.0483457	0.0875075	0.499271	1659	DHX8	DEAH (Asp-Glu-Ala-His) box polypeptide 8	0.964613	0.0156467
351	Spliceosome	142	-0.0483457	0.0875075	0.499271	1660	DHX9	DEAH (Asp-Glu-Ala-His) box polypeptide 9	0.00224174	2.64941
351	Spliceosome	142	-0.0483457	0.0875075	0.499271	1665	DHX15	DEAH (Asp-Glu-Ala-His) box polypeptide 15	0.783476	0.105974
351	Spliceosome	142	-0.0483457	0.0875075	0.499271	3550	IK	IK cytokine, down-regulator of HLA II	0.661368	-0.179557
351	Spliceosome	142	-0.0483457	0.0875075	0.499271	4116	MAGOH	mago-nashi homolog, proliferation-associated (Drosophila)	0.647934	-0.188469
351	Spliceosome	142	-0.0483457	0.0875075	0.499271	4236	MFAP1	microfibrillar-associated protein 1	0.368909	-0.43308
351	Spliceosome	142	-0.0483457	0.0875075	0.499271	4343	MOV10	Mov10, Moloney leukemia virus 10, homolog (mouse)	0.847824	0.0716944
351	Spliceosome	142	-0.0483457	0.0875075	0.499271	4686	NCBP1	nuclear cap binding protein subunit 1, 80kDa	0.558509	-0.25297
351	Spliceosome	142	-0.0483457	0.0875075	0.499271	4809	NHP2L1	NHP2 non-histone chromosome protein 2-like 1 (S. cerevisiae)	0.66048	0.18014
351	Spliceosome	142	-0.0483457	0.0875075	0.499271	5356	PLRG1	pleiotropic regulator 1 (PRL1 homolog, Arabidopsis)	0.696304	0.157201
351	Spliceosome	142	-0.0483457	0.0875075	0.499271	5496	PPM1G	protein phosphatase, Mg2+/Mn2+ dependent, 1G	0.95216	-0.0212903
351	Spliceosome	142	-0.0483457	0.0875075	0.499271	6426	SRSF1	serine/arginine-rich splicing factor 1	0.855992	-0.0675302
351	Spliceosome	142	-0.0483457	0.0875075	0.499271	6427	SRSF2	serine/arginine-rich splicing factor 2	0.577324	0.23858
351	Spliceosome	142	-0.0483457	0.0875075	0.499271	6428	SRSF3	serine/arginine-rich splicing factor 3	0.743907	-0.128481
351	Spliceosome	142	-0.0483457	0.0875075	0.499271	6429	SRSF4	serine/arginine-rich splicing factor 4	0.966136	-0.0149616
351	Spliceosome	142	-0.0483457	0.0875075	0.499271	6430	SRSF5	serine/arginine-rich splicing factor 5	0.879938	0.0555478
351	Spliceosome	142	-0.0483457	0.0875075	0.499271	6431	SRSF6	serine/arginine-rich splicing factor 6	0.227559	0.642906
351	Spliceosome	142	-0.0483457	0.0875075	0.499271	6432	SRSF7	serine/arginine-rich splicing factor 7	0.719547	0.142941
351	Spliceosome	142	-0.0483457	0.0875075	0.499271	6434	TRA2B	transformer 2 beta homolog (Drosophila)	0.320357	-0.494365
351	Spliceosome	142	-0.0483457	0.0875075	0.499271	6625	SNRNP70	small nuclear ribonucleoprotein 70kDa (U1)	0.0354273	-1.45066
351	Spliceosome	142	-0.0483457	0.0875075	0.499271	6626	SNRPA	small nuclear ribonucleoprotein polypeptide A	0.902071	-0.0447595
351	Spliceosome	142	-0.0483457	0.0875075	0.499271	6627	SNRPA1	small nuclear ribonucleoprotein polypeptide A'	0.720653	-0.142274
351	Spliceosome	142	-0.0483457	0.0875075	0.499271	6628	SNRPB	small nuclear ribonucleoprotein polypeptides B and B1	0.064262	1.19205
351	Spliceosome	142	-0.0483457	0.0875075	0.499271	6629	SNRPB2	small nuclear ribonucleoprotein polypeptide B	0.375732	0.425122
351	Spliceosome	142	-0.0483457	0.0875075	0.499271	6631	SNRPC	small nuclear ribonucleoprotein polypeptide C	0.382044	-0.417886
351	Spliceosome	142	-0.0483457	0.0875075	0.499271	6632	SNRPD1	small nuclear ribonucleoprotein D1 polypeptide 16kDa	0.844264	0.0735217
351	Spliceosome	142	-0.0483457	0.0875075	0.499271	6633	SNRPD2	small nuclear ribonucleoprotein D2 polypeptide 16.5kDa	0.661412	0.179528
351	Spliceosome	142	-0.0483457	0.0875075	0.499271	6634	SNRPD3	small nuclear ribonucleoprotein D3 polypeptide 18kDa	0.0900493	-1.04552
351	Spliceosome	142	-0.0483457	0.0875075	0.499271	6635	SNRPE	small nuclear ribonucleoprotein polypeptide E	0.0783068	1.1062
351	Spliceosome	142	-0.0483457	0.0875075	0.499271	6636	SNRPF	small nuclear ribonucleoprotein polypeptide F	0.694071	-0.158596
351	Spliceosome	142	-0.0483457	0.0875075	0.499271	6637	SNRPG	small nuclear ribonucleoprotein polypeptide G	0.557591	0.253684
351	Spliceosome	142	-0.0483457	0.0875075	0.499271	7307	U2AF1	U2 small nuclear RNA auxiliary factor 1	0.716902	0.14454
351	Spliceosome	142	-0.0483457	0.0875075	0.499271	7536	SF1	splicing factor 1	0.837927	-0.0767937
351	Spliceosome	142	-0.0483457	0.0875075	0.499271	7756	ZNF207	zinc finger protein 207	0.373539	0.427664
351	Spliceosome	142	-0.0483457	0.0875075	0.499271	7919	DDX39B	DEAD (Asp-Glu-Ala-Asp) box polypeptide 39B	0.675815	-0.170172
351	Spliceosome	142	-0.0483457	0.0875075	0.499271	8175	SF3A2	splicing factor 3a, subunit 2, 66kDa	0.149334	-0.82584
351	Spliceosome	142	-0.0483457	0.0875075	0.499271	8220	DGCR14	DiGeorge syndrome critical region gene 14	0.66849	0.174905
351	Spliceosome	142	-0.0483457	0.0875075	0.499271	8449	DHX16	DEAH (Asp-Glu-Ala-His) box polypeptide 16	0.52706	0.27814
351	Spliceosome	142	-0.0483457	0.0875075	0.499271	8559	PRPF18	PRP18 pre-mRNA processing factor 18 homolog (S. cerevisiae)	0.386687	0.41264
351	Spliceosome	142	-0.0483457	0.0875075	0.499271	8563	THOC5	THO complex 5	0.00978373	-2.0095
351	Spliceosome	142	-0.0483457	0.0875075	0.499271	8683	SRSF9	serine/arginine-rich splicing factor 9	0.158435	-0.800148
351	Spliceosome	142	-0.0483457	0.0875075	0.499271	8896	BUD31	BUD31 homolog (S. cerevisiae)	0.657063	0.182393
351	Spliceosome	142	-0.0483457	0.0875075	0.499271	8899	PRPF4B	PRP4 pre-mRNA processing factor 4 homolog B (yeast)	0.0626978	1.20275
351	Spliceosome	142	-0.0483457	0.0875075	0.499271	9092	SART1	squamous cell carcinoma antigen recognized by T cells	0.757896	0.12039
351	Spliceosome	142	-0.0483457	0.0875075	0.499271	9128	PRPF4	PRP4 pre-mRNA processing factor 4 homolog (yeast)	0.446046	0.35062
351	Spliceosome	142	-0.0483457	0.0875075	0.499271	9129	PRPF3	PRP3 pre-mRNA processing factor 3 homolog (S. cerevisiae)	0.994833	-0.00224988
351	Spliceosome	142	-0.0483457	0.0875075	0.499271	9295	SRSF11	serine/arginine-rich splicing factor 11	0.0966165	1.01495
351	Spliceosome	142	-0.0483457	0.0875075	0.499271	9343	EFTUD2	elongation factor Tu GTP binding domain containing 2	0.175154	-0.75658
351	Spliceosome	142	-0.0483457	0.0875075	0.499271	9410	SNRNP40	small nuclear ribonucleoprotein 40kDa (U5)	0.639471	-0.194179
351	Spliceosome	142	-0.0483457	0.0875075	0.499271	9416	DDX23	DEAD (Asp-Glu-Ala-Asp) box polypeptide 23	0.287219	-0.541786
351	Spliceosome	142	-0.0483457	0.0875075	0.499271	9584	RBM39	RNA binding motif protein 39	0.414917	-0.382038
351	Spliceosome	142	-0.0483457	0.0875075	0.499271	9589	WTAP	Wilms tumor 1 associated protein	0.0819694	1.08635
351	Spliceosome	142	-0.0483457	0.0875075	0.499271	9716	AQR	aquarius homolog (mouse)	0.559126	-0.25249
351	Spliceosome	142	-0.0483457	0.0875075	0.499271	9775	EIF4A3	eukaryotic translation initiation factor 4A3	0.883155	-0.0539631
351	Spliceosome	142	-0.0483457	0.0875075	0.499271	9785	DHX38	DEAH (Asp-Glu-Ala-His) box polypeptide 38	0.368199	-0.433918
351	Spliceosome	142	-0.0483457	0.0875075	0.499271	9879	DDX46	DEAD (Asp-Glu-Ala-Asp) box polypeptide 46	0.23825	-0.622967
351	Spliceosome	142	-0.0483457	0.0875075	0.499271	9939	RBM8A	RNA binding motif protein 8A	0.23091	-0.636557
351	Spliceosome	142	-0.0483457	0.0875075	0.499271	9984	THOC1	THO complex 1	0.0610634	1.21422
351	Spliceosome	142	-0.0483457	0.0875075	0.499271	10189	THOC4	THO complex 4	0.662331	0.178925
351	Spliceosome	142	-0.0483457	0.0875075	0.499271	10250	SRRM1	serine/arginine repetitive matrix 1	0.0137072	-1.86305
351	Spliceosome	142	-0.0483457	0.0875075	0.499271	10262	SF3B4	splicing factor 3b, subunit 4, 49kDa	0.631917	-0.19934
351	Spliceosome	142	-0.0483457	0.0875075	0.499271	10285	SMNDC1	survival motor neuron domain containing 1	0.396654	0.401588
351	Spliceosome	142	-0.0483457	0.0875075	0.499271	10286	BCAS2	breast carcinoma amplified sequence 2	0.161983	-0.79053
351	Spliceosome	142	-0.0483457	0.0875075	0.499271	10291	SF3A1	splicing factor 3a, subunit 1, 120kDa	0.678002	-0.168769
351	Spliceosome	142	-0.0483457	0.0875075	0.499271	10421	CD2BP2	CD2 (cytoplasmic tail) binding protein 2	0.849981	0.0705906
351	Spliceosome	142	-0.0483457	0.0875075	0.499271	10450	PPIE	peptidylprolyl isomerase E (cyclophilin E)	0.333761	-0.476564
351	Spliceosome	142	-0.0483457	0.0875075	0.499271	10465	PPIH	peptidylprolyl isomerase H (cyclophilin H)	0.22068	-0.656238
351	Spliceosome	142	-0.0483457	0.0875075	0.499271	10521	DDX17	DEAD (Asp-Glu-Ala-Asp) box polypeptide 17	0.742275	-0.129435
351	Spliceosome	142	-0.0483457	0.0875075	0.499271	10569	SLU7	SLU7 splicing factor homolog (S. cerevisiae)	0.498334	-0.30248
351	Spliceosome	142	-0.0483457	0.0875075	0.499271	10594	PRPF8	PRP8 pre-mRNA processing factor 8 homolog (S. cerevisiae)	0.109687	-0.959844
351	Spliceosome	142	-0.0483457	0.0875075	0.499271	10643	IGF2BP3	insulin-like growth factor 2 mRNA binding protein 3	0.317562	0.498171
351	Spliceosome	142	-0.0483457	0.0875075	0.499271	10713	USP39	ubiquitin specific peptidase 39	0.888036	0.0515693
351	Spliceosome	142	-0.0483457	0.0875075	0.499271	10907	TXNL4A	thioredoxin-like 4A	0.703455	0.152764
351	Spliceosome	142	-0.0483457	0.0875075	0.499271	10915	TCERG1	transcription elongation regulator 1	0.1435	0.843149
351	Spliceosome	142	-0.0483457	0.0875075	0.499271	10921	RNPS1	RNA binding protein S1, serine-rich domain	0.787285	-0.103868
351	Spliceosome	142	-0.0483457	0.0875075	0.499271	10946	SF3A3	splicing factor 3a, subunit 3, 60kDa	0.0219067	-1.65942
351	Spliceosome	142	-0.0483457	0.0875075	0.499271	10992	SF3B2	splicing factor 3b, subunit 2, 145kDa	0.218616	-0.660317
351	Spliceosome	142	-0.0483457	0.0875075	0.499271	11017	SNRNP27	small nuclear ribonucleoprotein 27kDa (U4/U6.U5)	0.00996595	2.00148
351	Spliceosome	142	-0.0483457	0.0875075	0.499271	11051	NUDT21	nudix (nucleoside diphosphate linked moiety X)-type motif 21	0.98185	0.0079548
351	Spliceosome	142	-0.0483457	0.0875075	0.499271	11052	CPSF6	cleavage and polyadenylation specific factor 6, 68kDa	0.266253	0.574705
351	Spliceosome	142	-0.0483457	0.0875075	0.499271	11157	LSM6	LSM6 homolog, U6 small nuclear RNA associated (S. cerevisiae)	0.122611	0.91147
351	Spliceosome	142	-0.0483457	0.0875075	0.499271	11338	U2AF2	U2 small nuclear RNA auxiliary factor 2	0.224175	-0.649412
351	Spliceosome	142	-0.0483457	0.0875075	0.499271	22826	DNAJC8	DnaJ (Hsp40) homolog, subfamily C, member 8	0.14233	0.846705
351	Spliceosome	142	-0.0483457	0.0875075	0.499271	22827	PUF60	poly-U binding splicing factor 60KDa	0.00416868	-2.38
351	Spliceosome	142	-0.0483457	0.0875075	0.499271	22916	NCBP2	nuclear cap binding protein subunit 2, 20kDa	0.404705	0.392862
351	Spliceosome	142	-0.0483457	0.0875075	0.499271	22938	SNW1	SNW domain containing 1	0.396122	0.402171
351	Spliceosome	142	-0.0483457	0.0875075	0.499271	22985	ACIN1	apoptotic chromatin condensation inducer 1	0.547764	-0.261406
351	Spliceosome	142	-0.0483457	0.0875075	0.499271	23013	SPEN	spen homolog, transcriptional regulator (Drosophila)	0.749692	0.125117
351	Spliceosome	142	-0.0483457	0.0875075	0.499271	23020	SNRNP200	small nuclear ribonucleoprotein 200kDa (U5)	0.0904281	-1.0437
351	Spliceosome	142	-0.0483457	0.0875075	0.499271	23350	U2SURP	U2 snRNP-associated SURP domain containing	0.398639	0.39942
351	Spliceosome	142	-0.0483457	0.0875075	0.499271	23398	PPWD1	peptidylprolyl isomerase domain and WD repeat containing 1	0.0461604	-1.33573
351	Spliceosome	142	-0.0483457	0.0875075	0.499271	23450	SF3B3	splicing factor 3b, subunit 3, 130kDa	0.658181	-0.181655
351	Spliceosome	142	-0.0483457	0.0875075	0.499271	23451	SF3B1	splicing factor 3b, subunit 1, 155kDa	0.668036	-0.1752
351	Spliceosome	142	-0.0483457	0.0875075	0.499271	23517	SKIV2L2	superkiller viralicidic activity 2-like 2 (S. cerevisiae)	0.485639	0.313686
351	Spliceosome	142	-0.0483457	0.0875075	0.499271	23524	SRRM2	serine/arginine repetitive matrix 2	0.0642881	1.19187
351	Spliceosome	142	-0.0483457	0.0875075	0.499271	23759	PPIL2	peptidylprolyl isomerase (cyclophilin)-like 2	0.119955	-0.92098
351	Spliceosome	142	-0.0483457	0.0875075	0.499271	24144	TFIP11	tuftelin interacting protein 11	0.291379	-0.535542
351	Spliceosome	142	-0.0483457	0.0875075	0.499271	24148	PRPF6	PRP6 pre-mRNA processing factor 6 homolog (S. cerevisiae)	0.907452	0.0421761
351	Spliceosome	142	-0.0483457	0.0875075	0.499271	25804	LSM4	LSM4 homolog, U6 small nuclear RNA associated (S. cerevisiae)	0.561058	-0.250992
351	Spliceosome	142	-0.0483457	0.0875075	0.499271	25949	SYF2	SYF2 homolog, RNA splicing factor (S. cerevisiae)	0.262151	0.581448
351	Spliceosome	142	-0.0483457	0.0875075	0.499271	25962	KIAA1429	KIAA1429	0.666349	0.176298
351	Spliceosome	142	-0.0483457	0.0875075	0.499271	26121	PRPF31	PRP31 pre-mRNA processing factor 31 homolog (S. cerevisiae)	0.0294939	-1.53027
351	Spliceosome	142	-0.0483457	0.0875075	0.499271	26986	PABPC1	poly(A) binding protein, cytoplasmic 1	0.760009	0.119181
351	Spliceosome	142	-0.0483457	0.0875075	0.499271	27258	LSM3	LSM3 homolog, U6 small nuclear RNA associated (S. cerevisiae)	0.262115	0.581508
351	Spliceosome	142	-0.0483457	0.0875075	0.499271	27336	HTATSF1	HIV-1 Tat specific factor 1	0.986715	-0.00580848
351	Spliceosome	142	-0.0483457	0.0875075	0.499271	27339	PRPF19	PRP19/PSO4 pre-mRNA processing factor 19 homolog (S. cerevisiae)	0.353474	-0.451643
351	Spliceosome	142	-0.0483457	0.0875075	0.499271	29105	C16orf80	chromosome 16 open reading frame 80	0.266108	0.574942
351	Spliceosome	142	-0.0483457	0.0875075	0.499271	51340	CRNKL1	crooked neck pre-mRNA splicing factor-like 1 (Drosophila)	0.145769	0.836335
351	Spliceosome	142	-0.0483457	0.0875075	0.499271	51362	CDC40	cell division cycle 40 homolog (S. cerevisiae)	0.964989	0.0154776
351	Spliceosome	142	-0.0483457	0.0875075	0.499271	51428	DDX41	DEAD (Asp-Glu-Ala-Asp) box polypeptide 41	0.215043	-0.667474
351	Spliceosome	142	-0.0483457	0.0875075	0.499271	51503	CWC15	CWC15 spliceosome-associated protein homolog (S. cerevisiae)	0.348679	-0.457574
351	Spliceosome	142	-0.0483457	0.0875075	0.499271	51593	SRRT	serrate RNA effector molecule homolog (Arabidopsis)	0.820094	-0.0861364
351	Spliceosome	142	-0.0483457	0.0875075	0.499271	51639	SF3B14	splicing factor 3B, 14 kDa subunit	0.224175	0.649412
351	Spliceosome	142	-0.0483457	0.0875075	0.499271	51645	PPIL1	peptidylprolyl isomerase (cyclophilin)-like 1	0.729758	0.136821
351	Spliceosome	142	-0.0483457	0.0875075	0.499271	51690	LSM7	LSM7 homolog, U6 small nuclear RNA associated (S. cerevisiae)	0.223069	-0.65156
351	Spliceosome	142	-0.0483457	0.0875075	0.499271	51729	WBP11	WW domain binding protein 11	0.43891	-0.357625
351	Spliceosome	142	-0.0483457	0.0875075	0.499271	51747	LUC7L3	LUC7-like 3 (S. cerevisiae)	0.679056	-0.168094
351	Spliceosome	142	-0.0483457	0.0875075	0.499271	51755	CDK12	cyclin-dependent kinase 12	0.148918	0.827053
351	Spliceosome	142	-0.0483457	0.0875075	0.499271	53938	PPIL3	peptidylprolyl isomerase (cyclophilin)-like 3	0.895721	-0.0478274
351	Spliceosome	142	-0.0483457	0.0875075	0.499271	55234	SMU1	smu-1 suppressor of mec-8 and unc-52 homolog (C. elegans)	0.87187	0.0595482
351	Spliceosome	142	-0.0483457	0.0875075	0.499271	55660	PRPF40A	PRP40 pre-mRNA processing factor 40 homolog A (S. cerevisiae)	0.395016	-0.403385
351	Spliceosome	142	-0.0483457	0.0875075	0.499271	55696	RBM22	RNA binding motif protein 22	0.739013	0.131348
351	Spliceosome	142	-0.0483457	0.0875075	0.499271	56259	CTNNBL1	catenin, beta like 1	0.831495	-0.0801402
351	Spliceosome	142	-0.0483457	0.0875075	0.499271	56949	XAB2	XPA binding protein 2	0.894981	-0.0481864
351	Spliceosome	142	-0.0483457	0.0875075	0.499271	57187	THOC2	THO complex 2	0.660186	-0.180334
351	Spliceosome	142	-0.0483457	0.0875075	0.499271	57461	ISY1	ISY1 splicing factor homolog (S. cerevisiae)	0.992536	0.00325356
351	Spliceosome	142	-0.0483457	0.0875075	0.499271	57703	CWC22	CWC22 spliceosome-associated protein homolog (S. cerevisiae)	0.032647	1.48616
351	Spliceosome	142	-0.0483457	0.0875075	0.499271	57819	LSM2	LSM2 homolog, U6 small nuclear RNA associated (S. cerevisiae)	0.656744	0.182604
351	Spliceosome	142	-0.0483457	0.0875075	0.499271	58509	C19orf29	chromosome 19 open reading frame 29	0.125277	-0.90213
351	Spliceosome	142	-0.0483457	0.0875075	0.499271	58517	RBM25	RNA binding motif protein 25	0.9089	-0.041484
351	Spliceosome	142	-0.0483457	0.0875075	0.499271	64783	RBM15	RNA binding motif protein 15	0.995304	0.00204446
351	Spliceosome	142	-0.0483457	0.0875075	0.499271	79002	C19orf43	chromosome 19 open reading frame 43	0.236754	-0.625703
351	Spliceosome	142	-0.0483457	0.0875075	0.499271	79228	THOC6	THO complex 6 homolog (Drosophila)	0.063988	-1.1939
351	Spliceosome	142	-0.0483457	0.0875075	0.499271	80145	THOC7	THO complex 7 homolog (Drosophila)	0.134831	-0.870211
351	Spliceosome	142	-0.0483457	0.0875075	0.499271	84321	THOC3	THO complex 3	0.323169	-0.490571
351	Spliceosome	142	-0.0483457	0.0875075	0.499271	84811	BUD13	BUD13 homolog (S. cerevisiae)	0.349424	0.456647
351	Spliceosome	142	-0.0483457	0.0875075	0.499271	84991	RBM17	RNA binding motif protein 17	0.678002	-0.168769
351	Spliceosome	142	-0.0483457	0.0875075	0.499271	94104	GCFC1	GC-rich sequence DNA-binding factor 1	0.291708	0.535052
314	PCNA-p21 complex	2	0.844717	0.0879573	0.499271	1026	CDKN1A	cyclin-dependent kinase inhibitor 1A (p21, Cip1)	0.0041739	2.37946
314	PCNA-p21 complex	2	0.844717	0.0879573	0.499271	5111	PCNA	proliferating cell nuclear antigen	0.204163	-0.690023
5401	PLEKHM2-KIF5B complex	2	-0.752005	0.0886837	0.499271	3799	KIF5B	kinesin family member 5B	0.629641	0.200907
5401	PLEKHM2-KIF5B complex	2	-0.752005	0.0886837	0.499271	23207	PLEKHM2	pleckstrin homology domain containing, family M (with RUN domain) member 2	0.019728	-1.70492
1120	Chromosomal passenger complex CPC (INCENP, CDCA8, BIRC5)	3	0.700191	0.0894206	0.499271	332	BIRC5	baculoviral IAP repeat containing 5	0.305328	0.515234
1120	Chromosomal passenger complex CPC (INCENP, CDCA8, BIRC5)	3	0.700191	0.0894206	0.499271	3619	INCENP	inner centromere protein antigens 135/155kDa	0.0565064	1.2479
1120	Chromosomal passenger complex CPC (INCENP, CDCA8, BIRC5)	3	0.700191	0.0894206	0.499271	55143	CDCA8	cell division cycle associated 8	0.459793	0.337438
2693	NFAT-JUN-FOS DNA-protein complex	3	-0.61837	0.0895113	0.499271	2353	FOS	FBJ murine osteosarcoma viral oncogene homolog	0.670488	-0.173609
2693	NFAT-JUN-FOS DNA-protein complex	3	-0.61837	0.0895113	0.499271	3725	JUN	jun proto-oncogene	0.153762	-0.813152
2693	NFAT-JUN-FOS DNA-protein complex	3	-0.61837	0.0895113	0.499271	4773	NFATC2	nuclear factor of activated T-cells, cytoplasmic, calcineurin-dependent 2	0.13541	-0.868349
959	LLGL1-PAR-6B-PRKCI complex	3	-0.612737	0.0913831	0.499271	3996	LLGL1	lethal giant larvae homolog 1 (Drosophila)	0.84974	-0.0707137
959	LLGL1-PAR-6B-PRKCI complex	3	-0.612737	0.0913831	0.499271	5584	PRKCI	protein kinase C, iota	0.690116	0.161078
959	LLGL1-PAR-6B-PRKCI complex	3	-0.612737	0.0913831	0.499271	84612	PARD6B	par-6 partitioning defective 6 homolog beta (C. elegans)	0.0117876	-1.92857
2890	Notch1-fraction 30 complex	3	-0.610063	0.0922817	0.499271	3516	RBPJ	recombination signal binding protein for immunoglobulin kappa J region	0.573554	-0.241426
2890	Notch1-fraction 30 complex	3	-0.610063	0.0922817	0.499271	4851	NOTCH1	notch 1	0.0852762	-1.06917
2890	Notch1-fraction 30 complex	3	-0.610063	0.0922817	0.499271	9794	MAML1	mastermind-like 1 (Drosophila)	0.30228	-0.519591
2897	RBPJ-NotchIC-Mastermind complex	3	-0.610063	0.0922817	0.499271	3516	RBPJ	recombination signal binding protein for immunoglobulin kappa J region	0.573554	-0.241426
2897	RBPJ-NotchIC-Mastermind complex	3	-0.610063	0.0922817	0.499271	4851	NOTCH1	notch 1	0.0852762	-1.06917
2897	RBPJ-NotchIC-Mastermind complex	3	-0.610063	0.0922817	0.499271	9794	MAML1	mastermind-like 1 (Drosophila)	0.30228	-0.519591
3113	MAML1-RBP-Jkappa-Notch1 complex	3	-0.610063	0.0922817	0.499271	3516	RBPJ	recombination signal binding protein for immunoglobulin kappa J region	0.573554	-0.241426
3113	MAML1-RBP-Jkappa-Notch1 complex	3	-0.610063	0.0922817	0.499271	4851	NOTCH1	notch 1	0.0852762	-1.06917
3113	MAML1-RBP-Jkappa-Notch1 complex	3	-0.610063	0.0922817	0.499271	9794	MAML1	mastermind-like 1 (Drosophila)	0.30228	-0.519591
284	CRSP complex	11	-0.290455	0.0924991	0.499271	5469	MED1	mediator complex subunit 1	0.0914742	-1.0387
284	CRSP complex	11	-0.290455	0.0924991	0.499271	9282	MED14	mediator complex subunit 14	0.961751	0.0169375
284	CRSP complex	11	-0.290455	0.0924991	0.499271	9412	MED21	mediator complex subunit 21	0.329244	0.482482
284	CRSP complex	11	-0.290455	0.0924991	0.499271	9439	MED23	mediator complex subunit 23	0.3559	0.448672
284	CRSP complex	11	-0.290455	0.0924991	0.499271	9440	MED17	mediator complex subunit 17	0.430739	-0.365786
284	CRSP complex	11	-0.290455	0.0924991	0.499271	9441	MED26	mediator complex subunit 26	0.105132	-0.978266
284	CRSP complex	11	-0.290455	0.0924991	0.499271	9443	MED7	mediator complex subunit 7	0.144289	0.840767
284	CRSP complex	11	-0.290455	0.0924991	0.499271	9862	MED24	mediator complex subunit 24	0.0126048	-1.89946
284	CRSP complex	11	-0.290455	0.0924991	0.499271	10001	MED6	mediator complex subunit 6	0.104669	-0.980181
284	CRSP complex	11	-0.290455	0.0924991	0.499271	51586	MED15	mediator complex subunit 15	0.898729	-0.0463713
284	CRSP complex	11	-0.290455	0.0924991	0.499271	81857	MED25	mediator complex subunit 25	0.473261	0.3249
3138	POSH-AKT2 complex	2	-0.73673	0.0929088	0.499271	208	AKT2	v-akt murine thymoma viral oncogene homolog 2	0.980011	-0.00876891
3138	POSH-AKT2 complex	2	-0.73673	0.0929088	0.499271	57630	SH3RF1	SH3 domain containing ring finger 1	0.0343011	-1.46469
527	TRPC3-TRPC4 channel complex, redox-sensitive	2	-0.735823	0.0931644	0.499271	7222	TRPC3	transient receptor potential cation channel, subfamily C, member 3	0.101985	-0.991465
527	TRPC3-TRPC4 channel complex, redox-sensitive	2	-0.735823	0.0931644	0.499271	7223	TRPC4	transient receptor potential cation channel, subfamily C, member 4	0.330993	-0.480181
1153	Integrator complex	12	0.361034	0.0939486	0.499271	25896	INTS7	integrator complex subunit 7	0.925991	-0.033393
1153	Integrator complex	12	0.361034	0.0939486	0.499271	26173	INTS1	integrator complex subunit 1	0.337452	0.471788
1153	Integrator complex	12	0.361034	0.0939486	0.499271	26512	INTS6	integrator complex subunit 6	0.179139	0.746809
1153	Integrator complex	12	0.361034	0.0939486	0.499271	54973	CPSF3L	cleavage and polyadenylation specific factor 3-like	0.792908	-0.100777
1153	Integrator complex	12	0.361034	0.0939486	0.499271	55174	INTS10	integrator complex subunit 10	0.0165424	1.7814
1153	Integrator complex	12	0.361034	0.0939486	0.499271	55656	INTS8	integrator complex subunit 8	0.245779	0.609456
1153	Integrator complex	12	0.361034	0.0939486	0.499271	55756	INTS9	integrator complex subunit 9	0.954958	-0.0200159
1153	Integrator complex	12	0.361034	0.0939486	0.499271	57117	INTS12	integrator complex subunit 12	0.475427	-0.322916
1153	Integrator complex	12	0.361034	0.0939486	0.499271	57508	INTS2	integrator complex subunit 2	0.922614	0.03498
1153	Integrator complex	12	0.361034	0.0939486	0.499271	65123	INTS3	integrator complex subunit 3	0.96504	0.0154546
1153	Integrator complex	12	0.361034	0.0939486	0.499271	80789	INTS5	integrator complex subunit 5	0.137335	0.862218
1153	Integrator complex	12	0.361034	0.0939486	0.499271	92105	INTS4	integrator complex subunit 4	0.515935	0.287405
2961	SLP-76-PLC-gamma-1-VAV complex, alpha-TCR stimulated	3	0.685036	0.0945183	0.499271	3937	LCP2	lymphocyte cytosolic protein 2 (SH2 domain containing leukocyte protein of 76kDa)	0.123834	0.907161
2961	SLP-76-PLC-gamma-1-VAV complex, alpha-TCR stimulated	3	0.685036	0.0945183	0.499271	5335	PLCG1	phospholipase C, gamma 1	0.1113	0.953506
2961	SLP-76-PLC-gamma-1-VAV complex, alpha-TCR stimulated	3	0.685036	0.0945183	0.499271	7409	VAV1	vav 1 guanine nucleotide exchange factor	0.639088	0.19444
2731	Set1A complex	6	-0.402775	0.094967	0.499271	5929	RBBP5	retinoblastoma binding protein 5	0.861264	-0.0648636
2731	Set1A complex	6	-0.402775	0.094967	0.499271	9070	ASH2L	ash2 (absent, small, or homeotic)-like (Drosophila)	0.419159	-0.377621
2731	Set1A complex	6	-0.402775	0.094967	0.499271	9739	SETD1A	SET domain containing 1A	0.19601	-0.707723
2731	Set1A complex	6	-0.402775	0.094967	0.499271	11091	WDR5	WD repeat domain 5	0.0233649	-1.63144
2731	Set1A complex	6	-0.402775	0.094967	0.499271	80335	WDR82	WD repeat domain 82	0.647197	-0.188964
2731	Set1A complex	6	-0.402775	0.094967	0.499271	219771	CCNY	cyclin Y	0.279282	0.553957
4089	SMAD6-HOXC8 complex	2	0.819068	0.0950924	0.499271	3224	HOXC8	homeobox C8	0.288525	0.539817
4089	SMAD6-HOXC8 complex	2	0.819068	0.0950924	0.499271	4091	SMAD6	SMAD family member 6	0.0797407	1.09832
2960	SLP-76-PLC-gamma-1-ITK complex, alpha-TCR stimulated	3	0.683342	0.0951009	0.499271	3702	ITK	IL2-inducible T-cell kinase	0.646607	0.18936
2960	SLP-76-PLC-gamma-1-ITK complex, alpha-TCR stimulated	3	0.683342	0.0951009	0.499271	3937	LCP2	lymphocyte cytosolic protein 2 (SH2 domain containing leukocyte protein of 76kDa)	0.123834	0.907161
2960	SLP-76-PLC-gamma-1-ITK complex, alpha-TCR stimulated	3	0.683342	0.0951009	0.499271	5335	PLCG1	phospholipase C, gamma 1	0.1113	0.953506
721	PU.1-TBP complex	2	-0.728301	0.0953033	0.499271	6688	SPI1	spleen focus forming virus (SFFV) proviral integration oncogene spi1	0.0941702	-1.02609
721	PU.1-TBP complex	2	-0.728301	0.0953033	0.499271	6908	TBP	TATA box binding protein	0.371095	-0.430514
714	BRM-SIN3A complex	15	-0.233728	0.0955676	0.499271	86	ACTL6A	actin-like 6A	0.721185	0.141954
714	BRM-SIN3A complex	15	-0.233728	0.0955676	0.499271	3065	HDAC1	histone deacetylase 1	0.729001	-0.137272
714	BRM-SIN3A complex	15	-0.233728	0.0955676	0.499271	3066	HDAC2	histone deacetylase 2	0.510678	-0.291853
714	BRM-SIN3A complex	15	-0.233728	0.0955676	0.499271	5928	RBBP4	retinoblastoma binding protein 4	0.213744	-0.670107
714	BRM-SIN3A complex	15	-0.233728	0.0955676	0.499271	6595	SMARCA2	SWI/SNF related, matrix associated, actin dependent regulator of chromatin, subfamily a, member 2	0.865452	0.0627572
714	BRM-SIN3A complex	15	-0.233728	0.0955676	0.499271	6598	SMARCB1	SWI/SNF related, matrix associated, actin dependent regulator of chromatin, subfamily b, member 1	0.698804	0.155644
714	BRM-SIN3A complex	15	-0.233728	0.0955676	0.499271	6599	SMARCC1	SWI/SNF related, matrix associated, actin dependent regulator of chromatin, subfamily c, member 1	0.250072	0.601934
714	BRM-SIN3A complex	15	-0.233728	0.0955676	0.499271	6601	SMARCC2	SWI/SNF related, matrix associated, actin dependent regulator of chromatin, subfamily c, member 2	0.227317	0.643368
714	BRM-SIN3A complex	15	-0.233728	0.0955676	0.499271	6602	SMARCD1	SWI/SNF related, matrix associated, actin dependent regulator of chromatin, subfamily d, member 1	0.00628236	-2.20188
714	BRM-SIN3A complex	15	-0.233728	0.0955676	0.499271	6603	SMARCD2	SWI/SNF related, matrix associated, actin dependent regulator of chromatin, subfamily d, member 2	0.961751	-0.0169375
714	BRM-SIN3A complex	15	-0.233728	0.0955676	0.499271	6604	SMARCD3	SWI/SNF related, matrix associated, actin dependent regulator of chromatin, subfamily d, member 3	0.268465	-0.571113
714	BRM-SIN3A complex	15	-0.233728	0.0955676	0.499271	6605	SMARCE1	SWI/SNF related, matrix associated, actin dependent regulator of chromatin, subfamily e, member 1	0.831217	0.0802856
714	BRM-SIN3A complex	15	-0.233728	0.0955676	0.499271	8289	ARID1A	AT rich interactive domain 1A (SWI-like)	0.55951	-0.252192
714	BRM-SIN3A complex	15	-0.233728	0.0955676	0.499271	10419	PRMT5	protein arginine methyltransferase 5	0.123065	-0.909865
714	BRM-SIN3A complex	15	-0.233728	0.0955676	0.499271	25942	SIN3A	SIN3 homolog A, transcription regulator (yeast)	0.723352	-0.14065
5193	TNF-alpha/NF-kappa B signaling complex (CHUK, KPNA3, NFKB2, NFKBIB, REL, IKBKG, NFKB1, NFKBIE, RELB, NFKBIA, RELA, TNIP2)	12	-0.267231	0.096211	0.499271	1147	CHUK	conserved helix-loop-helix ubiquitous kinase	0.315969	0.500355
5193	TNF-alpha/NF-kappa B signaling complex (CHUK, KPNA3, NFKB2, NFKBIB, REL, IKBKG, NFKB1, NFKBIE, RELB, NFKBIA, RELA, TNIP2)	12	-0.267231	0.096211	0.499271	3839	KPNA3	karyopherin alpha 3 (importin alpha 4)	0.49745	-0.30325
5193	TNF-alpha/NF-kappa B signaling complex (CHUK, KPNA3, NFKB2, NFKBIB, REL, IKBKG, NFKB1, NFKBIE, RELB, NFKBIA, RELA, TNIP2)	12	-0.267231	0.096211	0.499271	4790	NFKB1	nuclear factor of kappa light polypeptide gene enhancer in B-cells 1	0.632905	-0.198661
5193	TNF-alpha/NF-kappa B signaling complex (CHUK, KPNA3, NFKB2, NFKBIB, REL, IKBKG, NFKB1, NFKBIE, RELB, NFKBIA, RELA, TNIP2)	12	-0.267231	0.096211	0.499271	4791	NFKB2	nuclear factor of kappa light polypeptide gene enhancer in B-cells 2 (p49/p100)	0.0254954	-1.59354
5193	TNF-alpha/NF-kappa B signaling complex (CHUK, KPNA3, NFKB2, NFKBIB, REL, IKBKG, NFKB1, NFKBIE, RELB, NFKBIA, RELA, TNIP2)	12	-0.267231	0.096211	0.499271	4792	NFKBIA	nuclear factor of kappa light polypeptide gene enhancer in B-cells inhibitor, alpha	0.719547	0.142941
5193	TNF-alpha/NF-kappa B signaling complex (CHUK, KPNA3, NFKB2, NFKBIB, REL, IKBKG, NFKB1, NFKBIE, RELB, NFKBIA, RELA, TNIP2)	12	-0.267231	0.096211	0.499271	4793	NFKBIB	nuclear factor of kappa light polypeptide gene enhancer in B-cells inhibitor, beta	0.73989	-0.130833
5193	TNF-alpha/NF-kappa B signaling complex (CHUK, KPNA3, NFKB2, NFKBIB, REL, IKBKG, NFKB1, NFKBIE, RELB, NFKBIA, RELA, TNIP2)	12	-0.267231	0.096211	0.499271	4794	NFKBIE	nuclear factor of kappa light polypeptide gene enhancer in B-cells inhibitor, epsilon	0.230922	-0.636535
5193	TNF-alpha/NF-kappa B signaling complex (CHUK, KPNA3, NFKB2, NFKBIB, REL, IKBKG, NFKB1, NFKBIE, RELB, NFKBIA, RELA, TNIP2)	12	-0.267231	0.096211	0.499271	5966	REL	v-rel reticuloendotheliosis viral oncogene homolog (avian)	0.438354	0.358175
5193	TNF-alpha/NF-kappa B signaling complex (CHUK, KPNA3, NFKB2, NFKBIB, REL, IKBKG, NFKB1, NFKBIE, RELB, NFKBIA, RELA, TNIP2)	12	-0.267231	0.096211	0.499271	5970	RELA	v-rel reticuloendotheliosis viral oncogene homolog A (avian)	0.613346	-0.212295
5193	TNF-alpha/NF-kappa B signaling complex (CHUK, KPNA3, NFKB2, NFKBIB, REL, IKBKG, NFKB1, NFKBIE, RELB, NFKBIA, RELA, TNIP2)	12	-0.267231	0.096211	0.499271	5971	RELB	v-rel reticuloendotheliosis viral oncogene homolog B	0.121221	-0.916421
5193	TNF-alpha/NF-kappa B signaling complex (CHUK, KPNA3, NFKB2, NFKBIB, REL, IKBKG, NFKB1, NFKBIE, RELB, NFKBIA, RELA, TNIP2)	12	-0.267231	0.096211	0.499271	8517	IKBKG	inhibitor of kappa light polypeptide gene enhancer in B-cells, kinase gamma	0.508047	-0.294096
5193	TNF-alpha/NF-kappa B signaling complex (CHUK, KPNA3, NFKB2, NFKBIB, REL, IKBKG, NFKB1, NFKBIE, RELB, NFKBIA, RELA, TNIP2)	12	-0.267231	0.096211	0.499271	79155	TNIP2	TNFAIP3 interacting protein 2	0.836784	0.0773865
934	FACT-NEK9 complex	3	0.677022	0.0972987	0.499271	6749	SSRP1	structure specific recognition protein 1	0.683953	-0.164974
934	FACT-NEK9 complex	3	0.677022	0.0972987	0.499271	11198	SUPT16H	suppressor of Ty 16 homolog (S. cerevisiae)	0.476255	0.32216
934	FACT-NEK9 complex	3	0.677022	0.0972987	0.499271	91754	NEK9	NIMA (never in mitosis gene a)- related kinase 9	0.0133696	1.87388
1194	E2F-6 complex	12	-0.265584	0.0973883	0.499271	1876	E2F6	E2F transcription factor 6	0.93896	0.0273529
1194	E2F-6 complex	12	-0.265584	0.0973883	0.499271	2707	GJB3	gap junction protein, beta 3, 31kDa	0.0964927	-1.01551
1194	E2F-6 complex	12	-0.265584	0.0973883	0.499271	4149	MAX	MYC associated factor X	0.770433	-0.113265
1194	E2F-6 complex	12	-0.265584	0.0973883	0.499271	6015	RING1	ring finger protein 1	0.392639	0.406007
1194	E2F-6 complex	12	-0.265584	0.0973883	0.499271	6045	RNF2	ring finger protein 2	0.684388	-0.164698
1194	E2F-6 complex	12	-0.265584	0.0973883	0.499271	7027	TFDP1	transcription factor Dp-1	0.284702	-0.54561
1194	E2F-6 complex	12	-0.265584	0.0973883	0.499271	10138	YAF2	YY1 associated factor 2	0.0566725	-1.24663
1194	E2F-6 complex	12	-0.265584	0.0973883	0.499271	10919	EHMT2	euchromatic histone-lysine N-methyltransferase 2	0.20568	-0.686807
1194	E2F-6 complex	12	-0.265584	0.0973883	0.499271	23269	MGA	MAX gene associated	0.274997	0.560673
1194	E2F-6 complex	12	-0.265584	0.0973883	0.499271	79813	EHMT1	euchromatic histone-lysine N-methyltransferase 1	0.738348	-0.131739
1194	E2F-6 complex	12	-0.265584	0.0973883	0.499271	83746	L3MBTL2	l(3)mbt-like 2 (Drosophila)	0.205699	-0.686768
1194	E2F-6 complex	12	-0.265584	0.0973883	0.499271	84108	PCGF6	polycomb group ring finger 6	0.38906	0.409983
2707	SMAD3-SMAD4-FOXO3-FOXG1 complex	4	0.585701	0.0974025	0.499271	2290	FOXG1	forkhead box G1	0.139408	0.855713
2707	SMAD3-SMAD4-FOXO3-FOXG1 complex	4	0.585701	0.0974025	0.499271	2309	FOXO3	forkhead box O3	0.0507092	1.29491
2707	SMAD3-SMAD4-FOXO3-FOXG1 complex	4	0.585701	0.0974025	0.499271	4088	SMAD3	SMAD family member 3	0.127377	-0.894907
2707	SMAD3-SMAD4-FOXO3-FOXG1 complex	4	0.585701	0.0974025	0.499271	4089	SMAD4	SMAD family member 4	0.0818302	1.08709
3086	CCND3-CDK4 complex	2	0.811027	0.0974149	0.499271	896	CCND3	cyclin D3	0.0610609	1.21424
3086	CCND3-CDK4 complex	2	0.811027	0.0974149	0.499271	1019	CDK4	cyclin-dependent kinase 4	0.391005	0.407817
2159	AR-AKT-APPL complex	3	0.67411	0.0983241	0.499271	207	AKT1	v-akt murine thymoma viral oncogene homolog 1	0.21737	0.6628
2159	AR-AKT-APPL complex	3	0.67411	0.0983241	0.499271	367	AR	androgen receptor	0.0996604	-1.00148
2159	AR-AKT-APPL complex	3	0.67411	0.0983241	0.499271	26060	APPL1	adaptor protein, phosphotyrosine interaction, PH domain and leucine zipper containing 1	0.00435505	2.36101
1183	CDC5L complex	30	-0.151242	0.0985139	0.499271	988	CDC5L	CDC5 cell division cycle 5-like (S. pombe)	0.613969	0.211853
1183	CDC5L complex	30	-0.151242	0.0985139	0.499271	1778	DYNC1H1	dynein, cytoplasmic 1, heavy chain 1	0.289254	-0.538721
1183	CDC5L complex	30	-0.151242	0.0985139	0.499271	3312	HSPA8	heat shock 70kDa protein 8	0.0788937	-1.10296
1183	CDC5L complex	30	-0.151242	0.0985139	0.499271	3608	ILF2	interleukin enhancer binding factor 2, 45kDa	0.432841	-0.363671
1183	CDC5L complex	30	-0.151242	0.0985139	0.499271	5356	PLRG1	pleiotropic regulator 1 (PRL1 homolog, Arabidopsis)	0.696304	0.157201
1183	CDC5L complex	30	-0.151242	0.0985139	0.499271	5499	PPP1CA	protein phosphatase 1, catalytic subunit, alpha isozyme	0.0550905	1.25892
1183	CDC5L complex	30	-0.151242	0.0985139	0.499271	5591	PRKDC	protein kinase, DNA-activated, catalytic polypeptide	0.396892	-0.401328
1183	CDC5L complex	30	-0.151242	0.0985139	0.499271	6421	SFPQ	splicing factor proline/glutamine-rich	0.529884	0.275819
1183	CDC5L complex	30	-0.151242	0.0985139	0.499271	6426	SRSF1	serine/arginine-rich splicing factor 1	0.855992	-0.0675302
1183	CDC5L complex	30	-0.151242	0.0985139	0.499271	6427	SRSF2	serine/arginine-rich splicing factor 2	0.577324	0.23858
1183	CDC5L complex	30	-0.151242	0.0985139	0.499271	6626	SNRPA	small nuclear ribonucleoprotein polypeptide A	0.902071	-0.0447595
1183	CDC5L complex	30	-0.151242	0.0985139	0.499271	6627	SNRPA1	small nuclear ribonucleoprotein polypeptide A'	0.720653	-0.142274
1183	CDC5L complex	30	-0.151242	0.0985139	0.499271	6632	SNRPD1	small nuclear ribonucleoprotein D1 polypeptide 16kDa	0.844264	0.0735217
1183	CDC5L complex	30	-0.151242	0.0985139	0.499271	6633	SNRPD2	small nuclear ribonucleoprotein D2 polypeptide 16.5kDa	0.661412	0.179528
1183	CDC5L complex	30	-0.151242	0.0985139	0.499271	6634	SNRPD3	small nuclear ribonucleoprotein D3 polypeptide 18kDa	0.0900493	-1.04552
1183	CDC5L complex	30	-0.151242	0.0985139	0.499271	6925	TCF4	transcription factor 4	0.635361	0.19698
1183	CDC5L complex	30	-0.151242	0.0985139	0.499271	7153	TOP2A	topoisomerase (DNA) II alpha 170kDa	0.467902	0.329845
1183	CDC5L complex	30	-0.151242	0.0985139	0.499271	8493	PPM1D	protein phosphatase, Mg2+/Mn2+ dependent, 1D	0.503601	0.297913
1183	CDC5L complex	30	-0.151242	0.0985139	0.499271	9689	BZW1	basic leucine zipper and W2 domains 1	0.34036	0.468061
1183	CDC5L complex	30	-0.151242	0.0985139	0.499271	9814	SFI1	Sfi1 homolog, spindle assembly associated (yeast)	0.711616	0.147754
1183	CDC5L complex	30	-0.151242	0.0985139	0.499271	10250	SRRM1	serine/arginine repetitive matrix 1	0.0137072	-1.86305
1183	CDC5L complex	30	-0.151242	0.0985139	0.499271	10262	SF3B4	splicing factor 3b, subunit 4, 49kDa	0.631917	-0.19934
1183	CDC5L complex	30	-0.151242	0.0985139	0.499271	10286	BCAS2	breast carcinoma amplified sequence 2	0.161983	-0.79053
1183	CDC5L complex	30	-0.151242	0.0985139	0.499271	10985	GCN1L1	GCN1 general control of amino-acid synthesis 1-like 1 (yeast)	0.582833	-0.234456
1183	CDC5L complex	30	-0.151242	0.0985139	0.499271	10992	SF3B2	splicing factor 3b, subunit 2, 145kDa	0.218616	-0.660317
1183	CDC5L complex	30	-0.151242	0.0985139	0.499271	22828	SCAF8	SR-related CTD-associated factor 8	0.36497	0.437743
1183	CDC5L complex	30	-0.151242	0.0985139	0.499271	23451	SF3B1	splicing factor 3b, subunit 1, 155kDa	0.668036	-0.1752
1183	CDC5L complex	30	-0.151242	0.0985139	0.499271	27316	RBMX	RNA binding motif protein, X-linked	0.534439	-0.272102
1183	CDC5L complex	30	-0.151242	0.0985139	0.499271	27339	PRPF19	PRP19/PSO4 pre-mRNA processing factor 19 homolog (S. cerevisiae)	0.353474	-0.451643
1183	CDC5L complex	30	-0.151242	0.0985139	0.499271	51503	CWC15	CWC15 spliceosome-associated protein homolog (S. cerevisiae)	0.348679	-0.457574
2879	CD20-LCK-FYN-p75/80 complex	3	0.673008	0.0987139	0.499271	931	MS4A1	membrane-spanning 4-domains, subfamily A, member 1	0.00227704	2.64263
2879	CD20-LCK-FYN-p75/80 complex	3	0.673008	0.0987139	0.499271	2534	FYN	FYN oncogene related to SRC, FGR, YES	0.58412	0.233498
2879	CD20-LCK-FYN-p75/80 complex	3	0.673008	0.0987139	0.499271	3932	LCK	lymphocyte-specific protein tyrosine kinase	0.138963	-0.857102
2678	FOXO3-TP53 complex, oxidative stress stimulated	2	0.805265	0.0991046	0.499271	2309	FOXO3	forkhead box O3	0.0507092	1.29491
2678	FOXO3-TP53 complex, oxidative stress stimulated	2	0.805265	0.0991046	0.499271	7157	TP53	tumor protein p53	0.483486	0.315616
2418	ITGA4-ITGB1 complex	2	-0.71302	0.099759	0.499271	3676	ITGA4	integrin, alpha 4 (antigen CD49D, alpha 4 subunit of VLA-4 receptor)	0.0576718	-1.23904
2418	ITGA4-ITGB1 complex	2	-0.71302	0.099759	0.499271	3688	ITGB1	integrin, beta 1 (fibronectin receptor, beta polypeptide, antigen CD29 includes MDF2, MSK12)	0.650123	-0.187004
2396	ITGA7-ITGB1-CD9 complex	3	-0.588079	0.0999184	0.499271	928	CD9	CD9 molecule	0.797912	-0.0980447
2396	ITGA7-ITGB1-CD9 complex	3	-0.588079	0.0999184	0.499271	3679	ITGA7	integrin, alpha 7	0.0331751	-1.47919
2396	ITGA7-ITGB1-CD9 complex	3	-0.588079	0.0999184	0.499271	3688	ITGB1	integrin, beta 1 (fibronectin receptor, beta polypeptide, antigen CD29 includes MDF2, MSK12)	0.650123	-0.187004
220	ARF-Mule complex	3	0.66946	0.0999775	0.499271	1029	CDKN2A	cyclin-dependent kinase inhibitor 2A (melanoma, p16, inhibits CDK4)	0.873786	-0.0585948
220	ARF-Mule complex	3	0.66946	0.0999775	0.499271	4869	NPM1	nucleophosmin (nucleolar phosphoprotein B23, numatrin)	0.899865	-0.0458226
220	ARF-Mule complex	3	0.66946	0.0999775	0.499271	10075	HUWE1	HECT, UBA and WWE domain containing 1	0.00771265	2.1128
1473	E2F5-RB2-DP1 complex	3	0.669265	0.100047	0.499271	1875	E2F5	E2F transcription factor 5, p130-binding	0.00173454	2.76082
1473	E2F5-RB2-DP1 complex	3	0.669265	0.100047	0.499271	5934	RBL2	retinoblastoma-like 2 (p130)	0.620281	-0.207411
1473	E2F5-RB2-DP1 complex	3	0.669265	0.100047	0.499271	7027	TFDP1	transcription factor Dp-1	0.284702	-0.54561
877	SNARE complex (VAMP4, STX6, STX16, VTI1a, VTI1b)	5	0.52848	0.100214	0.499271	8674	VAMP4	vesicle-associated membrane protein 4	0.927398	0.0327337
877	SNARE complex (VAMP4, STX6, STX16, VTI1a, VTI1b)	5	0.52848	0.100214	0.499271	8675	STX16	syntaxin 16	0.160001	0.795878
877	SNARE complex (VAMP4, STX6, STX16, VTI1a, VTI1b)	5	0.52848	0.100214	0.499271	10228	STX6	syntaxin 6	0.0650035	1.18706
877	SNARE complex (VAMP4, STX6, STX16, VTI1a, VTI1b)	5	0.52848	0.100214	0.499271	10490	VTI1B	vesicle transport through interaction with t-SNAREs homolog 1B (yeast)	0.2174	0.66274
877	SNARE complex (VAMP4, STX6, STX16, VTI1a, VTI1b)	5	0.52848	0.100214	0.499271	143187	VTI1A	vesicle transport through interaction with t-SNAREs homolog 1A (yeast)	0.920416	-0.0360159
817	MRIP-MBS complex	2	-0.710559	0.100491	0.499271	4659	PPP1R12A	protein phosphatase 1, regulatory (inhibitor) subunit 12A	0.783952	0.105711
817	MRIP-MBS complex	2	-0.710559	0.100491	0.499271	23164	MPRIP	myosin phosphatase Rho interacting protein	0.0297284	-1.52683
445	TFTC complex (TATA-binding protein-free TAF-II-containing complex)	16	-0.220157	0.101019	0.499271	2648	KAT2A	K(lysine) acetyltransferase 2A	0.75761	-0.120554
445	TFTC complex (TATA-binding protein-free TAF-II-containing complex)	16	-0.220157	0.101019	0.499271	6314	ATXN7	ataxin 7	0.265434	-0.576044
445	TFTC complex (TATA-binding protein-free TAF-II-containing complex)	16	-0.220157	0.101019	0.499271	6873	TAF2	TAF2 RNA polymerase II, TATA box binding protein (TBP)-associated factor, 150kDa	0.142045	-0.847573
445	TFTC complex (TATA-binding protein-free TAF-II-containing complex)	16	-0.220157	0.101019	0.499271	6874	TAF4	TAF4 RNA polymerase II, TATA box binding protein (TBP)-associated factor, 135kDa	0.645657	0.189998
445	TFTC complex (TATA-binding protein-free TAF-II-containing complex)	16	-0.220157	0.101019	0.499271	6877	TAF5	TAF5 RNA polymerase II, TATA box binding protein (TBP)-associated factor, 100kDa	0.874783	0.0580994
445	TFTC complex (TATA-binding protein-free TAF-II-containing complex)	16	-0.220157	0.101019	0.499271	6878	TAF6	TAF6 RNA polymerase II, TATA box binding protein (TBP)-associated factor, 80kDa	0.226988	-0.643998
445	TFTC complex (TATA-binding protein-free TAF-II-containing complex)	16	-0.220157	0.101019	0.499271	6879	TAF7	TAF7 RNA polymerase II, TATA box binding protein (TBP)-associated factor, 55kDa	0.425705	0.370891
445	TFTC complex (TATA-binding protein-free TAF-II-containing complex)	16	-0.220157	0.101019	0.499271	6880	TAF9	TAF9 RNA polymerase II, TATA box binding protein (TBP)-associated factor, 32kDa	0.316188	-0.500055
445	TFTC complex (TATA-binding protein-free TAF-II-containing complex)	16	-0.220157	0.101019	0.499271	6881	TAF10	TAF10 RNA polymerase II, TATA box binding protein (TBP)-associated factor, 30kDa	0.554056	-0.256447
445	TFTC complex (TATA-binding protein-free TAF-II-containing complex)	16	-0.220157	0.101019	0.499271	6883	TAF12	TAF12 RNA polymerase II, TATA box binding protein (TBP)-associated factor, 20kDa	0.578043	0.23804
445	TFTC complex (TATA-binding protein-free TAF-II-containing complex)	16	-0.220157	0.101019	0.499271	8295	TRRAP	transformation/transcription domain-associated protein	0.98445	-0.00680626
445	TFTC complex (TATA-binding protein-free TAF-II-containing complex)	16	-0.220157	0.101019	0.499271	8464	SUPT3H	suppressor of Ty 3 homolog (S. cerevisiae)	0.428823	0.367722
445	TFTC complex (TATA-binding protein-free TAF-II-containing complex)	16	-0.220157	0.101019	0.499271	10474	TADA3	transcriptional adaptor 3	0.023639	-1.62637
445	TFTC complex (TATA-binding protein-free TAF-II-containing complex)	16	-0.220157	0.101019	0.499271	10629	TAF6L	TAF6-like RNA polymerase II, p300/CBP-associated factor (PCAF)-associated factor, 65kDa	0.628231	-0.20188
445	TFTC complex (TATA-binding protein-free TAF-II-containing complex)	16	-0.220157	0.101019	0.499271	23450	SF3B3	splicing factor 3b, subunit 3, 130kDa	0.658181	-0.181655
445	TFTC complex (TATA-binding protein-free TAF-II-containing complex)	16	-0.220157	0.101019	0.499271	27097	TAF5L	TAF5-like RNA polymerase II, p300/CBP-associated factor (PCAF)-associated factor, 65kDa	0.610768	0.214123
455	TFTC complex (TATA-binding protein-free TAF-II-containing complex)	16	-0.220157	0.101019	0.499271	2648	KAT2A	K(lysine) acetyltransferase 2A	0.75761	-0.120554
455	TFTC complex (TATA-binding protein-free TAF-II-containing complex)	16	-0.220157	0.101019	0.499271	6314	ATXN7	ataxin 7	0.265434	-0.576044
455	TFTC complex (TATA-binding protein-free TAF-II-containing complex)	16	-0.220157	0.101019	0.499271	6873	TAF2	TAF2 RNA polymerase II, TATA box binding protein (TBP)-associated factor, 150kDa	0.142045	-0.847573
455	TFTC complex (TATA-binding protein-free TAF-II-containing complex)	16	-0.220157	0.101019	0.499271	6874	TAF4	TAF4 RNA polymerase II, TATA box binding protein (TBP)-associated factor, 135kDa	0.645657	0.189998
455	TFTC complex (TATA-binding protein-free TAF-II-containing complex)	16	-0.220157	0.101019	0.499271	6877	TAF5	TAF5 RNA polymerase II, TATA box binding protein (TBP)-associated factor, 100kDa	0.874783	0.0580994
455	TFTC complex (TATA-binding protein-free TAF-II-containing complex)	16	-0.220157	0.101019	0.499271	6878	TAF6	TAF6 RNA polymerase II, TATA box binding protein (TBP)-associated factor, 80kDa	0.226988	-0.643998
[truncated: 6,572 more rows]
